# Supplementary material for: Predicting population: development and validation of a new predictive nomogram for evaluating medication nonadherence risk in a type 2 diabetes
Source: PeerJ. 2022 Mar 15;10:e13102. doi: 10.7717/peerj.13102 (PMC8932313; doi:10.7717/peerj.13102)
Supplement: Supplemental Information 1 [file peerj-10-13102-s001.xlsx]

## Sheet: Sheet2
NO.	sex	age（years）	marital status	educational level	employment	working strength	monthly per capita income	type of medical insurance	distance to hospital（Km）	Self-monitoring of blood glucose(≥5 times/week)	Disease duration（years）	Family history of diabetes	height（cm）	weight	coronary heart disease	plaque	diabetic retinopathy	albuminuria	numbness, tingling, or neuropathic pain in the extremities	hyperlipemia	hypertension	hyperuricemia		Dosing frequency daily of hypoglycemic agents (pills, insulin, GLP-1)	Types of hypoglycemic pills prescribed daily	Current-use-of-insulin or /and GLP-1	forget to take medicines sometimes(NO=1,yes=0)	during last 2 weeks forgot to take medicines at some days(NO=1,yes=0)	stops when feels unhealthy after taking(NO=1,yes=0)	forgets to take medicines while leaves home(NO=1,yes=0)	took medicines yesterday(NO=1,yes=0)	stops when feels healthy(NO=1,yes=0)	Do you feel burdened or dissatisfied with the taken hypoglycemic medicine everyday	difficulty in remembering to take medicines(never/rarely(1);once in a while(0.75);sometimes(0.5);usually(0.25);all the time(0))(divide the score by 4)
1	M	52	married	primary	unemployed	light-to-moderate activity	1,000－9,999元	Urban medical insurance	<30	no	<1	no	175cm	75kg	unclear	yes	unclear	unclear	yes	yes	yes	yes	1－2	twice	0	no	yes	yes	no	yes	yes	no	no	0.75
2	F	54	married	secondary	employed	less activity	1,000－9,999元	Urban medical insurance	<30	yes	≥10	no	165cm	52kg	no	yes	yes	no	yes	no	no	no	1－2	thrice	1	Yes	no	no	no	no	yes	no	no	1
3	M	59	married	secondary	employed	less activity	1,000－9,999元	Urban medical insurance	<30	yes	≥10	no	173cm	74kg	no	yes	unclear	no	yes	no	no	unclear	4－5	thrice	2	Yes	no	yes	yes	no	yes	no	no	0.75
4	M	60	married	higher	employed	less activity	1,000－9,999元	Urban medical insurance	<30	no	5-10	yes	167cm	71	unclear	yes	unclear	no	no	yes	no	unclear	1－2	twice	1	Yes	yes	no	no	no	yes	no	no	0.75
5	M	48	married	primary	unemployed	light-to-moderate activity	＜1,000元	Rural cooperative medical care	≥30	yes	1_5	yes	170cm	80kg	unclear	unclear	unclear	unclear	unclear	yes	yes	unclear	3	twice	2	Yes	yes	no	yes	no	yes	yes	no	0.75
6	F	51	married	primary	unemployed	less activity	1,000－9,999元	Urban medical insurance	<30	yes	1_5	yes	172cm	80	no	no	no	no	no	unclear	no	no	1－2	twice	2	Yes	no	no	no	no	yes	no	no	0.75
7	F	31	married	higher	employed	less activity	1,000－9,999元	Urban medical insurance	<30	yes	<1	yes	162cm	64	no	no	no	no	no	yes	yes	no	1－2	thrice	0	Yes	yes	yes	yes	yes	yes	no	no	1
8	M	38	married	higher	employed	light-to-moderate activity	10,000-19,999元	Urban medical insurance	<30	yes	<1	yes	182cm	105	no	no	no	no	no	no	no	no	1－2	twice	0	no	yes	yes	no	no	yes	no	yes	1
9	F	63	married	secondary	unemployed	less activity	1,000－9,999元	Urban medical insurance	<30	no	≥10	no	162cm	60kg	no	yes	unclear	no	no	no	yes	no	4－5	thrice	1	Yes	yes	no	no	yes	yes	no	no	1
10	M	65	married	secondary	unemployed	less activity	1,000－9,999元	Urban medical insurance	<30	yes	5-10	no	169cm	73kg	no	yes	unclear	no	no	yes	yes	no	≥6	once	1	Yes	yes	no	no	yes	yes	no	no	1
11	M	37	married	secondary	employed	less activity	1,000－9,999元	Urban medical insurance	<30	yes	5-10	no	173cm	79kg	no	no	no	unclear	no	yes	yes	no	3	once	1	Yes	no	no	no	no	yes	no	yes	1
12	M	62	married	primary	employed	less activity	1,000－9,999元	Urban medical insurance	<30	yes	5-10	yes	170cm	63kg	no	yes	yes	no	unclear	no	yes	no	1－2	thrice	1	no	yes	no	no	yes	yes	no	no	0.75
13	F	61	married	primary	unemployed	less activity	＜1,000元	Rural cooperative medical care	<30	yes	≥10	no	166cm	80kg	no	yes	yes	yes	yes	no	no	no	4－5	twice	2	no	yes	no	no	yes	yes	no	yes	0.75
14	M	47	married	secondary	employed	less activity	1,000－9,999元	Urban medical insurance	<30	yes	5-10	no	165cm	68kg	no	yes	no	no	yes	yes	no	yes	3	thrice	≥3	no	yes	no	no	no	yes	no	yes	0.75
15	F	75	married	primary	unemployed	less activity	1,000－9,999元	Rural cooperative medical care	<30	no	1_5	yes	162cm	60kg	no	yes	no	yes	no	no	yes	unclear	1－2	once	1	Yes	yes	no	no	no	yes	no	no	0.75
16	M	55	married	secondary	employed	light-to-moderate activity	1,000－9,999元	Urban medical insurance	<30	no	<1	no	170cm	75kg	no	unclear	no	unclear	no	no	no	no	1－2	quartic	0	Yes	no	no	no	no	yes	yes	no	1
17	M	68	married	primary	unemployed	less activity	＜1,000元	Rural cooperative medical care	<30	no	≥10	no	173cm	67kg	yes	yes	no	no	yes	no	yes	no	≥6	quartic	0	Yes	yes	no	no	no	yes	no	no	0.75
18	M	62	married	primary	unemployed	less activity	1,000－9,999元	Urban medical insurance	<30	yes	5-10	no	177cm	70kg	yes	yes	no	unclear	yes	no	yes	no	1－2	twice	2	Yes	no	no	no	no	no	no	yes	1
19	M	60	married	secondary	unemployed	less activity	1,000－9,999元	Urban medical insurance	<30	no	1_5	no	170cm	66kg	no	no	no	unclear	no	no	yes	no	1－2	twice	1	no	yes	yes	yes	yes	yes	yes	no	0.75
20	M	46	married	secondary	employed	less activity	1,000－9,999元	Urban medical insurance	<30	yes	<1	no	170cm	90kg	no	unclear	no	unclear	yes	yes	no	unclear	1－2	quartic	0	Yes	no	no	no	no	yes	no	no	1
21	M	48	married	secondary	employed	light-to-moderate activity	1,000－9,999元	Urban medical insurance	<30	yes	<1	yes	180cm	80.8kg	no	yes	no	no	yes	yes	yes	no	1－2	thrice	2	no	no	no	no	no	yes	no	no	1
22	M	61	married	primary	unemployed	less activity	1,000－9,999元	Urban medical insurance	<30	yes	≥10	no	169cm	50kg	no	yes	yes	no	yes	unclear	yes	no	1－2	thrice	1	Yes	yes	yes	yes	yes	no	no	yes	0.75
23	M	69	married	primary	unemployed	less activity	1,000－9,999元	Urban medical insurance	<30	no	≥10	yes	175cm	75kg	no	yes	no	no	yes	no	no	no	1－2	quartic	0	Yes	yes	no	no	no	yes	no	no	0.75
24	M	60	married	secondary	unemployed	less activity	1,000－9,999元	Urban medical insurance	<30	yes	1_5	no	175cm	84kg	no	yes	no	no	no	yes	no	unclear	1--2	once	1	Yes	yes	yes	yes	yes	yes	yes	no	0.75
25	M	62	married	secondary	unemployed	less activity	1,000－9,999元	Urban medical insurance	<30	yes	5-10	yes	170cm	63kg	no	yes	yes	no	no	no	yes	no	1－2	thrice	1	Yes	no	no	no	no	yes	no	no	1
26	F	66	married	primary	unemployed	less activity	1,000－9,999元	Urban medical insurance	<30	yes	1_5	no	166cm	72kg	no	yes	yes	unclear	yes	yes	yes	no	1－2	once	≥3	no	yes	no	yes	no	yes	no	yes	0.75
27	F	76	married	secondary	unemployed	less activity	1,000－9,999元	Urban medical insurance	<30	no	5-10	no	158cm	66	no	yes	unclear	unclear	yes	no	yes	unclear	1－2	thrice	2	Yes	yes	yes	no	no	no	no	no	0.25
28	F	56	married	secondary	unemployed	less activity	1,000－9,999元	Rural cooperative medical care	<30	yes	≥10	yes	156cm	59kg	no	unclear	no	unclear	yes	yes	yes	unclear	≥6	thrice	1	Yes	yes	no	yes	yes	no	yes	no	0.5
29	M	62	married	secondary	unemployed	less activity	1,000－9,999元	Urban medical insurance	<30	yes	5-10	yes	170cm	75kg	unclear	unclear	yes	yes	yes	unclear	yes	no	3	once	1	Yes	yes	yes	no	yes	yes	no	yes	0.75
30	M	54	married	secondary	employed	less activity	1,000－9,999元	Urban medical insurance	<30	no	<1	no	175cm	75kg	no	unclear	no	no	no	yes	yes	no	1－2	quartic	0	Yes	no	no	no	no	yes	no	no	1
31	M	57	married	secondary	employed	light-to-moderate activity	1,000－9,999元	Urban medical insurance	<30	no	5-10	no	170cm	79kg	no	no	no	unclear	yes	yes	yes	no	1－2	thrice	1	no	yes	yes	no	no	yes	no	no	0.75
32	F	63	married	primary	unemployed	less activity	＜1,000元	Rural cooperative medical care	<30	yes	5-10	no	164cm	57kg	no	yes	yes	no	yes	yes	no	no	1－2	once	0	Yes	yes	no	no	no	yes	no	no	0.75
33	F	50	married	secondary	unemployed	less activity	1,000－9,999元	Urban medical insurance	<30	yes	<1	yes	160cm	70kg	yes	yes	no	no	no	yes	yes	no	1－2	thrice	0	Yes	no	no	no	no	yes	no	no	1
34	M	59	married	secondary	employed	less activity	1,000－9,999元	Urban medical insurance	<30	yes	5-10	no	172cm	68kg	no	yes	no	no	no	no	no	no	1－2	thrice	1	Yes	yes	yes	no	yes	yes	no	no	0.5
35	M	50	married	primary	unemployed	less activity	＜1,000元	Urban medical insurance	<30	yes	≥10	no	165cm	75kg	yes	yes	yes	yes	yes	yes	no	yes	1－2	once	1	Yes	yes	yes	no	yes	yes	no	yes	0.25
36	M	68	married	primary	unemployed	less activity	＜1,000元	Urban medical insurance	<30	no	1_5	no	172cm	87kg	yes	yes	no	yes	yes	yes	yes	no	1－2	thrice	≥3	no	yes	no	no	no	yes	yes	no	1
37	F	59	married	primary	unemployed	less activity	＜1,000元	Rural cooperative medical care	<30	yes	<1	no	150cm	70kg	no	unclear	unclear	unclear	no	unclear	no	unclear	1－2	quartic	0	Yes	no	no	no	no	no	no	no	1
38	M	67	married	secondary	unemployed	less activity	1,000－9,999元	Urban medical insurance	<30	yes	≥10	no	168cm	70kg	no	yes	yes	yes	yes	no	no	no	1－2	thrice	1	Yes	yes	yes	yes	yes	yes	yes	no	0.75
39	M	58	married	primary	unemployed	light-to-moderate activity	＜1,000元	Rural cooperative medical care	<30	yes	≥10	no	157cm	80kg	no	yes	no	no	yes	yes	yes	no	1－2	twice	0	yes	yes	no	yes	yes	yes	no	no	0.75
40	M	49	married	primary	unemployed	less activity	1,000－9,999元	Rural cooperative medical care	<30	no	5-10	yes	168cm	73kg	no	yes	yes	no	no	yes	no	no	3	thrice	≥3	no	yes	yes	yes	no	yes	yes	yes	0.25
41	F	69	married	secondary	unemployed	less activity	1,000－9,999元	Urban medical insurance	<30	yes	≥10	yes	158cm	75kg	yes	yes	no	no	yes	yes	yes	no	1－2	thrice	0	no	no	no	no	no	yes	no	no	0.75
42	F	63	married	secondary	unemployed	less activity	1,000－9,999元	Urban medical insurance	<30	yes	1_5	no	159cm	60kg	no	yes	no	no	yes	no	no	no	1－2	thrice	1	Yes	yes	no	no	no	yes	no	no	0.75
43	M	63	married	secondary	unemployed	less activity	1,000－9,999元	Urban medical insurance	<30	yes	≥10	no	172cm	75kg	yes	no	yes	no	yes	yes	yes	no	1－2	thrice	2	Yes	no	no	no	no	yes	no	no	1
44	M	46	married	secondary	employed	light-to-moderate activity	1,000－9,999元	self-funded	<30	yes	≥10	no	185cm	70kg	no	no	no	no	yes	yes	no	no	1－2	thrice	0	Yes	no	no	no	no	yes	no	no	1
45	M	38	married	secondary	employed	less activity	1,000－9,999元	Urban medical insurance	<30	yes	<1	no	167cm	65kg	no	yes	no	no	yes	no	no	no	3	twice	≥3	no	yes	yes	yes	yes	yes	yes	yes	0.75
46	M	66	married	primary	unemployed	less activity	＜1,000元	Rural cooperative medical care	<30	no	<1	yes	180cm	90kg	no	yes	yes	yes	no	yes	yes	no	1－2	thrice	0	yes	no	no	no	no	yes	no	no	1
47	F	57	married	primary	unemployed	less activity	1,000－9,999元	Urban medical insurance	<30	no	1_5	no	165cm	68kg	no	yes	no	no	no	yes	yes	yes	3	twice	2	no	yes	no	no	yes	no	no	no	0.75
48	M	36	married	primary	employed	light-to-moderate activity	1,000－9,999元	Rural cooperative medical care	<30	yes	1_5	no	170cm	70kg	no	no	no	no	no	yes	no	no	1－2	thrice	2	Yes	yes	yes	no	yes	no	no	no	0.5
49	M	27	married	primary	employed	light-to-moderate activity	1,000－9,999元	Urban medical insurance	≥30	no	<1	no	179cm	69kg	no	no	no	yes	no	yes	no	yes	1－2	quartic	0	Yes	no	no	no	no	yes	no	no	1
50	M	64	married	primary	unemployed	less activity	＜1,000元	Urban medical insurance	<30	yes	≥10	yes	170cm	70kg	no	yes	yes	unclear	yes	yes	yes	no	≥6	quartic	0	Yes	yes	yes	no	yes	yes	yes	no	0.25
51	M	61	married	primary	unemployed	less activity	1,000－9,999元	Urban medical insurance	<30	no	<1	yes	174cm	75kg	no	no	no	unclear	no	unclear	no	unclear	1－2	quartic	0	Yes	no	no	no	no	yes	no	yes	1
52	M	46	married	secondary	employed	less activity	1,000－9,999元	Urban medical insurance	<30	yes	<1	yes	170cm	92kg	no	yes	no	no	no	yes	yes	unclear	3	thrice	≥3	no	no	no	no	no	yes	no	no	1
53	M	55	married	secondary	employed	light-to-moderate activity	10,000-19,999元	Urban medical insurance	<30	yes	1_5	no	168cm	75kg	no	yes	no	unclear	no	yes	yes	yes	1－2	once	1	Yes	yes	yes	no	yes	yes	yes	no	0.75
54	F	62	married	secondary	unemployed	less activity	1,000－9,999元	Urban medical insurance	<30	yes	≥10	no	156cm	62.5kg	no	no	yes	no	yes	no	yes	yes	1－2	once	1	Yes	yes	yes	no	no	yes	no	no	0.75
55	F	56	married	secondary	employed	less activity	10,000-19,999元	Urban medical insurance	<30	yes	<1	no	160cm	60kg	yes	yes	no	no	no	no	yes	no	1－2	twice	2	Yes	no	no	no	no	yes	no	no	1
56	F	58	married	secondary	unemployed	less activity	1,000－9,999元	Urban medical insurance	<30	yes	<1	no	165cm	59kg	no	no	no	no	no	yes	no	no	1－2	quartic	0	Yes	no	no	no	no	yes	no	yes	1
57	F	72	married	secondary	unemployed	less activity	1,000－9,999元	Urban medical insurance	<30	no	≥10	yes	169cm	70kg	yes	yes	yes	yes	yes	no	yes	no	1－2	thrice	2	Yes	yes	yes	no	yes	yes	no	yes	0.75
58	F	61	married	primary	unemployed	less activity	＜1,000元	Rural cooperative medical care	<30	yes	≥10	yes	158cm	45kg	no	yes	yes	no	no	no	yes	no	1－2	quartic	0	Yes	yes	no	no	no	yes	no	no	0.75
59	M	75	married	primary	unemployed	less activity	＜1,000元	Rural cooperative medical care	<30	yes	5-10	yes	161cm	65kg	no	yes	no	no	yes	no	yes	no	1－2	once	1	Yes	yes	yes	no	no	yes	no	yes	0.75
60	F	49	married	primary	unemployed	less activity	＜1,000元	Rural cooperative medical care	<30	yes	5-10	no	143cm	47kg	no	no	no	no	yes	no	no	no	1－2	quartic	0	no	no	no	no	no	no	no	no	0.75
61	F	54	single	primary	unemployed	less activity	＜1,000元	Urban medical insurance	<30	yes	5-10	yes	162cm	65.5kg	no	yes	no	no	no	yes	no	no	3	thrice	≥3	no	yes	no	no	no	yes	no	yes	0.75
62	F	50	married	secondary	unemployed	less activity	1,000－9,999元	Urban medical insurance	<30	no	≥10	no	170cm	53kg	unclear	yes	yes	unclear	no	no	yes	unclear	1－2	thrice	1	Yes	yes	no	yes	yes	no	yes	no	0.75
63	F	71	married	primary	unemployed	less activity	＜1,000元	Rural cooperative medical care	<30	yes	≥10	no	153cn	57kg	no	yes	yes	unclear	no	no	yes	no	1－2	thrice	1	yes	no	no	no	yes	no	no	no	1
64	M	42	married	secondary	employed	less activity	1,000－9,999元	Urban medical insurance	<30	yes	<1	yes	183cm	105kg	no	yes	no	no	no	no	no	yes	1－2	thrice	0	Yes	no	no	no	no	yes	no	no	1
65	M	55	married	secondary	employed	less activity	10,000-19,999元	Urban medical insurance	<30	yes	≥10	yes	168cm	85kg	no	yes	no	no	yes	yes	yes	yes	3	thrice	≥3	no	yes	yes	no	no	yes	no	yes	0.75
66	M	56	married	secondary	employed	light-to-moderate activity	1,000－9,999元	Urban medical insurance	<30	yes	≥10	no	161cm	74kg	no	no	yes	yes	no	no	yes	no	1－2	twice	2	Yes	yes	yes	no	no	yes	no	no	0.5
67	M	62	married	secondary	unemployed	less activity	1,000－9,999元	Urban medical insurance	<30	yes	≥10	yes	170cm	65kg	yes	unclear	yes	unclear	yes	unclear	yes	unclear	1－2	thrice	1	Yes	yes	no	no	yes	yes	no	no	0.5
68	F	77	married	primary	unemployed	less activity	1,000－9,999元	Urban medical insurance	<30	yes	≥10	yes	160cm	72kg	no	yes	no	no	yes	yes	yes	unclear	≥6	twice	1	Yes	yes	yes	no	no	yes	no	no	0.25
69	M	55	married	secondary	employed	less activity	1,000－9,999元	Urban medical insurance	<30	yes	<1	yes	171cm	85kg	no	yes	unclear	no	no	yes	no	yes	1－2	quartic	0	Yes	no	no	no	no	no	no	no	1
70	M	67	married	secondary	unemployed	less activity	1,000－9,999元	Urban medical insurance	<30	yes	≥10	yes	172cm	72kg	no	yes	yes	no	yes	yes	yes	no	1－2	once	2	Yes	yes	no	yes	yes	yes	no	yes	0.5
71	F	60	married	primary	unemployed	less activity	1,000－9,999元	Rural cooperative medical care	<30	yes	1_5	yes	160cm	86kg	no	yes	no	no	yes	no	no	no	1－2	thrice	0	Yes	no	yes	no	no	yes	no	no	1
72	M	48	married	secondary	employed	light-to-moderate activity	1,000－9,999元	Urban medical insurance	<30	yes	≥10	no	175cm	77kg	no	yes	yes	no	yes	yes	no	no	1－2	thrice	2	no	yes	no	no	yes	yes	no	no	0.75
73	F	60	married	primary	unemployed	less activity	1,000－9,999元	Rural cooperative medical care	<30	yes	1_5年	yes	160cm	86kg	no	yes	no	no	yes	no	no	no	1－2	thrice	1	Yes	yes	no	no	no	yes	no	no	1
74	M	63	married	secondary	unemployed	less activity	1,000－9,999元	Urban medical insurance	<30	yes	5-10	yes	167cn	61kg	yes	yes	no	unclear	unclear	yes	yes	no	1－2	thrice	1	Yes	no	no	no	yes	yes	no	no	0.75
75	M	27	married	primary	employed	light-to-moderate activity	1,000－9,999元	self-funded	<30	yes	1_5年	no	165cm	59kg	no	no	no	no	no	no	no	unclear	1－2	quartic	0	Yes	yes	yes	yes	yes	yes	yes	no	0
76	M	54	married	secondary	unemployed	less activity	1,000－9,999元	Urban medical insurance	<30	yes	5-10	no	160cm	70kg	yes	yes	no	no	yes	yes	yes	no	1－2	twice	2	Yes	no	no	no	yes	yes	no	no	1
77	M	58	married	secondary	employed	less activity	1,000－9,999元	Urban medical insurance	<30	no	<1	no	176cm	63kg	no	no	no	unclear	yes	no	no	no	1－2	twice	2	Yes	no	no	no	no	yes	no	no	1
78	F	56	married	primary	unemployed	less activity	1,000－9,999元	Urban medical insurance	≥30	yes	<1	no	166cm	85kg	no	no	no	yes	no	no	yes	no	1－2	thrice	0	yes	no	no	no	no	yes	no	yes	1
79	F	67	married	primary	unemployed	less activity	1,000－9,999元	Rural cooperative medical care	<30	yes	5-10	no	160cm	60kg	yes	yes	no	no	yes	yes	yes	no	3	thrice	≥3	no	yes	no	no	no	yes	no	no	0.75
80	M	61	married	secondary	unemployed	less activity	1,000－9,999元	Urban medical insurance	<30	no	1_5	no	173cm	82kg	no	yes	yes	no	yes	no	yes	no	1－2	twice	2	Yes	yes	no	no	yes	yes	no	no	0.75
81	M	55	married	secondary	employed	light-to-moderate activity	10,000-19,999元	Urban medical insurance	<30	yes	≥10	no	172cm	90kg	no	yes	yes	yes	yes	yes	no	yes	1－2	thrice	2	Yes	yes	yes	no	yes	yes	no	no	0.75
82	F	59	married	secondary	unemployed	less activity	1,000－9,999元	Urban medical insurance	<30	yes	≥10	no	160cm	72kg	no	yes	yes	no	no	yes	yes	no	1－2	quartic	0	yes	yes	no	no	yes	yes	no	no	0.75
83	M	59	married	secondary	employed	light-to-moderate activity	1,000－9,999元	Urban medical insurance	<30	yes	≥10	no	170cm	77kg	no	yes	yes	no	yes	no	yes	no	1－2	twice	2	Yes	no	no	no	no	yes	no	no	1
84	F	50	married	primary	unemployed	less activity	1,000－9,999元	Rural cooperative medical care	<30	yes	≥10	yes	164cm	89kg	no	yes	no	yes	yes	yes	yes	no	3	thrice	≥3	no	yes	yes	yes	yes	yes	yes	no	0.75
85	M	48	married	primary	employed	light-to-moderate activity	1,000－9,999元	Urban medical insurance	<30	yes	≥10	yes	175cm	60kg	no	yes	no	yes	no	no	no	no	1－2	thrice	2	no	yes	no	no	yes	yes	no	no	0.75
86	F	68	married	primary	unemployed	less activity	1,000－9,999元	Urban medical insurance	<30	yes	1_5	no	160cm	62kg	no	yes	no	unclear	yes	no	yes	unclear	1－2	thrice	0	yes	yes	no	no	no	yes	no	no	0.75
87	M	65	married	secondary	unemployed	less activity	1,000－9,999元	Urban medical insurance	<30	yes	≥10	yes	171cm	71kg	no	yes	no	no	yes	yes	no	no	1－2	once	1	Yes	no	no	no	no	yes	no	no	0.75
88	F	62	married	primary	unemployed	less activity	＜1,000元	Rural cooperative medical care	≥30	no	<1	no	160cm	65kg	no	no	no	no	no	unclear	yes	no	1－2	quartic	0	Yes	no	no	no	no	no	no	no	1
89	F	56	married	secondary	unemployed	less activity	1,000－9,999元	Urban medical insurance	<30	yes	5-10	no	160cm	68kg	no	yes	no	yes	yes	yes	yes	no	3	thrice	1	Yes	yes	yes	no	no	yes	no	no	1
90	M	50	married	secondary	employed	light-to-moderate activity	1,000－9,999元	Urban medical insurance	<30	yes	5-10	no	168cm	65.5kg	no	yes	yes	unclear	yes	no	no	yes	1－2	twice	2	Yes	yes	yes	yes	yes	yes	no	no	0.25
91	M	72	married	secondary	unemployed	less activity	1,000－9,999元	Urban medical insurance	<30	yes	≥10	yes	168cm	75kg	no	yes	yes	no	yes	no	no	no	1－2	twice	2	Yes	yes	no	no	no	yes	no	no	0.75
92	M	49	married	primary	employed	light-to-moderate activity	1,000－9,999元	Rural cooperative medical care	<30	yes	5-10	yes	175cm	70kg	no	yes	no	no	yes	yes	yes	no	1－2	once	1	Yes	yes	yes	no	yes	yes	yes	no	0.5
93	M	62	married	secondary	unemployed	less activity	10,000-19,999元	self-funded	<30	yes	1_5	no	175cm	75kg	yes	yes	no	no	yes	no	yes	no	1－2	thrice	0	yes	yes	no	no	no	yes	no	no	1
94	F	40	married	primary	unemployed	less activity	＜1,000元	Rural cooperative medical care	<30	no	<1	no	163cm	60kg	no	no	unclear	unclear	yes	yes	no	unclear	1－2	thrice	2	Yes	no	no	no	no	yes	no	yes	1
95	M	55	married	secondary	unemployed	less activity	＜1,000元	Rural cooperative medical care	≥30	yes	≥10	no	175cm	75kg	no	yes	no	no	no	yes	yes	no	1－2	thrice	2	Yes	yes	no	no	no	yes	no	no	1
96	M	41	married	secondary	employed	light-to-moderate activity	1,000－9,999元	Urban medical insurance	<30	yes	1_5	no	175cm	79kg	no	yes	yes	no	yes	yes	no	no	1－2	once	0	Yes	no	no	no	no	yes	no	no	0.75
97	M	49	married	secondary	employed	light-to-moderate activity	1,000－9,999元	Urban medical insurance	<30	no	<1	no	178cm	83kg	yes	yes	yes	no	yes	yes	yes	no	1－2	thrice	0	Yes	no	no	no	no	yes	no	yes	1
98	F	49	married	secondary	employed	light-to-moderate activity	1,000－9,999元	Urban medical insurance	<30	yes	5-10	no	168cm	70kg	no	yes	no	no	no	no	no	no	1－2	thrice	1	Yes	no	no	no	no	yes	no	no	1
99	M	59	married	secondary	employed	light-to-moderate activity	1,000－9,999元	Urban medical insurance	<30	no	5-10	no	178cm	90kg	no	yes	no	no	yes	no	yes	no	3	thrice	≥3	no	yes	no	no	no	yes	no	no	0.75
100	M	57	married	primary	employed	light-to-moderate activity	1,000－9,999元	Urban medical insurance	<30	yes	<1	no	180cm	88kg	no	yes	no	unclear	yes	yes	yes	no	1－2	twice	2	Yes	yes	yes	no	yes	yes	yes	no	1
101	F	31	single	secondary	employed	light-to-moderate activity	1,000－9,999元	Urban medical insurance	<30	yes	1_5	no	173cm	92.5kg	no	no	no	no	no	yes	no	no	1－2	quartic	0	yes	no	no	no	no	yes	no	no	1
102	M	56	married	secondary	employed	less activity	1,000－9,999元	Urban medical insurance	<30	yes	5-10	no	180cm	77kg	no	yes	no	no	yes	no	yes	no	1－2	quartic	2	Yes	no	no	no	no	yes	no	no	0.75
103	M	67	married	secondary	unemployed	less activity	1,000－9,999元	Urban medical insurance	<30	yes	≥10	no	172cm	77kg	no	yes	yes	yes	yes	no	yes	no	≥6	quartic	0	yes	yes	no	no	no	yes	no	no	0.75
104	F	54	married	secondary	unemployed	less activity	1,000－9,999元	Urban medical insurance	<30	yes	1_5	yes	160cm	57.5kg	no	yes	no	no	yes	yes	no	no	1－2	once	0	Yes	yes	no	no	yes	yes	no	no	1
105	F	56	single	primary	unemployed	less activity	＜1,000元	Rural cooperative medical care	<30	no	≥10	no	158cm	58kg	no	yes	yes	unclear	no	yes	no	no	4-5	twice	2	no	yes	yes	yes	yes	no	yes	no	0.5
106	M	72	married	secondary	unemployed	less activity	1,000－9,999元	Urban medical insurance	<30	yes	≥10	no	172cm	73kg	yes	yes	yes	unclear	yes	no	yes	no	1－2	thrice	0	Yes	no	no	no	no	no	no	no	1
107	F	70	single	secondary	unemployed	less activity	1,000－9,999元	Urban medical insurance	<30	no	<1	no	165cm	70kg	yes	yes	no	no	no	yes	no	no	1－2	twice	2	Yes	yes	no	no	no	yes	no	no	1
108	M	50	married	secondary	employed	light-to-moderate activity	1,000－9,999元	Urban medical insurance	<30	yes	≥10	no	160cm	57kg	no	yes	no	no	yes	yes	no	no	4-5	quartic	2	Yes	yes	no	no	no	yes	no	no	0.75
109	F	36	married	secondary	employed	light-to-moderate activity	1,000－9,999元	Urban medical insurance	<30	yes	≥10	yes	180cm	80kg	no	yes	yes	yes	yes	yes	no	no	4-5	quartic	2	Yes	no	no	no	yes	yes	yes	no	1
110	M	60	married	secondary	employed	less activity	1,000－9,999元	Urban medical insurance	≥30	yes	≥10	no	165cm	70kg	no	yes	yes	no	yes	yes	no	no	1－2	quartic	1	Yes	no	no	no	no	yes	no	no	0.75
111	M	39	married	secondary	employed	less activity	1,000－9,999元	Rural cooperative medical care	<30	no	<1	yes	173cm	68kg	no	no	no	no	yes	yes	no	no	1－2	thrice	0	Yes	no	no	no	no	yes	yes	yes	1
112	M	68	married	primary	employed	light-to-moderate activity	1,000－9,999元	Rural cooperative medical care	<30	yes	5-10	yes	178cm	83kg	yes	no	no	unclear	no	yes	yes	no	1－2	once	1	Yes	yes	yes	no	yes	yes	no	no	0.75
113	M	52	married	secondary	employed	less activity	1,000－9,999元	Urban medical insurance	<30	no	<1	yes	170cm	70kg	no	no	no	unclear	no	unclear	no	unclear	1－2	thrice	0	Yes	no	no	no	no	yes	no	yes	0.75
114	F	55	married	primary	unemployed	less activity	＜1,000元	Rural cooperative medical care	<30	yes	≥10	yes	158cm	64kg	no	unclear	yes	unclear	yes	yes	no	unclear	1－2	thrice	0	Yes	yes	no	no	no	yes	no	no	1
115	F	65	married	primary	employed	less activity	＜1,000元	Rural cooperative medical care	≥30	no	<1	yes	167cm	62.5kg	no	no	no	no	no	no	no	no	1－2	once	0	Yes	no	no	no	no	yes	no	no	1
116	F	57	single	primary	unemployed	less activity	1,000－9,999元	Urban medical insurance	<30	yes	1_5	yes	161xm	71kg	no	yes	no	unclear	no	yes	yes	unclear	3	twice	≥3	no	no	yes	yes	yes	yes	no	yes	0.5
117	M	60	married	secondary	unemployed	light-to-moderate activity	1,000－9,999元	Urban medical insurance	<30	yes	≥10	no	164cm	70kg	yes	yes	no	unclear	yes	no	no	unclear	1－2	twice	2	Yes	yes	yes	yes	no	yes	no	no	1
118	M	48	married	primary	employed	less activity	1,000－9,999元	Urban medical insurance	<30	yes	≥10	yes	175cm	62.5kg	no	yes	no	yes	yes	no	no	no	1－2	once	0	Yes	no	no	no	yes	yes	no	no	1
119	M	49	married	secondary	employed	light-to-moderate activity	1,000－9,999元	Urban medical insurance	<30	yes	<1	yes	173cm	70kg	no	yes	no	no	yes	yes	no	no	3	quartic	≥3	no	yes	no	no	no	yes	no	yes	0.75
120	F	45	married	secondary	employed	light-to-moderate activity	1,000－9,999元	Urban medical insurance	<30	yes	5-10	no	175cm	90kg	no	yes	no	no	yes	yes	no	no	1－2	twice	2	Yes	yes	no	yes	yes	yes	no	no	0.5
121	M	48	married	secondary	employed	less activity	1,000－9,999元	Urban medical insurance	<30	yes	5-10	yes	182cm	88kg	no	yes	no	no	yes	no	no	no	1－2	quartic	2	no	yes	yes	yes	yes	yes	no	no	0.5
122	M	58	married	secondary	unemployed	less activity	1,000－9,999元	Urban medical insurance	<30	yes	≥10	no	166cm	66kg	no	yes	no	unclear	yes	no	no	no	3	quartic	≥3	no	yes	no	no	no	yes	no	no	1
123	M	47	single	secondary	employed	light-to-moderate activity	10,000-19,999元	Urban medical insurance	<30	yes	1_5	no	160cm	70kg	no	yes	no	no	yes	no	yes	no	1－2	quartic	1	Yes	yes	no	no	no	yes	no	no	1
124	F	55	married	primary	unemployed	less activity	1,000－9,999元	Urban medical insurance	<30	yes	<1	no	162cm	60kg	no	yes	yes	no	yes	yes	no	no	1－2	once	0	Yes	yes	yes	yes	yes	yes	no	no	0.75
125	M	59	married	primary	employed	light-to-moderate activity	1,000－9,999元	self-funded	<30	no	≥10	yes	172cm	58kg	no	no	yes	unclear	yes	unclear	no	no	1－2	once	0	Yes	yes	yes	yes	yes	yes	yes	no	0.25
126	M	56	married	secondary	unemployed	less activity	1,000－9,999元	Urban medical insurance	<30	yes	5-10	yes	176cm	73.5kg	no	no	unclear	no	yes	no	no	no	1－2	quartic	1	Yes	yes	no	no	yes	no	no	no	1
127	F	53	married	secondary	unemployed	less activity	1,000－9,999元	Urban medical insurance	<30	yes	≥10	yes	155cm	67kg	yes	yes	yes	yes	yes	yes	yes	yes	4-5	quartic	0	yes	yes	no	no	yes	yes	no	no	0.75
128	M	55	married	secondary	employed	less activity	1,000－9,999元	Urban medical insurance	<30	yes	1_5	yes	178cm	90kg	no	yes	no	no	yes	yes	yes	no	3	quartic	≥3	no	yes	yes	no	no	yes	no	no	0.75
129	M	69	married	secondary	unemployed	less activity	1,000－9,999元	Urban medical insurance	<30	yes	≥10	no	178cm	62kg	no	yes	yes	no	yes	no	no	no	1－2	quartic	1	Yes	yes	yes	no	no	yes	no	no	1
130	M	67	married	secondary	unemployed	less activity	1,000－9,999元	Urban medical insurance	<30	yes	≥10	no	166cm	90kg	yes	yes	no	no	yes	no	yes	no	1－2	quartic	0	yes	yes	no	no	no	yes	no	no	0.75
131	F	19	single	secondary	unemployed	light-to-moderate activity	＜1,000元	Rural cooperative medical care	<30	yes	1_5	yes	160cm	56kg	no	no	no	no	no	no	no	yes	1－2	once	0	Yes	yes	no	yes	yes	yes	no	no	0.75
132	M	41	married	higher	employed	light-to-moderate activity	10,000-19,999元	Urban medical insurance	<30	no	1_5	yes	175cm	73kg	no	unclear	no	no	no	yes	no	no	3	quartic	≥3	no	yes	no	no	no	yes	no	no	1
133	M	68	married	secondary	employed	light-to-moderate activity	1,000－9,999元	self-funded	<30	yes	≥10	no	179cm	80kg	no	yes	yes	unclear	yes	no	yes	unclear	1－2	thrice	0	Yes	yes	yes	no	no	yes	no	no	0.75
134	M	50	married	primary	employed	light-to-moderate activity	1,000－9,999元	Rural cooperative medical care	<30	yes	5-10	no	156cm	60kg	no	no	no	unclear	yes	no	no	unclear	1－2	thrice	0	Yes	yes	no	no	no	yes	no	no	0.75
135	F	60	single	primary	unemployed	less activity	＜1,000元	Rural cooperative medical care	≥30	yes	5-10	no	158cm	54kg	no	yes	no	no	no	no	no	no	1－2	quartic	1	Yes	yes	no	no	yes	yes	no	yes	0.75
136	F	67	married	secondary	unemployed	less activity	1,000－9,999元	Urban medical insurance	<30	yes	≥10	yes	162cm	67kg	yes	yes	no	no	yes	yes	yes	unclear	1－2	thrice	0	Yes	yes	no	no	no	yes	no	yes	1
137	M	48	married	secondary	employed	light-to-moderate activity	1,000－9,999元	Urban medical insurance	<30	yes	5-10	no	160cm	59kg	no	yes	no	no	yes	yes	yes	no	1－2	once	0	Yes	no	no	no	yes	yes	no	no	1
138	M	63	married	primary	unemployed	moderate or heavy activity	1,000－9,999元	Rural cooperative medical care	<30	no	≥10	no	162cm	61kg	no	yes	unclear	unclear	yes	unclear	yes	no	1－2	thrice	0	Yes	yes	yes	no	yes	yes	no	no	0.5
139	M	46	married	primary	employed	moderate or heavy activity	1,000－9,999元	Rural cooperative medical care	<30	yes	<1	yes	170cm	55kg	no	yes	no	unclear	no	no	no	no	1－2	twice	0	Yes	yes	yes	no	yes	yes	no	no	0.25
140	F	64	married	secondary	unemployed	less activity	1,000－9,999元	Urban medical insurance	<30	yes	≥10	yes	155cm	59kg	no	yes	no	yes	yes	yes	no	no	1－2	quartic	0	yes	yes	no	no	no	yes	no	no	1
141	M	58	married	secondary	employed	light-to-moderate activity	1,000－9,999元	Urban medical insurance	<30	no	1_5	no	177cm	64kg	no	no	no	yes	no	yes	no	no	1－2	once	1	Yes	yes	yes	yes	yes	yes	yes	no	0.75
142	M	37	married	secondary	employed	light-to-moderate activity	1,000－9,999元	Urban medical insurance	<30	no	<1	no	172cm	70kg	no	no	no	no	no	no	yes	no	1－2	quartic	1	Yes	no	no	no	no	yes	no	no	0.75
143	M	44	married	secondary	employed	light-to-moderate activity	1,000－9,999元	Urban medical insurance	≥30	no	1_5	no	185cm	85kg	no	no	no	yes	no	no	yes	no	1－2	once	1	Yes	no	no	yes	no	no	yes	yes	0.5
144	M	44	married	secondary	employed	less activity	1,000－9,999元	Urban medical insurance	<30	yes	5-10	no	165cm	70kg	no	yes	yes	no	no	no	yes	no	1－2	quartic	1	Yes	no	no	yes	yes	yes	yes	no	1
145	F	63	married	primary	unemployed	less activity	1,000－9,999元	Urban medical insurance	≥30	yes	5-10	no	167cm	72kg	no	yes	yes	yes	yes	yes	yes	no	4-5	quartic	0	Yes	yes	no	yes	no	yes	yes	yes	0.75
146	M	68	married	secondary	unemployed	less activity	1,000－9,999元	Urban medical insurance	<30	yes	5-10	yes	175cm	90kg	no	no	no	unclear	yes	yes	no	no	1－2	twice	2	Yes	yes	no	no	no	yes	no	no	0.75
147	M	62	married	secondary	unemployed	less activity	1,000－9,999元	Urban medical insurance	<30	no	<1	yes	180cm	75.1kg	no	yes	no	yes	no	no	yes	no	1－2	quartic	1	Yes	no	no	no	no	yes	no	yes	1
148	M	30	married	primary	employed	moderate or heavy activity	1,000－9,999元	Rural cooperative medical care	<30	yes	1_5	yes	169cm	62kg	no	no	no	unclear	no	no	no	no	1－2	quartic	2	Yes	yes	yes	no	no	no	no	no	1
149	M	54	married	secondary	unemployed	less activity	1,000－9,999元	Urban medical insurance	<30	yes	≥10	no	178cm	83kg	no	yes	yes	no	yes	no	yes	no	1－2	twice	2	Yes	no	no	no	no	yes	no	no	1
150	M	54	single	secondary	unemployed	light-to-moderate activity	1,000－9,999元	Rural cooperative medical care	<30	yes	5-10	no	175cm	90kg	no	yes	no	yes	yes	yes	no	no	3	quartic	1	Yes	yes	yes	yes	yes	yes	no	yes	0.75
151	F	59	married	primary	unemployed	less activity	1,000－9,999元	Urban medical insurance	<30	yes	≥10	no	165cm	75kg	no	yes	no	no	yes	yes	yes	yes	1－2	quartic	2	Yes	yes	no	no	yes	yes	no	no	0.75
152	F	73	married	primary	unemployed	less activity	1,000－9,999元	Urban medical insurance	<30	yes	≥10	yes	158cm	77kg	yes	yes	no	no	yes	yes	yes	yes	1－2	quartic	1	Yes	yes	no	no	no	yes	no	no	1
153	M	64	married	secondary	unemployed	less activity	1,000－9,999元	Urban medical insurance	<30	yes	≥10	no	183cm	91kg	no	yes	no	no	yes	no	no	no	1－2	once	1	Yes	yes	no	no	no	yes	no	no	0.75
154	F	53	married	primary	unemployed	less activity	1,000－9,999元	Urban medical insurance	<30	no	<1	no	160cm	75kg	no	yes	no	no	yes	yes	yes	no	1－2	twice	2	Yes	yes	no	no	yes	yes	no	no	0.75
155	F	46	married	secondary	unemployed	less activity	＜1,000元	Rural cooperative medical care	<30	yes	5-10	no	160cm	70kg	no	no	yes	no	yes	yes	yes	no	4-5	once	1	Yes	yes	no	no	no	yes	no	no	0.75
156	F	53	single	primary	unemployed	less activity	1,000－9,999元	Urban medical insurance	<30	yes	≥10	no	165cm	57kg	no	yes	no	no	yes	no	no	no	3	quartic	≥3	no	yes	no	no	yes	yes	no	no	0.75
157	M	56	married	secondary	unemployed	less activity	1,000－9,999元	Urban medical insurance	<30	no	≥10	yes	185cm	88kg	no	yes	yes	no	yes	no	no	no	1－2	thrice	0	yes	no	no	no	yes	yes	no	no	1
158	M	46	married	secondary	employed	light-to-moderate activity	1,000－9,999元	Urban medical insurance	<30	no	1_5	yes	160cm	63kg	no	yes	yes	no	no	no	no	no	1－2	quartic	1	Yes	yes	no	no	no	yes	no	no	0.75
159	F	55	married	secondary	unemployed	less activity	1,000－9,999元	Urban medical insurance	<30	yes	5-10	no	164cm	87kg	no	yes	yes	no	yes	yes	no	no	1－2	quartic	0	yes	yes	no	no	no	yes	no	no	1
160	F	54	married	secondary	unemployed	less activity	1,000－9,999元	Urban medical insurance	<30	yes	≥10	no	165cm	52kg	no	yes	yes	no	yes	no	no	no	1－2	quartic	1	Yes	yes	no	no	no	yes	no	no	0.75
161	M	64	married	secondary	unemployed	less activity	1,000－9,999元	Urban medical insurance	<30	yes	1_5	no	168cm	68.5kg	no	yes	no	no	no	yes	no	no	1－2	quartic	1	Yes	yes	no	no	yes	yes	no	no	0.75
162	F	64	married	secondary	unemployed	less activity	1,000－9,999元	Urban medical insurance	<30	yes	1_5	no	163cm	68kg	no	yes	no	no	yes	no	yes	no	1－2	quartic	2	Yes	yes	no	no	no	yes	no	no	1
163	M	54	married	secondary	employed	light-to-moderate activity	1,000－9,999元	Urban medical insurance	<30	yes	5-10	no	169cm	73.5kg	no	unclear	yes	unclear	yes	yes	yes	yes	4-5	quartic	2	Yes	yes	no	no	no	yes	no	no	1
164	M	41	married	secondary	employed	light-to-moderate activity	1,000－9,999元	self-funded	<30	no	<1	no	179cm	78kg	no	yes	no	no	no	yes	no	no	1－2	quartic	2	Yes	no	no	no	no	yes	no	no	1
165	M	65	married	primary	unemployed	less activity	＜1,000元	Rural cooperative medical care	<30	yes	≥10	no	165cm	60kg	yes	yes	no	yes	yes	yes	yes	no	1－2	once	0	Yes	no	no	no	no	yes	no	no	1
166	M	33	married	secondary	employed	less activity	1,000－9,999元	Urban medical insurance	<30	no	5-10	no	179cm	86kg	no	yes	no	no	no	no	no	no	1－2	quartic	0	Yes	yes	yes	no	yes	yes	no	no	0.75
167	M	54	married	secondary	employed	less activity	1,000－9,999元	Urban medical insurance	<30	no	<1	yes	178cm	100kg	yes	unclear	no	unclear	no	yes	yes	unclear	1－2	once	0	Yes	no	yes	no	no	no	no	no	1
168	F	59	single	primary	unemployed	less activity	1,000－9,999元	Rural cooperative medical care	<30	yes	≥10	yes	167cm	65kg	no	yes	yes	no	yes	yes	yes	no	4-5	quartic	2	Yes	no	no	no	yes	yes	no	no	0.75
169	M	66	married	secondary	unemployed	less activity	1,000－9,999元	Urban medical insurance	<30	yes	5-10	yes	175cm	82kg	no	yes	no	no	yes	no	yes	no	1－2	once	0	Yes	yes	no	no	no	yes	no	no	0.75
170	M	79	single	secondary	unemployed	less activity	1,000－9,999元	Urban medical insurance	<30	yes	≥10	no	170cm	85kg	no	yes	yes	yes	yes	no	yes	no	1－2	thrice	0	Yes	no	no	no	no	yes	no	no	1
171	M	42	married	secondary	unemployed	light-to-moderate activity	1,000－9,999元	Urban medical insurance	<30	no	<1	no	175cm	60kg	no	unclear	no	yes	no	yes	no	no	1－2	thrice	0	Yes	yes	no	no	no	no	no	no	1
172	M	65	married	primary	unemployed	light-to-moderate activity	1,000－9,999元	Rural cooperative medical care	<30	yes	5-10	yes	172cm	72kg	yes	yes	no	unclear	yes	no	no	no	1－2	quartic	2	Yes	yes	yes	no	yes	yes	no	no	0.75
173	F	75	married	primary	unemployed	less activity	1,000－9,999元	Rural cooperative medical care	<30	yes	≥10	no	168cm	72kg	no	yes	yes	yes	yes	yes	yes	no	4-5	quartic	1	Yes	no	no	no	no	yes	no	no	1
174	F	53	single	secondary	unemployed	less activity	1,000－9,999元	Urban medical insurance	<30	yes	5-10	no	160cm	62kg	no	yes	no	no	yes	yes	yes	no	1－2	once	2	Yes	yes	no	no	no	yes	no	no	0.75
175	F	62	married	primary	unemployed	less activity	1,000－9,999元	Urban medical insurance	<30	yes	5-10	yes	168cm	72kg	no	yes	no	no	no	no	yes	no	1－2	once	1	Yes	yes	no	no	no	yes	no	no	0.75
176	F	64	married	primary	unemployed	less activity	1,000－9,999元	Urban medical insurance	<30	no	≥10	no	156cm	67kg	no	yes	no	no	yes	yes	no	no	3	once	≥3	no	no	no	no	no	yes	no	no	1
177	M	56	married	primary	unemployed	less activity	1,000－9,999元	Urban medical insurance	<30	yes	5-10	no	172cm	72kg	no	yes	no	no	no	no	no	no	1－2	quartic	1	Yes	yes	no	no	yes	yes	no	no	0.75
178	F	62	married	primary	unemployed	less activity	＜1,000元	Rural cooperative medical care	<30	yes	≥10	no	160cm	66kg	yes	yes	no	unclear	yes	no	yes	no	1－2	quartic	2	Yes	yes	yes	yes	yes	yes	no	yes	0.5
179	F	53	married	secondary	unemployed	less activity	1,000－9,999元	Urban medical insurance	<30	yes	≥10	yes	155cm	60kg	no	yes	no	no	yes	no	no	no	1－2	once	1	Yes	yes	no	yes	yes	yes	no	no	0.75
180	F	59	married	secondary	unemployed	less activity	1,000－9,999元	Urban medical insurance	≥30	yes	<1	no	156cm	72kg	no	yes	no	unclear	no	yes	yes	no	1－2	once	0	Yes	yes	no	no	no	yes	no	yes	1
181	F	65	married	primary	unemployed	less activity	1,000－9,999元	Urban medical insurance	<30	yes	≥10	yes	158cm	75kg	yes	yes	yes	no	no	no	no	no	1－2	quartic	1	Yes	no	no	no	no	yes	no	no	1
182	M	44	married	secondary	employed	less activity	1,000－9,999元	Urban medical insurance	≥30	yes	≥10	no	170cm	75kg	no	unclear	yes	yes	yes	yes	yes	unclear	1－2	quartic	1	Yes	yes	yes	yes	no	yes	no	no	0.5
183	F	54	married	secondary	unemployed	less activity	1,000－9,999元	Urban medical insurance	<30	yes	≥10	yes	160cm	65kg	no	yes	no	unclear	yes	yes	no	unclear	1－2	quartic	1	Yes	no	no	no	no	yes	no	no	1
184	F	63	married	primary	unemployed	less activity	1,000－9,999元	Urban medical insurance	<30	yes	<1	no	157cm	49kg	no	yes	unclear	no	yes	yes	no	no	3	thrice	0	Yes	no	no	no	no	yes	yes	no	1
185	F	65	married	secondary	unemployed	less activity	1,000－9,999元	Urban medical insurance	<30	yes	1_5	no	150cm	68kg	no	yes	yes	no	yes	yes	yes	yes	4－5	quartic	≥3	no	yes	yes	no	no	yes	no	no	0.5
186	F	51	single	primary	unemployed	less activity	1,000－9,999元	Rural cooperative medical care	<30	yes	≥10	no	153cm	54kg	no	yes	yes	yes	yes	yes	yes	no	≥6	quartic	2	no	yes	no	no	yes	yes	no	no	0.75
187	M	58	married	secondary	employed	light-to-moderate activity	1,000－9,999元	Urban medical insurance	<30	yes	1_5	yes	172cm	70kg	no	yes	no	yes	yes	yes	yes	yes	4－5	quartic	0	Yes	yes	no	no	yes	yes	no	no	0.75
188	F	44	married	secondary	employed	light-to-moderate activity	1,000－9,999元	Urban medical insurance	<30	yes	<1	yes	161cm	63kg	no	yes	no	yes	no	no	no	no	1－2	quartic	2	Yes	yes	no	yes	no	yes	yes	no	0.75
189	F	55	married	secondary	unemployed	less activity	1,000－9,999元	Urban medical insurance	<30	yes	≥10	no	165cm	76kg	no	yes	yes	no	yes	no	no	no	≥6	quartic	2	Yes	yes	yes	no	yes	yes	no	yes	0.75
190	F	58	married	primary	unemployed	less activity	1,000－9,999元	Urban medical insurance	<30	yes	≥10	yes	150cm	58kg	yes	yes	yes	no	yes	yes	yes	no	≥6	quartic	0	Yes	yes	no	no	yes	yes	no	no	1
191	M	54	married	primary	unemployed	light-to-moderate activity	1,000－9,999元	Rural cooperative medical care	<30	no	≥10	no	172cm	70kg	no	yes	yes	yes	yes	no	yes	no	≥6	quartic	0	Yes	yes	no	no	yes	yes	no	no	0.75
192	F	73	single	primary	unemployed	less activity	1,000－9,999元	Rural cooperative medical care	<30	yes	1_5	no	160cm	62.5kg	no	yes	no	no	yes	yes	yes	no	4－5	quartic	2	Yes	yes	no	no	no	yes	no	no	1
193	F	65	married	primary	unemployed	less activity	1,000－9,999元	Urban medical insurance	<30	no	≥10	no	164cm	62kg	no	yes	yes	no	yes	no	no	no	1－2	quartic	2	Yes	yes	no	no	no	yes	no	yes	0.75
194	M	39	married	secondary	employed	light-to-moderate activity	1,000－9,999元	Urban medical insurance	<30	yes	1_5年	no	178cm	81kg	no	yes	no	unclear	no	yes	yes	no	1－2	twice	2	Yes	yes	yes	yes	yes	yes	yes	no	0.25
195	M	50	married	secondary	unemployed	less activity	1,000－9,999元	Urban medical insurance	<30	yes	≥10	yes	180cm	80kg	no	yes	yes	yes	yes	yes	yes	no	4－5	quartic	0	Yes	yes	no	no	yes	yes	no	no	0.75
196	M	59	married	secondary	employed	less activity	1,000－9,999元	Urban medical insurance	<30	yes	≥10	no	170cm	70kg	no	unclear	no	no	yes	no	yes	no	3	thrice	0	Yes	yes	no	yes	yes	no	yes	no	0
197	M	65	married	secondary	unemployed	less activity	1,000－9,999元	Urban medical insurance	<30	yes	≥10	no	177cm	75kg	yes	yes	no	yes	yes	yes	yes	no	≥6	quartic	0	Yes	no	no	no	no	yes	no	no	1
198	M	49	married	secondary	unemployed	less activity	1,000－9,999元	Urban medical insurance	<30	yes	5-10	no	167cm	73kg	no	yes	no	yes	yes	yes	no	yes	4－5	quartic	2	Yes	yes	yes	yes	yes	yes	no	yes	0.75
199	M	69	married	primary	unemployed	moderate or heavy activity	1,000－9,999元	Rural cooperative medical care	<30	yes	5-10	no	170cm	54kg	no	no	unclear	unclear	no	unclear	no	unclear	3	quartic	1	Yes	yes	yes	yes	yes	yes	yes	no	1
200	F	48	married	secondary	unemployed	less activity	1,000－9,999元	Urban medical insurance	<30	yes	5-10	no	160cm	50kg	no	no	no	unclear	yes	unclear	no	unclear	1－2	thrice	0	Yes	yes	yes	yes	yes	yes	yes	yes	0.5
201	M	45	married	secondary	employed	light-to-moderate activity	1,000－9,999元	Urban medical insurance	<30	yes	5-10	no	165cm	72kg	no	yes	yes	no	no	yes	no	no	3	quartic	1	Yes	yes	no	no	no	yes	no	no	0.75
202	M	33	married	secondary	employed	light-to-moderate activity	1,000－9,999元	Rural cooperative medical care	<30	no	<1	yes	175cm	60kg	no	no	no	no	yes	yes	no	no	4－5	quartic	2	Yes	no	no	no	no	yes	no	yes	1
203	F	74	married	secondary	unemployed	less activity	1,000－9,999元	Urban medical insurance	<30	yes	≥10	yes	164cm	70kg	no	yes	yes	unclear	no	no	yes	no	1－2	quartic	1	Yes	yes	no	no	no	yes	no	no	0.75
204	F	68	married	primary	unemployed	less activity	1,000－9,999元	Urban medical insurance	<30	yes	5-10	no	150cm	55kg	no	yes	unclear	unclear	yes	no	yes	yes	≥6	twice	2	Yes	yes	yes	no	no	yes	no	no	0.75
205	F	66	married	secondary	employed	light-to-moderate activity	1,000－9,999元	Rural cooperative medical care	≥30	yes	≥10	no	156cm	45kg	no	yes	unclear	yes	yes	yes	yes	yes	4－5	thrice	0	Yes	yes	no	no	yes	no	no	no	0.75
206	M	54	married	primary	unemployed	less activity	1,000－9,999元	Rural cooperative medical care	<30	yes	<1	no	173cm	60kg	no	no	no	no	no	yes	no	yes	3种	thrice	0	Yes	no	no	no	no	yes	no	yes	1
207	M	56	married	secondary	employed	light-to-moderate activity	1,000－9,999元	Urban medical insurance	<30	yes	5-10	yes	168cm	70kg	no	yes	no	no	yes	yes	yes	no	4－5	twice	2	Yes	yes	no	yes	yes	yes	yes	no	0.25
208	M	59	married	secondary	employed	light-to-moderate activity	10,000-19,999元	Urban medical insurance	<30	yes	≥10	yes	178cm	85kg	no	yes	yes	no	no	yes	no	unclear	1－2	quartic	1	Yes	yes	no	no	yes	yes	no	no	1
209	M	49	single	secondary	employed	light-to-moderate activity	1,000－9,999元	Urban medical insurance	<30	yes	≥10	yes	175cm	63kg	yes	yes	no	no	yes	yes	yes	yes	≥6	quartic	0	yes	no	no	no	no	yes	no	no	1
210	M	57	married	secondary	employed	light-to-moderate activity	1,000－9,999元	Urban medical insurance	<30	yes	≥10	yes	174cm	68kg	yes	yes	yes	yes	yes	no	yes	yes	3	twice	1	Yes	yes	no	no	yes	yes	no	no	0.5
211	F	65	married	secondary	unemployed	less activity	1,000－9,999元	Urban medical insurance	<30	yes	≥10	yes	160cm	61kg	yes	yes	no	no	yes	no	yes	yes	≥6	once	1	Yes	yes	no	no	yes	yes	no	no	0.75
212	F	56	married	primary	unemployed	moderate or heavy activity	1,000－9,999元	Rural cooperative medical care	<30	yes	≥10	yes	167cm	80kg	no	yes	yes	no	yes	no	no	unclear	1－2	quartic	2	Yes	no	no	no	no	no	no	no	1
213	M	57	married	secondary	employed	light-to-moderate activity	1,000－9,999元	Urban medical insurance	<30	yes	5-10	no	165cm	59kg	no	yes	no	no	no	no	no	no	3	quartic	2	Yes	yes	yes	no	no	yes	no	no	0.75
214	F	69	married	secondary	unemployed	less activity	1,000－9,999元	Urban medical insurance	<30	no	<1	no	158cm	64kg	yes	no	no	unclear	no	no	yes	no	≥6	quartic	2	no	no	no	no	no	yes	no	yes	1
215	M	58	married	secondary	employed	less activity	1,000－9,999元	Urban medical insurance	<30	yes	1_5	yes	168cm	60kg	no	yes	no	no	yes	yes	no	yes	3	quartic	1	Yes	yes	no	yes	yes	yes	no	no	0.75
216	M	70	married	primary	unemployed	less activity	1,000－9,999元	Urban medical insurance	<30	yes	≥10	no	173cm	69.2kg	no	yes	no	no	yes	yes	no	no	4－5	quartic	2	Yes	yes	no	no	yes	yes	no	no	0.75
217	F	51	married	primary	unemployed	less activity	＜1,000元	Rural cooperative medical care	<30	yes	5-10	no	160cm	65kg	unclear	yes	yes	no	yes	yes	no	yes	1－2	quartic	1	Yes	yes	no	no	no	yes	no	no	1
218	M	64	married	primary	unemployed	less activity	＜1,000元	Rural cooperative medical care	<30	yes	≥10	yes	163cm	70kg	yes	yes	yes	no	no	no	yes	no	≥6	quartic	2	Yes	no	no	no	no	yes	no	no	1
219	F	49	married	secondary	employed	light-to-moderate activity	1,000－9,999元	Urban medical insurance	<30	no	1_5	yes	167cm	75kg	no	yes	no	no	no	no	yes	no	1－2	quartic	1	Yes	no	no	no	no	yes	no	no	1
220	F	59	married	secondary	unemployed	less activity	1,000－9,999元	Urban medical insurance	<30	yes	5-10	yes	162cm	62kg	unclear	yes	no	unclear	yes	no	no	unclear	1－2	twice	1	Yes	yes	yes	no	yes	yes	no	no	0.5
221	F	74	married	primary	unemployed	less activity	1,000－9,999元	Urban medical insurance	≥30	yes	≥10	yes	155cm	55kg	no	yes	yes	yes	yes	no	yes	unclear	3	quartic	1	Yes	yes	yes	no	no	yes	no	no	0.25
222	M	58	married	secondary	employed	less activity	1,000－9,999元	Urban medical insurance	<30	yes	≥10	no	176cm	77kg	yes	yes	no	no	yes	yes	no	no	3	thrice	0	Yes	yes	no	no	no	yes	no	no	0.75
223	M	60	married	secondary	unemployed	less activity	1,000－9,999元	Urban medical insurance	<30	no	≥10	no	169cm	80kg	no	yes	yes	unclear	yes	yes	no	no	4－5	quartic	≥3	no	yes	no	no	no	yes	no	no	0.75
224	M	64	married	primary	unemployed	less activity	＜1,000元	Rural cooperative medical care	<30	yes	1_5	no	178cm	75kg	no	yes	no	no	yes	yes	no	no	1－2	quartic	1	Yes	yes	no	yes	yes	yes	no	no	0.75
225	M	29	married	secondary	employed	light-to-moderate activity	1,000－9,999元	Urban medical insurance	<30	yes	<1	no	175cm	82kg	no	no	no	no	no	yes	no	yes	1－2	once	0	Yes	yes	yes	yes	yes	yes	yes	yes	0.25
226	M	52	single	secondary	employed	light-to-moderate activity	1,000－9,999元	Urban medical insurance	<30	yes	≥10	no	175cm	84kg	no	no	no	no	yes	no	no	no	1－2	once	1	Yes	yes	no	no	no	yes	no	no	0.75
227	M	34	married	secondary	employed	moderate or heavy activity	1,000－9,999元	Rural cooperative medical care	<30	yes	5-10	no	175cm	82kg	no	yes	no	no	no	yes	yes	no	3	quartic	≥3	no	yes	no	yes	no	yes	no	no	1
228	F	62	married	primary	unemployed	light-to-moderate activity	＜1,000元	Rural cooperative medical care	<30	no	<1	no	163cm	65kg	no	no	no	no	yes	yes	no	no	1－2	quartic	1	Yes	yes	yes	yes	yes	yes	no	no	0.25
229	M	55	married	secondary	unemployed	less activity	1,000－9,999元	Urban medical insurance	<30	yes	≥10	no	165cm	63kg	no	unclear	no	unclear	no	yes	yes	unclear	1－2	twice	1	Yes	no	no	no	no	yes	no	no	1
230	F	63	single	primary	unemployed	less activity	1,000－9,999元	Urban medical insurance	<30	yes	1_5	no	165cm	70kg	no	yes	no	no	no	unclear	yes	no	1－2	quartic	1	Yes	yes	no	yes	yes	yes	yes	yes	0.5
231	F	56	married	secondary	unemployed	less activity	1,000－9,999元	Urban medical insurance	<30	yes	5-10	no	163cm	70kg	no	yes	no	no	yes	yes	yes	no	≥6	twice	≥3	no	yes	no	no	no	yes	no	yes	0.75
232	M	55	married	secondary	employed	light-to-moderate activity	1,000－9,999元	Urban medical insurance	<30	yes	<1	no	175cm	71kg	no	yes	no	no	no	yes	no	unclear	1－2	quartic	1	Yes	no	no	no	yes	yes	no	yes	1
233	M	54	married	secondary	employed	less activity	1,000－9,999元	Urban medical insurance	<30	no	1_5	yes	170cm	67kg	no	yes	no	no	no	no	yes	unclear	1－2	quartic	2	Yes	yes	no	no	yes	yes	no	no	0.5
234	M	52	married	primary	unemployed	less activity	＜1,000元	Rural cooperative medical care	<30	yes	≥10	no	170cm	88kg	no	no	unclear	no	yes	yes	yes	no	3	quartic	1	Yes	yes	yes	yes	no	yes	no	no	0.5
235	F	56	married	primary	unemployed	less activity	＜1,000元	Rural cooperative medical care	<30	yes	≥10	no	155cm	50kg	no	unclear	unclear	unclear	yes	yes	yes	unclear	3	thrice	0	Yes	no	no	no	no	yes	no	no	1
236	M	50	married	secondary	employed	light-to-moderate activity	1,000－9,999元	Urban medical insurance	<30	no	<1	no	176cm	85kg	no	yes	unclear	no	yes	unclear	no	unclear	1－2	quartic	1	Yes	no	no	no	no	yes	no	no	1
237	M	76	married	primary	unemployed	less activity	1,000－9,999元	Urban medical insurance	<30	no	<1	no	165cm	60kg	unclear	unclear	unclear	unclear	no	no	no	no	1－2	once	0	yes	no	no	no	no	no	no	no	0.75
238	F	74	married	primary	unemployed	less activity	1,000－9,999元	Urban medical insurance	<30	yes	5-10	yes	160cm	72kg	unclear	unclear	yes	unclear	no	yes	yes	no	3	quartic	2	Yes	no	no	no	no	yes	no	no	1
239	M	74	married	primary	unemployed	less activity	1,000－9,999元	Urban medical insurance	<30	yes	≥10	yes	174cm	75kg	yes	yes	no	no	no	no	yes	no	1－2	thrice	0	Yes	yes	yes	no	no	yes	no	no	0.75
240	M	24	single	higher	employed	less activity	1,000－9,999元	self-funded	<30	yes	<1	no	184cm	96.5kg	no	no	no	no	yes	no	no	no	1－2	twice	0	Yes	no	no	no	no	yes	no	no	1
241	M	58	married	secondary	employed	less activity	1,000－9,999元	Urban medical insurance	<30	yes	5-10	no	172cm	85kg	no	yes	yes	unclear	no	no	no	yes	1－2	quartic	1	Yes	yes	yes	no	yes	yes	no	yes	0.5
242	F	42	married	primary	unemployed	less activity	＜1,000元	Rural cooperative medical care	<30	no	<1	yes	158cm	80kg	no	unclear	no	unclear	no	yes	yes	no	3	quartic	1	Yes	yes	yes	yes	yes	no	yes	no	0.25
243	M	65	single	secondary	unemployed	less activity	1,000－9,999元	Urban medical insurance	<30	yes	≥10	no	179cm	75kg	no	unclear	no	unclear	yes	no	no	unclear	1－2	once	0	Yes	yes	yes	no	yes	yes	no	no	0.75
244	M	50	married	secondary	employed	less activity	1,000－9,999元	Rural cooperative medical care	<30	yes	1_5	no	164cm	74kg	no	yes	no	unclear	yes	yes	yes	unclear	3	once	2	Yes	no	yes	no	no	yes	no	no	1
245	M	50	married	secondary	employed	light-to-moderate activity	1,000－9,999元	Urban medical insurance	<30	yes	≥10	no	172cm	72kg	no	yes	no	no	yes	yes	yes	no	1－2	twice	1	Yes	yes	yes	no	no	yes	yes	no	0.5
246	F	58	married	secondary	unemployed	less activity	1,000－9,999元	Urban medical insurance	<30	yes	≥10	yes	155cm	62kg	no	yes	no	unclear	yes	yes	yes	yes	1－2	quartic	1	Yes	yes	no	no	no	yes	no	no	1
247	F	52	married	secondary	unemployed	less activity	1,000－9,999元	Urban medical insurance	<30	yes	1_5	yes	155cm	52kg	no	yes	yes	no	no	yes	no	unclear	1－2	quartic	1	Yes	yes	yes	no	no	yes	no	no	0.5
248	M	63	married	secondary	unemployed	less activity	1,000－9,999元	Urban medical insurance	<30	yes	≥10	no	178cm	82kg	no	yes	no	no	yes	yes	yes	unclear	3	twice	1	Yes	yes	no	no	no	yes	no	no	0.5
249	F	73	married	primary	unemployed	less activity	＜1,000元	Rural cooperative medical care	<30	yes	≥10	yes	150cm	71kg	no	yes	yes	yes	yes	unclear	yes	yes	4－5	once	1	Yes	yes	no	no	no	yes	no	no	1
250	F	71	married	primary	unemployed	less activity	＜1,000元	Rural cooperative medical care	<30	no	≥10	no	158cm	62.5kg	no	yes	yes	yes	yes	yes	no	unclear	≥6	once	2	Yes	yes	no	no	no	yes	no	no	0.5
251	M	50	married	secondary	employed	light-to-moderate activity	1,000－9,999元	Urban medical insurance	<30	no	5-10	no	169cm	80kg	yes	yes	yes	no	yes	yes	yes	yes	4－5	quartic	≥3	no	yes	yes	no	yes	yes	yes	yes	0.75
252	M	63	married	secondary	unemployed	less activity	1,000－9,999元	Urban medical insurance	<30	yes	≥10	yes	168cm	73kg	yes	yes	yes	no	yes	no	yes	no	≥6	quartic	2	no	no	no	no	no	yes	no	no	1
253	M	55	married	primary	unemployed	less activity	1,000－9,999元	Urban medical insurance	<30	yes	≥10	no	165cm	80kg	no	yes	yes	no	yes	yes	no	no	4－5	quartic	≥3	no	yes	no	yes	yes	yes	no	no	0.75
254	M	51	married	secondary	employed	light-to-moderate activity	1,000－9,999元	Urban medical insurance	<30	yes	1_5	yes	165cm	64kg	yes	yes	no	unclear	yes	yes	no	unclear	1－2	twice	1	Yes	no	no	no	no	yes	no	no	1
255	F	67	single	secondary	unemployed	less activity	1,000－9,999元	Urban medical insurance	<30	yes	≥10	no	158cm	72.5kg	no	yes	unclear	unclear	no	yes	yes	unclear	4－5	twice	1	Yes	no	no	no	yes	yes	no	no	1
256	M	59	married	secondary	unemployed	less activity	1,000－9,999元	Urban medical insurance	<30	yes	≥10	yes	169cm	67kg	no	yes	no	unclear	no	no	no	unclear	1－2	twice	2	Yes	no	no	no	no	yes	no	no	1
257	M	56	married	secondary	employed	light-to-moderate activity	10,000-19,999元	Urban medical insurance	<30	yes	≥10	yes	175cm	78kg	no	yes	no	no	yes	no	no	unclear	1－2	once	1	Yes	yes	yes	yes	yes	no	yes	yes	0.25
258	M	54	married	secondary	employed	less activity	1,000－9,999元	Urban medical insurance	<30	yes	≥10	yes	173cm	75kg	no	yes	yes	unclear	no	unclear	yes	no	1－2	once	0	Yes	yes	no	no	yes	yes	no	no	0.5
259	M	63	married	secondary	unemployed	less activity	1,000－9,999元	Urban medical insurance	<30	yes	<1	no	170cm	74kg	no	yes	yes	unclear	no	no	no	yes	1－2	quartic	0	Yes	yes	yes	no	no	yes	no	yes	1
260	M	45	married	secondary	employed	less activity	1,000－9,999元	Urban medical insurance	<30	yes	5-10	no	165cm	76kg	unclear	yes	unclear	unclear	yes	yes	no	yes	3	quartic	2	Yes	yes	no	no	yes	yes	no	yes	0.25
261	F	73	married	primary	unemployed	less activity	1,000－9,999元	Urban medical insurance	<30	yes	≥10	no	165cm	75kg	yes	yes	yes	yes	yes	yes	yes	unclear	≥6	quartic	2	no	no	no	no	no	yes	no	no	1
262	F	62	married	secondary	employed	light-to-moderate activity	1,000－9,999元	Urban medical insurance	<30	yes	≥10	yes	154cm	57.5	no	yes	no	unclear	yes	unclear	no	unclear	1－2	quartic	1	Yes	yes	yes	no	no	yes	no	yes	0.25
263	M	60	married	higher	unemployed	less activity	1,000－9,999元	Urban medical insurance	≥30	yes	5-10	no	170cm	90kg	no	yes	yes	unclear	yes	yes	yes	yes	4－5	twice	2	Yes	yes	no	no	yes	yes	no	no	0.75
264	M	71	married	secondary	unemployed	less activity	1,000－9,999元	Urban medical insurance	<30	yes	≥10	no	180cm	82.5kg	yes	yes	no	yes	yes	yes	yes	no	≥6	quartic	1	Yes	yes	no	no	no	yes	no	yes	0.75
265	F	66	married	secondary	unemployed	less activity	1,000－9,999元	Urban medical insurance	<30	yes	5-10	yes	158cm	77kg	no	yes	no	yes	no	yes	yes	unclear	3	quartic	1	Yes	no	yes	no	no	yes	no	yes	1
266	F	58	married	secondary	unemployed	light-to-moderate activity	1,000－9,999元	Rural cooperative medical care	≥30	yes	<1	no	165cm	55kg	yes	unclear	no	yes	no	unclear	no	unclear	4－5	quartic	0	Yes	no	no	no	no	yes	no	yes	1
267	M	65	married	secondary	unemployed	less activity	1,000－9,999元	Urban medical insurance	≥30	yes	5-10	no	178cm	76kg	no	unclear	yes	yes	yes	no	no	no	1－2	twice	1	Yes	yes	no	no	no	yes	no	no	0.75
268	M	62	single	secondary	unemployed	less activity	1,000－9,999元	Urban medical insurance	<30	yes	≥10	yes	179cm	88kg	yes	yes	yes	unclear	yes	no	yes	unclear	4－5	quartic	1	Yes	yes	no	no	no	yes	no	no	1
269	M	70	married	secondary	unemployed	less activity	1,000－9,999元	Urban medical insurance	<30	no	≥10	no	174cm	90kg	no	no	no	unclear	yes	yes	yes	unclear	1－2	once	0	yes	no	no	no	no	yes	no	no	1
270	M	43	married	secondary	employed	less activity	1,000－9,999元	Urban medical insurance	<30	yes	1_5	no	170cm	80kg	no	no	no	unclear	no	yes	no	no	1－2	thrice	0	Yes	no	no	no	no	yes	no	yes	1
271	M	29	married	higher	employed	light-to-moderate activity	1,000－9,999元	Urban medical insurance	≥30	yes	<1	no	170cm	87kg	no	no	no	no	no	yes	no	yes	1－2	once	0	Yes	yes	yes	yes	yes	no	yes	no	0
272	F	59	married	primary	employed	light-to-moderate activity	1,000－9,999元	Rural cooperative medical care	<30	yes	≥10	yes	170cm	69kg	no	no	yes	unclear	no	no	yes	unclear	3	quartic	≥3	no	yes	no	no	yes	yes	no	no	0.75
273	F	65	married	secondary	unemployed	less activity	1,000－9,999元	Urban medical insurance	<30	yes	5-10	no	163cm	70kg	no	yes	no	no	no	yes	yes	unclear	3	quartic	2	Yes	yes	yes	no	yes	yes	no	no	1
274	M	47	married	secondary	employed	light-to-moderate activity	1,000－9,999元	Urban medical insurance	<30	yes	≥10	yes	170cm	68.5kg	no	yes	yes	no	no	yes	yes	no	3	quartic	2	Yes	yes	no	no	yes	yes	no	no	0.5
275	F	70	married	secondary	unemployed	less activity	1,000－9,999元	Urban medical insurance	<30	yes	≥10	no	165cn	61kg	no	yes	yes	unclear	yes	no	yes	unclear	4－5	quartic	2	Yes	yes	no	no	no	yes	no	no	1
276	M	64	married	secondary	unemployed	less activity	1,000－9,999元	Urban medical insurance	<30	yes	<1	no	160cm	60kg	no	yes	unclear	unclear	no	yes	no	no	1－2	quartic	2	Yes	yes	yes	yes	no	yes	yes	yes	0.25
277	F	71	married	primary	unemployed	less activity	＜1,000元	Rural cooperative medical care	<30	yes	<1	no	160cm	51kg	no	yes	no	unclear	no	yes	yes	unclear	1－2	thrice	0	Yes	no	no	no	no	yes	no	yes	1
278	M	31	single	higher	employed	light-to-moderate activity	1,000－9,999元	Rural cooperative medical care	<30	yes	5-10	no	176cm	60kg	no	no	no	unclear	no	no	no	no	1－2	once	0	Yes	yes	yes	yes	yes	yes	yes	no	0.25
279	F	55	married	secondary	unemployed	less activity	1,000－9,999元	Urban medical insurance	<30	no	<1	yes	158cm	67kg	no	no	no	unclear	yes	no	yes	no	1－2	quartic	2	Yes	yes	no	no	yes	yes	no	no	0.75
280	F	56	married	secondary	unemployed	light-to-moderate activity	1,000－9,999元	Urban medical insurance	<30	yes	≥10	no	160cm	49.5kg	no	yes	yes	unclear	no	yes	no	unclear	1－2	once	0	Yes	no	no	no	yes	yes	no	no	1
281	F	61	married	secondary	unemployed	less activity	1,000－9,999元	Urban medical insurance	<30	no	5-10	no	164cm	54kg	no	yes	yes	yes	yes	no	no	unclear	1－2	once	1	Yes	yes	no	no	yes	yes	no	no	0.75
282	M	62	married	secondary	unemployed	less activity	1,000－9,999元	Urban medical insurance	<30	yes	≥10	no	176cm	70kg	no	yes	yes	no	yes	no	yes	no	4－5	quartic	2	Yes	yes	no	yes	no	yes	no	no	0.75
283	F	63	single	primary	unemployed	less activity	1,000－9,999元	Urban medical insurance	<30	yes	≥10	no	164cm	60kg	no	yes	no	unclear	yes	yes	yes	unclear	3	thrice	0	Yes	no	no	no	no	yes	no	no	1
284	F	77	married	secondary	unemployed	less activity	1,000－9,999元	Urban medical insurance	<30	yes	≥10	yes	158cm	60kg	yes	yes	unclear	unclear	yes	yes	yes	unclear	≥6	once	1	Yes	yes	no	no	no	yes	no	no	0.75
285	M	73	married	secondary	unemployed	less activity	1,000－9,999元	Urban medical insurance	<30	no	<1	no	165cm	74.5kg	yes	yes	yes	unclear	no	no	no	unclear	1－2	quartic	1	Yes	no	no	no	no	yes	no	yes	1
286	F	57	married	primary	unemployed	light-to-moderate activity	1,000－9,999元	self-funded	<30	yes	≥10	no	163cm	69kg	no	yes	no	no	yes	no	no	no	1－2	once	2	Yes	yes	yes	no	yes	no	no	no	0.75
287	F	64	married	secondary	unemployed	less activity	1,000－9,999元	Urban medical insurance	<30	yes	≥10	yes	162cm	65kg	no	yes	unclear	unclear	yes	no	no	unclear	1－2	quartic	2	Yes	yes	yes	yes	yes	yes	yes	no	0.5
288	F	79	married	primary	unemployed	less activity	1,000－9,999元	Urban medical insurance	<30	no	<1	yes	160cm	56kg	no	yes	unclear	yes	no	no	yes	yes	4－5	quartic	0	Yes	no	no	no	no	yes	no	no	1
289	F	64	married	primary	unemployed	less activity	1,000－9,999元	Urban medical insurance	<30	yes	≥10	yes	163cm	60kg	no	yes	no	no	no	yes	yes	unclear	≥6	quartic	2	Yes	no	no	no	no	yes	no	no	1
290	F	54	married	primary	unemployed	less activity	1,000－9,999元	Urban medical insurance	<30	yes	≥10	no	165cm	59kg	no	yes	no	no	yes	yes	yes	yes	1－2	once	1	Yes	yes	yes	yes	no	yes	no	no	0.75
291	M	57	married	secondary	employed	light-to-moderate activity	1,000－9,999元	Urban medical insurance	<30	yes	≥10	no	169cm	72kg	no	no	yes	unclear	yes	no	no	no	1－2	once	0	Yes	no	no	yes	yes	yes	no	no	1
292	F	58	married	primary	unemployed	less activity	＜1,000元	Rural cooperative medical care	<30	yes	≥10	no	155cm	55kg	no	yes	no	unclear	yes	no	no	unclear	4－5	thrice	0	Yes	yes	no	yes	no	yes	no	no	0.75
293	M	54	married	primary	unemployed	light-to-moderate activity	1,000－9,999元	Rural cooperative medical care	<30	yes	≥10	no	168cm	65kg	no	yes	no	no	yes	no	no	no	1－2	once	2	Yes	yes	no	no	yes	yes	no	no	0.75
294	F	48	married	primary	unemployed	light-to-moderate activity	1,000－9,999元	Rural cooperative medical care	<30	yes	≥10	no	170cm	65kg	no	no	no	no	yes	no	no	no	1－2	thrice	0	Yes	yes	no	no	no	yes	no	yes	0.75
295	M	61	single	secondary	unemployed	less activity	1,000－9,999元	Urban medical insurance	<30	yes	≥10	no	170cm	65kg	no	yes	no	no	no	no	no	no	1－2	quartic	2	no	yes	yes	yes	yes	yes	no	no	0.25
296	M	63	married	secondary	unemployed	less activity	1,000－9,999元	Urban medical insurance	<30	yes	1_5	no	170cm	70kg	no	no	no	no	no	no	no	no	1－2	once	0	Yes	no	no	no	no	no	no	no	1
297	M	22	single	higher	unemployed	less activity	＜1,000元	Rural cooperative medical care	<30	no	5-10	yes	181cm	85kg	no	no	yes	yes	no	no	no	yes	1－2	once	1	Yes	yes	no	no	no	yes	yes	yes	1
298	F	68	married	primary	employed	less activity	＜1,000元	Urban medical insurance	≥30	yes	≥10	yes	165cm	68kg	yes	yes	no	no	yes	no	yes	no	3	once	1	Yes	yes	no	no	no	yes	no	no	0.75
299	F	62	married	secondary	unemployed	light-to-moderate activity	1,000－9,999元	Urban medical insurance	<30	yes	1_5	yes	168cm	63kg	no	no	no	no	yes	no	yes	yes	3	once	2	Yes	yes	yes	yes	yes	yes	no	no	0.5
300	M	62	married	primary	unemployed	less activity	＜1,000元	Rural cooperative medical care	<30	yes	≥10	yes	168cm	70kg	no	yes	no	no	yes	yes	yes	no	3	once	0	yes	yes	no	no	yes	yes	no	no	1
301	F	72	married	secondary	unemployed	less activity	1,000－9,999元	Urban medical insurance	<30	yes	≥10	no	150cm	54kg	no	yes	yes	yes	yes	no	no	unclear	1－2	thrice	0	Yes	yes	no	no	no	yes	no	no	1
302	M	62	married	secondary	unemployed	less activity	1,000－9,999元	Urban medical insurance	<30	yes	≥10	yes	175cm	93kg	yes	yes	no	yes	yes	yes	yes	unclear	≥6	twice	1	Yes	yes	no	no	yes	yes	no	no	1
303	M	56	married	primary	unemployed	less activity	1,000－9,999元	Urban medical insurance	<30	yes	<1	yes	165cm	78kg	no	no	no	no	no	no	no	no	1－2	quartic	1	Yes	no	no	no	no	yes	no	yes	1
304	M	47	married	secondary	employed	light-to-moderate activity	1,000－9,999元	Urban medical insurance	<30	yes	5-10	yes	178cm	90kg	no	yes	unclear	yes	no	no	no	no	1－2	twice	1	Yes	yes	yes	no	yes	yes	no	no	0.75
305	M	36	married	higher	employed	light-to-moderate activity	1,000－9,999元	Urban medical insurance	<30	no	<1	no	168cm	70kg	no	yes	no	unclear	no	yes	no	no	3	quartic	1	Yes	no	no	no	no	yes	no	yes	1
306	M	30	single	higher	employed	light-to-moderate activity	1,000－9,999元	Urban medical insurance	<30	yes	5-10	no	172cm	84kg	no	yes	no	unclear	no	yes	no	no	1－2	once	1	Yes	yes	no	yes	yes	no	yes	yes	0.25
307	M	63	single	secondary	unemployed	less activity	1,000－9,999元	Urban medical insurance	<30	yes	1_5	yes	175cm	70kg	no	yes	no	no	yes	yes	no	unclear	1－2	quartic	1	Yes	no	no	no	no	yes	no	no	1
308	F	71	married	primary	unemployed	less activity	1,000－9,999元	Urban medical insurance	<30	no	≥10	no	158cm	60kg	yes	yes	yes	no	yes	no	yes	unclear	≥6	quartic	1	Yes	yes	no	no	no	yes	no	no	1
309	M	55	married	primary	employed	light-to-moderate activity	1,000－9,999元	Urban medical insurance	<30	yes	≥10	no	176cm	72kg	no	no	no	unclear	yes	yes	no	unclear	1－2	twice	2	Yes	yes	no	yes	no	yes	yes	no	0.25
310	M	51	married	primary	employed	light-to-moderate activity	1,000－9,999元	Rural cooperative medical care	≥30	yes	≥10	no	173cm	90kg	no	yes	yes	unclear	yes	no	no	no	1－2	twice	1	Yes	yes	no	no	yes	yes	no	no	0.75
311	M	42	married	secondary	employed	less activity	1,000－9,999元	Urban medical insurance	<30	yes	<1	yes	172cm	95kg	no	no	no	unclear	yes	yes	yes	unclear	1－2	thrice	0	Yes	no	no	no	no	yes	no	no	1
312	M	46	married	secondary	employed	light-to-moderate activity	1,000－9,999元	Urban medical insurance	<30	yes	≥10	yes	186cm	98kg	no	yes	no	no	yes	yes	no	yes	1－2	quartic	1	Yes	no	no	no	yes	yes	no	no	1
313	M	33	married	secondary	employed	heavy activity	1,000－9,999元	Urban medical insurance	<30	no	1_5	yes	174cm	77kg	no	no	yes	no	no	yes	no	yes	3	twice	1	Yes	yes	no	yes	yes	yes	yes	yes	0.25
314	F	34	married	primary	employed	heavy activity	1,000－9,999元	self-funded	<30	yes	5-10	no	156cm	56kg	no	yes	no	yes	no	yes	no	yes	1－2	thrice	0	Yes	no	no	yes	no	yes	no	yes	1
315	F	64	married	primary	unemployed	less activity	＜1,000元	Rural cooperative medical care	<30	yes	5-10	no	156cm	50kg	no	no	no	no	yes	no	no	no	3	once	1	Yes	yes	no	no	no	yes	no	no	0.75
316	F	77	married	secondary	unemployed	less activity	1,000－9,999元	Urban medical insurance	<30	no	≥10	no	160cm	62.5kg	no	yes	yes	no	no	no	yes	yes	1－2	thrice	1	Yes	yes	yes	no	yes	yes	no	no	1
317	F	61	married	primary	unemployed	less activity	1,000－9,999元	Urban medical insurance	<30	yes	≥10	yes	155cm	66kg	no	unclear	unclear	unclear	yes	yes	no	unclear	1－2	twice	0	yes	yes	yes	no	no	yes	no	no	0.75
318	F	65	married	secondary	unemployed	less activity	1,000－9,999元	Urban medical insurance	<30	yes	≥10	no	168cm	71kg	no	no	no	unclear	yes	no	yes	yes	1－2	once	0	Yes	yes	no	no	yes	yes	no	no	1
319	M	44	married	secondary	employed	less activity	1,000－9,999元	Urban medical insurance	<30	yes	5-10	no	173.5cm	73kg	no	no	no	unclear	no	yes	no	no	1－2	once	0	Yes	yes	yes	no	yes	yes	no	no	0
320	M	61	married	secondary	unemployed	less activity	1,000－9,999元	Urban medical insurance	<30	yes	≥10	no	168cm	74kg	yes	yes	no	yes	yes	unclear	yes	unclear	≥6	quartic	0	yes	no	no	no	no	yes	no	no	1
321	M	72	married	primary	unemployed	light-to-moderate activity	1,000－9,999元	Urban medical insurance	<30	yes	≥10	no	170cn	67kg	unclear	yes	yes	yes	yes	yes	yes	no	4－5	thrice	1	Yes	no	no	no	no	yes	no	no	1
322	F	64	married	primary	unemployed	less activity	＜1,000元	Rural cooperative medical care	<30	yes	≥10	yes	162cm	65kg	no	unclear	unclear	unclear	yes	no	no	unclear	1－2	thrice	0	Yes	no	no	no	no	yes	no	no	1
323	M	57	married	secondary	employed	light-to-moderate activity	1,000－9,999元	Urban medical insurance	<30	yes	1_5	no	172cm	73kg	no	no	no	yes	no	no	no	no	1－2	thrice	2	Yes	yes	yes	no	yes	yes	no	no	0.5
324	F	77	single	primary	unemployed	less activity	1,000－9,999元	Urban medical insurance	<30	yes	≥10	yes	154cm	50kg	no	unclear	no	unclear	no	no	no	unclear	1－2	twice	1	Yes	yes	no	no	no	yes	no	no	0.75
325	F	74	married	primary	unemployed	less activity	1,000－9,999元	Urban medical insurance	<30	yes	≥10	no	160cn	60kg	no	yes	yes	unclear	yes	no	yes	unclear	3	thrice	0	Yes	no	no	no	no	yes	no	no	1
326	M	77	married	primary	unemployed	less activity	1,000－9,999元	Urban medical insurance	<30	yes	≥10	no	168cm	67.5kg	no	yes	yes	unclear	yes	yes	no	unclear	1－2	thrice	1	Yes	yes	no	no	no	yes	no	yes	0.75
327	M	69	married	secondary	unemployed	less activity	1,000－9,999元	Urban medical insurance	<30	yes	≥10	yes	168cm	65kg	no	yes	no	no	yes	unclear	yes	no	1－2	thrice	0	Yes	no	no	no	no	no	no	no	1
328	F	57	single	secondary	employed	less activity	1,000－9,999元	Urban medical insurance	<30	yes	≥10	yes	162cm	71kg	no	no	no	unclear	yes	no	no	unclear	1－2	thrice	2	no	yes	no	no	yes	yes	no	no	0.75
329	M	45	married	secondary	employed	light-to-moderate activity	1,000－9,999元	Urban medical insurance	<30	yes	≥10	yes	168cm	78kg	no	yes	yes	unclear	yes	no	no	unclear	1－2	thrice	1	Yes	yes	yes	no	no	yes	no	no	0.75
330	F	55	married	secondary	unemployed	less activity	1,000－9,999元	Urban medical insurance	<30	yes	≥10	no	169cm	83kg	no	no	yes	no	no	no	yes	no	3	twice	0	yes	yes	yes	no	no	yes	no	no	1
331	F	48	married	secondary	employed	less activity	1,000－9,999元	Urban medical insurance	<30	yes	≥10	yes	162cm	64kg	no	yes	yes	unclear	yes	yes	no	yes	1－2	twice	1	Yes	yes	no	yes	no	yes	no	yes	0.5
332	F	32	married	secondary	unemployed	light-to-moderate activity	1,000－9,999元	Rural cooperative medical care	<30	yes	1_5	no	157cm	49kg	no	no	no	no	no	no	no	no	1－2	once	0	Yes	no	no	no	no	yes	no	no	1
333	M	64	married	secondary	unemployed	less activity	1,000－9,999元	Urban medical insurance	<30	yes	≥10	no	173cm	75kg	yes	yes	yes	unclear	yes	no	yes	no	≥6	thrice	2	Yes	yes	no	no	no	yes	no	no	0.75
334	F	50	married	primary	unemployed	less activity	＜1,000元	Rural cooperative medical care	≥30	no	≥10	no	160cm	58kg	no	yes	yes	unclear	yes	no	yes	unclear	1－2	thrice	0	Yes	no	no	no	no	yes	no	yes	1
335	F	66	married	primary	unemployed	light-to-moderate activity	1,000－9,999元	Rural cooperative medical care	≥30	yes	5-10	no	163cm	70kg	no	no	yes	unclear	yes	yes	yes	unclear	4－5	once	1	Yes	yes	yes	no	yes	yes	no	no	0
336	F	79	married	secondary	unemployed	light-to-moderate activity	1,000－9,999元	Urban medical insurance	<30	yes	≥10	yes	163cm	65kg	yes	yes	yes	no	yes	no	no	no	4－5	thrice	1	Yes	yes	no	no	no	yes	no	no	0.25
337	M	32	married	secondary	employed	light-to-moderate activity	1,000－9,999元	Rural cooperative medical care	<30	yes	1_5	no	175cm	55kg	no	no	no	unclear	no	no	no	no	1－2	once	0	Yes	yes	yes	yes	no	yes	yes	no	1
338	M	41	married	primary	unemployed	light-to-moderate activity	1,000－9,999元	Rural cooperative medical care	<30	yes	5-10	no	180cm	99kg	no	no	no	unclear	yes	yes	no	yes	1－2	thrice	1	Yes	yes	no	no	yes	yes	no	no	0.75
339	M	73	married	primary	unemployed	light-to-moderate activity	1,000－9,999元	Rural cooperative medical care	<30	yes	1_5	no	158cm	75kg	no	yes	yes	no	no	no	no	no	1－2	thrice	2	Yes	yes	no	no	no	yes	no	no	0.75
340	F	67	married	primary	unemployed	less activity	＜1,000元	Rural cooperative medical care	<30	yes	≥10	no	165cm	70kg	no	yes	no	no	yes	no	yes	yes	4－5	thrice	2	Yes	yes	no	no	no	yes	no	no	0.75
341	M	56	married	secondary	unemployed	less activity	1,000－9,999元	Urban medical insurance	<30	yes	≥10	yes	175cm	93kg	yes	yes	yes	unclear	yes	no	no	yes	4－5	thrice	2	Yes	yes	no	no	yes	yes	no	no	0.75
342	M	44	married	secondary	employed	heavy activity	1,000－9,999元	Urban medical insurance	<30	yes	≥10	yes	176cm	68kg	no	yes	yes	unclear	yes	yes	no	yes	1－2	thrice	2	Yes	no	no	no	yes	yes	no	yes	1
343	M	66	single	primary	unemployed	light-to-moderate activity	＜1,000元	Rural cooperative medical care	<30	yes	5-10	yes	165cm	76kg	unclear	yes	yes	no	yes	no	yes	unclear	3	once	1	Yes	yes	no	no	yes	yes	no	no	0.75
344	M	58	married	primary	unemployed	less activity	＜1,000元	Rural cooperative medical care	<30	no	5-10	no	166cm	62kg	no	yes	no	unclear	yes	no	no	no	1－2	thrice	≥3	no	yes	yes	yes	no	yes	yes	yes	1
345	F	63	married	primary	unemployed	less activity	1,000－9,999元	Urban medical insurance	<30	yes	≥10	no	160cm	80kg	no	unclear	unclear	no	yes	yes	no	no	1－2	once	0	Yes	no	no	no	no	yes	no	no	1
346	M	63	single	primary	employed	light-to-moderate activity	1,000－9,999元	Urban medical insurance	<30	yes	≥10	yes	170cm	59kg	no	no	yes	unclear	yes	unclear	no	unclear	1－2	thrice	1	Yes	yes	yes	yes	no	yes	yes	yes	0.25
347	F	70	married	primary	unemployed	less activity	1,000－9,999元	Urban medical insurance	<30	yes	5-10	yes	162cm	64kg	no	yes	yes	no	no	yes	no	no	1－2	thrice	1	Yes	no	no	no	no	yes	no	no	1
348	F	65	married	secondary	unemployed	less activity	1,000－9,999元	Urban medical insurance	<30	yes	1_5	yes	170cm	75kg	no	no	yes	no	no	no	no	no	1－2	thrice	1	Yes	yes	no	no	yes	yes	no	no	0.75
349	M	56	married	secondary	employed	less activity	1,000－9,999元	Rural cooperative medical care	<30	no	<1	no	180cm	100kg	no	no	no	unclear	yes	yes	yes	no	3	thrice	0	Yes	no	no	no	no	yes	no	no	1
350	M	34	married	primary	employed	less activity	1,000－9,999元	Rural cooperative medical care	<30	yes	<1	no	177cm	77kg	no	no	unclear	unclear	yes	no	no	yes	1－2	once	0	Yes	no	no	no	no	no	yes	no	1
351	F	47	married	secondary	employed	less activity	1,000－9,999元	Urban medical insurance	<30	no	≥10	yes	172cm	67kg	no	no	no	unclear	no	no	no	no	1－2	thrice	0	Yes	no	no	no	yes	yes	no	yes	0.75
352	F	65	married	secondary	unemployed	light-to-moderate activity	1,000－9,999元	Urban medical insurance	<30	yes	≥10	yes	161cm	54kg	no	yes	unclear	unclear	yes	no	yes	no	3	twice	2	no	yes	no	no	yes	yes	no	no	1
353	M	65	married	secondary	unemployed	less activity	1,000－9,999元	Urban medical insurance	<30	yes	≥10	yes	171cm	76kg	no	yes	no	unclear	yes	yes	yes	unclear	1－2	twice	2	Yes	yes	yes	yes	yes	yes	yes	yes	0.25
354	F	61	married	secondary	unemployed	less activity	1,000－9,999元	Urban medical insurance	<30	yes	<1	no	160cm	65kg	no	yes	no	no	no	yes	no	yes	3	twice	0	Yes	yes	no	no	no	no	no	no	1
355	F	56	married	secondary	unemployed	less activity	1,000－9,999元	Urban medical insurance	<30	yes	5-10	no	165cm	70kg	no	yes	unclear	unclear	yes	no	yes	yes	≥6	twice	2	Yes	no	no	no	no	yes	yes	no	0.5
356	M	62	married	primary	employed	less activity	1,000－9,999元	Urban medical insurance	<30	yes	5-10	yes	168cm	56kg	no	no	no	unclear	no	yes	no	no	1－2	thrice	1	Yes	yes	no	no	yes	yes	no	no	0.75
357	M	54	single	secondary	employed	less activity	1,000－9,999元	Urban medical insurance	<30	yes	5-10	no	175cm	75kg	yes	yes	no	no	no	yes	yes	no	4－5	thrice	1	Yes	yes	no	no	no	yes	no	yes	0.75
358	M	33	married	secondary	employed	less activity	1,000－9,999元	Rural cooperative medical care	<30	no	<1	no	171cm	64kg	no	no	unclear	unclear	no	yes	no	no	3	twice	2	yes	yes	no	no	yes	yes	yes	yes	0.75
359	M	73	married	secondary	unemployed	less activity	1,000－9,999元	Urban medical insurance	<30	yes	≥10	no	160cm	69kg	no	no	yes	unclear	yes	unclear	no	unclear	1－2	twice	1	Yes	yes	no	no	no	yes	no	no	1
360	F	62	married	secondary	unemployed	less activity	1,000－9,999元	Urban medical insurance	<30	yes	5-10	yes	164cm	56kg	no	yes	no	unclear	no	no	yes	no	1－2	once	1	Yes	yes	no	no	no	yes	no	no	0.75
361	F	58	married	secondary	employed	light-to-moderate activity	1,000－9,999元	Urban medical insurance	<30	yes	5-10	no	170cm	82kg	yes	yes	no	yes	yes	yes	yes	no	4-5	quartic	0	yes	yes	no	no	no	yes	no	no	0.75
362	M	52	married	secondary	unemployed	less activity	1,000－9,999元	Urban medical insurance	<30	yes	5-10	yes	174cm	66kg	yes	yes	no	yes	yes	yes	no	no	1－2	once	2	Yes	no	no	no	no	yes	no	no	1
363	M	63	married	secondary	unemployed	less activity	1,000－9,999元	Urban medical insurance	<30	yes	1_5	no	170cm	70kg	no	no	no	no	no	no	no	no	1－2	once	0	Yes	no	no	no	no	no	no	no	1
364	M	46	married	secondary	employed	light-to-moderate activity	1,000－9,999元	Urban medical insurance	<30	yes	1_5	yes	175cm	90kg	no	yes	no	unclear	yes	no	no	no	1－2	thrice	0	yes	yes	yes	no	yes	yes	no	no	1
365	M	63	married	secondary	unemployed	less activity	1,000－9,999元	Urban medical insurance	<30	yes	≥10	no	175cm	65kg	unclear	yes	yes	no	no	no	no	unclear	1－2	thrice	0	Yes	no	no	no	no	no	no	no	1
366	M	46	married	secondary	employed	light-to-moderate activity	1,000－9,999元	Urban medical insurance	<30	yes	<1	yes	175cm	77kg	no	no	yes	unclear	yes	yes	yes	no	1－2	once	0	Yes	yes	yes	yes	yes	no	no	yes	0
367	F	73	single	secondary	unemployed	less activity	1,000－9,999元	Urban medical insurance	<30	yes	≥10	no	158cm	57kg	no	yes	yes	no	yes	no	yes	no	1－2	once	0	Yes	yes	no	no	no	yes	no	no	0.75
368	F	61	married	primary	unemployed	less activity	＜1,000元	Rural cooperative medical care	<30	yes	1_5	no	168cm	74kg	no	no	no	unclear	yes	no	no	no	1－2	once	0	Yes	yes	yes	yes	yes	no	yes	yes	0.25
369	F	72	married	secondary	unemployed	less activity	1,000－9,999元	Urban medical insurance	<30	yes	≥10	yes	160cm	60kg	no	no	no	unclear	yes	no	no	no	1－2	thrice	0	Yes	yes	yes	no	no	yes	no	no	1
370	M	70	married	secondary	unemployed	less activity	1,000－9,999元	Urban medical insurance	<30	yes	≥10	no	167cm	70kg	no	yes	no	yes	yes	no	yes	no	1－2	thrice	0	Yes	yes	no	no	no	yes	no	no	0.75
371	F	50	married	secondary	unemployed	less activity	1,000－9,999元	Urban medical insurance	<30	yes	5-10	no	160cm	55kg	no	yes	no	yes	no	no	no	no	1－2	thrice	1	Yes	yes	no	no	yes	yes	yes	no	0.75
372	M	60	married	secondary	unemployed	less activity	1,000－9,999元	Urban medical insurance	<30	yes	≥10	no	176cm	75kg	no	yes	no	no	yes	no	no	no	1－2	once	1	Yes	yes	no	no	no	yes	no	no	1
373	F	71	married	secondary	unemployed	less activity	1,000－9,999元	Urban medical insurance	≥30	yes	≥10	yes	160cm	69kg	yes	yes	yes	no	yes	no	yes	no	3	thrice	0	Yes	yes	no	no	no	yes	no	no	0.75
374	M	37	married	higher	employed	light-to-moderate activity	1,000－9,999元	Urban medical insurance	<30	yes	≥10	yes	176cm	70kg	no	yes	no	yes	no	yes	no	yes	3	twice	1	Yes	yes	yes	no	yes	yes	no	no	0.5
375	M	50	married	primary	unemployed	light-to-moderate activity	1,000－9,999元	Rural cooperative medical care	≥30	yes	1_5	no	170cm	58kg	no	yes	no	yes	yes	no	no	unclear	1－2	twice	2	Yes	yes	yes	yes	yes	yes	yes	yes	0.75
376	M	47	married	secondary	employed	light-to-moderate activity	1,000－9,999元	Urban medical insurance	<30	yes	1_5	no	180cm	70kg	no	no	no	yes	yes	no	no	no	1－2	thrice	0	Yes	yes	no	no	yes	yes	no	no	0.75
377	M	40	married	secondary	employed	light-to-moderate activity	1,000－9,999元	Urban medical insurance	<30	no	5-10	no	170cm	93kg	yes	yes	no	unclear	yes	yes	yes	no	3	thrice	2	no	no	no	no	no	yes	no	no	1
378	F	63	married	secondary	employed	light-to-moderate activity	1,000－9,999元	Rural cooperative medical care	<30	no	≥10	yes	160cm	59kg	no	yes	no	no	yes	yes	no	unclear	1－2	once	0	Yes	no	no	no	yes	yes	no	no	0.75
379	M	44	married	secondary	employed	less activity	1,000－9,999元	Urban medical insurance	<30	yes	<1	yes	178cm	105kg	no	no	no	no	no	yes	yes	no	3	thrice	0	Yes	no	no	no	no	yes	no	no	1
380	F	69	married	primary	unemployed	less activity	1,000－9,999元	Urban medical insurance	<30	yes	≥10	no	150cm	50kg	unclear	yes	yes	yes	yes	yes	yes	unclear	4－5	thrice	1	Yes	yes	no	no	no	yes	no	no	1
381	F	59	married	primary	unemployed	less activity	1,000－9,999元	Urban medical insurance	<30	yes	≥10	yes	153cm	66.7kg	yes	yes	yes	unclear	yes	yes	yes	yes	≥6	thrice	2	yes	yes	no	no	no	yes	no	no	0.75
382	F	66	married	primary	unemployed	less activity	＜1,000元	Rural cooperative medical care	<30	yes	5-10	no	156cm	60kg	no	unclear	no	unclear	no	unclear	yes	unclear	1－2	once	2	Yes	no	no	no	no	yes	no	no	1
383	M	60	married	secondary	unemployed	light-to-moderate activity	10,000-19,999元	Urban medical insurance	<30	yes	≥10	yes	178cm	90kg	yes	unclear	unclear	unclear	no	yes	yes	unclear	4－5	once	2	Yes	yes	no	no	yes	yes	no	no	0.75
384	M	67	married	secondary	unemployed	less activity	1,000－9,999元	Urban medical insurance	<30	yes	≥10	yes	169cm	68kg	yes	unclear	yes	no	no	yes	yes	yes	3	thrice	0	Yes	yes	yes	no	yes	yes	no	no	0.75
385	M	65	married	secondary	unemployed	light-to-moderate activity	1,000－9,999元	Urban medical insurance	<30	no	5-10	no	165cm	80kg	no	no	no	no	no	yes	no	yes	1－2	twice	1	Yes	yes	yes	yes	yes	yes	no	no	0.75
386	M	27	married	primary	employed	heavy activity	1,000－9,999元	Rural cooperative medical care	<30	yes	<1	yes	172cm	56kg	no	unclear	unclear	unclear	no	unclear	no	unclear	1－2	once	0	Yes	no	no	no	no	no	no	yes	1
387	F	74	married	primary	unemployed	less activity	＜1,000元	Rural cooperative medical care	<30	no	5-10	no	160cm	65kg	yes	unclear	unclear	unclear	yes	unclear	no	no	1－2	once	2	Yes	yes	yes	yes	yes	yes	no	no	0
388	F	35	married	primary	unemployed	light-to-moderate activity	1,000－9,999元	Rural cooperative medical care	<30	no	<1	no	163cm	80kg	no	no	no	yes	no	no	no	no	1－2	thrice	0	Yes	no	no	no	no	yes	yes	yes	1
389	F	57	married	primary	unemployed	less activity	1,000－9,999元	Urban medical insurance	<30	yes	≥10	no	156cm	62kg	no	yes	unclear	unclear	no	unclear	no	unclear	1－2	once	0	yes	yes	no	yes	no	yes	no	no	0.75
390	M	74	single	secondary	unemployed	less activity	1,000－9,999元	Urban medical insurance	<30	yes	≥10	no	173cm	73.5kg	no	no	yes	unclear	yes	yes	yes	unclear	≥6	twice	1	Yes	yes	no	no	no	yes	no	no	1
391	F	72	married	secondary	unemployed	less activity	1,000－9,999元	Urban medical insurance	≥30	yes	≥10	no	150cm	68.5kg	yes	yes	yes	no	yes	yes	yes	yes	≥6	quartic	0	Yes	yes	no	no	no	yes	no	no	1
392	F	57	married	primary	unemployed	less activity	＜1,000元	Rural cooperative medical care	≥30	yes	≥10	yes	165cm	65kg	yes	yes	yes	no	no	no	no	no	≥6	thrice	2	Yes	no	no	no	yes	no	no	no	1
393	F	62	married	primary	unemployed	less activity	＜1,000元	Rural cooperative medical care	<30	yes	5-10	no	159cm	60kg	yes	no	no	yes	yes	no	yes	no	≥6	twice	2	Yes	yes	no	no	yes	yes	no	yes	0.75
394	M	52	single	secondary	unemployed	less activity	1,000－9,999元	Urban medical insurance	<30	yes	≥10	no	180cm	85kg	no	yes	yes	no	yes	yes	no	no	3	thrice	1	Yes	yes	no	no	yes	yes	no	no	1
395	F	60	married	primary	unemployed	less activity	1,000－9,999元	Urban medical insurance	<30	yes	≥10	yes	162cm	79.5kg	no	no	yes	no	yes	yes	yes	no	4-5	thrice	0	Yes	no	no	no	no	yes	no	no	1
396	F	60	married	secondary	unemployed	less activity	1,000－9,999元	Urban medical insurance	<30	yes	1_5	no	174cm	85kg	yes	yes	no	no	yes	no	yes	no	≥6	quartic	0	Yes	yes	no	yes	yes	yes	yes	no	0.5
397	M	62	married	secondary	unemployed	less activity	1,000－9,999元	Urban medical insurance	<30	yes	1_5	no	170cm	60kg	no	yes	no	no	no	no	no	no	1－2	thrice	1	Yes	yes	no	no	yes	yes	no	no	0.75
398	F	67	married	secondary	unemployed	less activity	1,000－9,999元	Urban medical insurance	<30	yes	5-10	yes	167cm	80kg	yes	yes	yes	no	yes	no	yes	no	≥6	twice	1	Yes	yes	no	no	yes	yes	no	no	0.75
399	F	71	married	secondary	unemployed	less activity	1,000－9,999元	Urban medical insurance	<30	yes	5-10	no	155cm	62kg	yes	yes	no	yes	no	no	yes	unclear	3	thrice	2	Yes	yes	no	no	yes	yes	no	no	0.75
400	M	57	married	primary	unemployed	less activity	1,000－9,999元	self-funded	<30	yes	5-10	no	175cm	65kg	no	yes	no	yes	yes	no	no	unclear	1－2	thrice	0	Yes	no	no	no	yes	yes	no	no	0.75
401	F	60	married	secondary	unemployed	less activity	1,000－9,999元	Urban medical insurance	<30	yes	≥10	no	160cm	50kg	yes	yes	yes	no	yes	no	yes	unclear	≥6	thrice	2	Yes	no	no	no	no	yes	no	no	1
402	M	47	married	secondary	employed	light-to-moderate activity	1,000－9,999元	Urban medical insurance	<30	yes	≥10	no	184cm	81kg	no	yes	yes	yes	no	yes	no	no	1－2	thrice	0	Yes	yes	no	yes	yes	yes	no	no	0.75
403	M	63	married	secondary	unemployed	less activity	1,000－9,999元	Urban medical insurance	<30	yes	≥10	no	178cm	82kg	no	yes	no	no	yes	yes	yes	unclear	3	twice	1	Yes	yes	no	no	no	yes	no	no	0.5
404	F	74	married	primary	unemployed	less activity	＜1,000元	Rural cooperative medical care	<30	yes	≥10	no	165cm	70kg	no	yes	yes	yes	yes	no	yes	yes	≥6	thrice	0	Yes	yes	no	no	yes	yes	no	no	1
405	M	53	married	secondary	employed	light-to-moderate activity	1,000－9,999元	Urban medical insurance	<30	yes	5-10	yes	165cn	70kg	no	yes	no	no	yes	no	yes	no	≥6	twice	2	no	yes	no	yes	yes	yes	no	no	0.75
406	M	76	married	primary	unemployed	light-to-moderate activity	1,000－9,999元	Urban medical insurance	<30	yes	≥10	yes	160cm	70kg	no	yes	no	no	yes	no	yes	unclear	≥6	thrice	1	Yes	yes	yes	no	yes	yes	no	no	0.75
407	F	57	married	secondary	unemployed	less activity	1,000－9,999元	Urban medical insurance	<30	no	<1	no	162cm	60kg	no	yes	no	no	no	yes	yes	no	≥6	thrice	0	Yes	no	no	no	no	yes	no	yes	1
408	M	36	married	secondary	employed	heavy activity	1,000－9,999元	Urban medical insurance	<30	yes	5-10	yes	172cm	80kg	yes	yes	yes	no	yes	no	no	yes	3	thrice	2	Yes	no	no	no	no	yes	no	no	1
409	F	69	married	secondary	unemployed	less activity	1,000－9,999元	Urban medical insurance	<30	yes	≥10	no	162cm	73kg	no	yes	yes	no	no	no	yes	no	≥6	thrice	2	Yes	yes	no	yes	yes	yes	no	no	0.75
410	M	56	married	secondary	employed	light-to-moderate activity	1,000－9,999元	Urban medical insurance	<30	yes	5-10	no	165cm	70kg	yes	yes	no	no	yes	yes	yes	no	≥6	thrice	2	Yes	yes	no	no	no	no	no	no	0.5
411	F	75	married	secondary	unemployed	less activity	1,000－9,999元	Urban medical insurance	<30	yes	≥10	yes	159cm	60kg	no	yes	yes	no	no	yes	yes	no	≥6	thrice	≥3	no	yes	no	no	no	yes	no	no	0.75
412	M	49	married	secondary	employed	light-to-moderate activity	1,000－9,999元	Urban medical insurance	≥30	no	5-10	no	168cm	68kg	no	yes	no	no	no	no	no	yes	3	thrice	≥3	no	yes	yes	no	no	yes	no	no	0.5
413	M	62	married	primary	unemployed	less activity	1,000－9,999元	Urban medical insurance	<30	yes	5-10	yes	170cm	75kg	no	yes	no	no	yes	no	yes	no	≥6	once	2	no	yes	no	no	yes	yes	no	no	0.5
414	F	58	married	primary	unemployed	light-to-moderate activity	1,000－9,999元	Rural cooperative medical care	<30	yes	<1	no	160cm	53.5kg	no	unclear	no	no	no	no	no	no	1－2	once	0	Yes	no	yes	yes	no	no	no	no	1
415	M	73	single	primary	unemployed	light-to-moderate activity	1,000－9,999元	Rural cooperative medical care	<30	yes	≥10	no	176cm	88.5kg	yes	yes	no	no	yes	no	yes	no	1－2	once	0	Yes	yes	no	no	yes	yes	no	no	0.75
416	M	60	married	secondary	unemployed	less activity	＜1,000元	Rural cooperative medical care	<30	yes	≥10	yes	173cm	78kg	no	no	no	no	no	no	yes	no	1－2	thrice	1	Yes	yes	no	yes	yes	yes	no	no	0.75
417	M	37	single	secondary	employed	heavy activity	1,000－9,999元	Rural cooperative medical care	<30	yes	≥10	yes	170cm	61kg	no	yes	yes	yes	yes	yes	no	no	1－2	thrice	0	Yes	no	no	no	yes	yes	no	yes	0.75
418	M	51	married	secondary	employed	less activity	1,000－9,999元	Urban medical insurance	<30	yes	1_5	no	176cm	65kg	no	yes	no	yes	no	no	no	unclear	1－2	thrice	1	Yes	yes	yes	yes	yes	yes	no	no	0.5
419	M	57	married	secondary	employed	less activity	1,000－9,999元	Urban medical insurance	<30	yes	1_5	no	170cm	75kg	no	yes	no	no	no	yes	no	no	3	thrice	≥3	no	yes	no	no	no	yes	no	no	0.75
420	M	46	married	secondary	employed	light-to-moderate activity	1,000－9,999元	Urban medical insurance	<30	yes	<1	yes	170cm	75kg	no	no	no	no	no	no	yes	no	1－2	thrice	0	Yes	yes	no	yes	no	yes	no	no	0.75
421	F	72	married	primary	unemployed	less activity	1,000－9,999元	Urban medical insurance	<30	yes	1_5	no	162cm	50kg	no	yes	no	no	no	yes	yes	no	1－2	thrice	0	Yes	no	no	no	no	yes	no	no	1
422	M	61	married	primary	unemployed	less activity	1,000－9,999元	Urban medical insurance	<30	yes	5-10	no	179cm	74kg	no	yes	yes	no	yes	no	no	no	1－2	thrice	1	Yes	yes	no	no	yes	yes	no	no	0.75
423	F	46	married	primary	unemployed	light-to-moderate activity	1,000－9,999元	Rural cooperative medical care	<30	yes	1_5	no	150cm	60kg	no	no	no	no	no	no	no	no	1－2	thrice	2	Yes	yes	yes	no	yes	yes	no	no	0.5
424	F	67	single	secondary	unemployed	less activity	1,000－9,999元	Urban medical insurance	<30	yes	<1	yes	160cm	66kg	no	yes	no	no	no	yes	yes	no	1－2	thrice	0	Yes	yes	yes	yes	yes	yes	yes	yes	0
425	M	52	married	secondary	employed	light-to-moderate activity	1,000－9,999元	Urban medical insurance	<30	yes	1_5	no	170cm	81kg	no	yes	yes	no	yes	yes	no	no	1－2	thrice	1	Yes	yes	no	no	yes	yes	no	no	0.75
426	F	46	married	primary	unemployed	light-to-moderate activity	1,000－9,999元	Rural cooperative medical care	<30	yes	5-10	no	150cm	58kg	no	yes	yes	no	no	yes	no	yes	4-5	thrice	2	Yes	no	no	no	no	yes	no	no	0.75
427	M	59	married	secondary	employed	light-to-moderate activity	1,000－9,999元	Urban medical insurance	<30	yes	≥10	no	168cm	74kg	no	yes	yes	yes	yes	no	yes	no	≥6	thrice	≥3	no	yes	no	no	no	yes	no	no	1
428	F	72	married	secondary	unemployed	less activity	1,000－9,999元	Urban medical insurance	<30	yes	<1	no	161cm	62.5kg	yes	yes	no	unclear	yes	yes	yes	unclear	4－5	twice	0	Yes	no	no	no	no	yes	yes	yes	1
429	F	51	single	primary	unemployed	less activity	＜1,000元	Rural cooperative medical care	<30	yes	<1	no	156cm	70kg	no	yes	no	no	yes	yes	no	unclear	1－2	twice	0	Yes	yes	yes	no	no	yes	no	no	0.5
430	F	49	married	secondary	unemployed	less activity	1,000－9,999元	Urban medical insurance	<30	yes	1_5	no	170cm	71kg	no	yes	no	unclear	yes	no	no	unclear	1－2	thrice	1	Yes	yes	no	no	no	yes	no	no	0.75
431	M	56	married	secondary	employed	less activity	1,000－9,999元	Urban medical insurance	<30	yes	≥10	yes	170cm	60kg	no	yes	no	unclear	no	yes	yes	unclear	3	once	2	Yes	yes	yes	no	yes	yes	no	no	0.5
432	M	67	married	secondary	unemployed	less activity	1,000－9,999元	Urban medical insurance	<30	yes	≥10	no	171cm	95kg	no	yes	yes	no	yes	yes	no	no	3	once	≥3	no	yes	yes	no	no	yes	no	no	0.25
433	F	65	married	primary	unemployed	less activity	1,000－9,999元	Rural cooperative medical care	<30	yes	1_5	yes	163cm	70kg	no	unclear	yes	unclear	yes	no	yes	unclear	3	twice	2	Yes	no	no	no	no	yes	no	no	1
434	M	57	married	secondary	employed	light-to-moderate activity	1,000－9,999元	Urban medical insurance	<30	yes	5-10	no	170cm	80kg	no	yes	no	unclear	no	yes	no	no	1－2	once	1	Yes	yes	no	no	no	yes	no	no	0.75
435	M	59	married	secondary	employed	less activity	1,000－9,999元	Urban medical insurance	<30	yes	1_5	yes	169cm	82kg	no	yes	unclear	unclear	no	yes	no	no	1－2	thrice	2	Yes	yes	no	yes	yes	yes	yes	no	0.25
436	M	61	married	secondary	unemployed	less activity	1,000－9,999元	Urban medical insurance	<30	yes	≥10	no	173cm	78.5kg	no	yes	unclear	unclear	yes	no	yes	unclear	≥6	quartic	0	Yes	yes	no	no	yes	yes	no	no	0.75
437	F	62	married	secondary	unemployed	less activity	1,000－9,999元	Urban medical insurance	<30	yes	5-10	no	156cm	67kg	no	no	no	unclear	yes	no	yes	no	3	once	≥3	no	no	no	no	yes	no	no	no	1
438	M	66	single	secondary	unemployed	less activity	1,000－9,999元	Urban medical insurance	<30	yes	≥10	yes	176cm	79kg	yes	yes	unclear	unclear	yes	no	yes	yes	4-5	thrice	0	Yes	yes	yes	yes	yes	yes	no	yes	0.5
439	M	56	married	secondary	employed	less activity	1,000－9,999元	Urban medical insurance	<30	yes	1_5	no	176cm	88kg	no	yes	no	yes	yes	yes	no	unclear	1－2	twice	2	Yes	yes	no	yes	yes	yes	no	no	0.5
440	M	36	married	primary	unemployed	less activity	1,000－9,999元	Urban medical insurance	<30	yes	1_5	no	168cm	60kg	no	no	no	unclear	no	no	no	unclear	1－2	thrice	1	Yes	yes	yes	no	yes	yes	no	no	0.25
441	F	61	married	secondary	unemployed	less activity	1,000－9,999元	Urban medical insurance	<30	yes	5-10	no	162cm	65kg	no	yes	no	no	yes	yes	no	no	3	thrice	1	Yes	yes	no	no	no	yes	no	no	0.75
442	F	57	married	secondary	unemployed	less activity	1,000－9,999元	Urban medical insurance	<30	yes	5-10	no	159cm	61kg	no	yes	unclear	no	yes	yes	yes	yes	1－2	thrice	0	yes	no	no	no	no	yes	no	no	1
443	M	30	married	secondary	employed	heavy activity	1,000－9,999元	Rural cooperative medical care	<30	yes	5-10	no	178cm	62kg	no	no	no	unclear	no	no	no	no	1－2	once	0	Yes	yes	no	no	yes	yes	no	no	0.75
444	F	60	married	primary	employed	less activity	1,000－9,999元	Urban medical insurance	<30	yes	1_5	yes	163cm	100kg	no	no	no	unclear	yes	unclear	yes	yes	1－2	thrice	1	Yes	no	no	no	no	yes	no	no	1
445	M	49	married	secondary	employed	light-to-moderate activity	1,000－9,999元	Urban medical insurance	<30	no	≥10	no	175cm	75kg	no	yes	no	no	yes	yes	yes	no	4－5	twice	2	Yes	yes	no	no	yes	yes	no	no	0.25
446	F	70	married	secondary	unemployed	less activity	1,000－9,999元	Urban medical insurance	<30	no	≥10	yes	150cm	65kg	no	yes	yes	unclear	yes	no	yes	unclear	1－2	thrice	2	Yes	yes	no	no	yes	yes	no	no	1
447	M	56	married	higher	employed	less activity	10,000-19,999元	Urban medical insurance	<30	yes	≥10	no	176cm	84kg	yes	yes	yes	yes	yes	yes	yes	yes	≥6	thrice	2	Yes	yes	no	no	no	yes	no	yes	0.75
448	M	70	married	primary	unemployed	less activity	1,000－9,999元	Urban medical insurance	<30	yes	≥10	no	164cm	60kg	no	yes	no	yes	no	yes	no	yes	1－2	twice	1	Yes	yes	no	no	yes	yes	no	no	0.75
449	M	32	married	secondary	employed	heavy activity	1,000－9,999元	Urban medical insurance	<30	yes	1_5	no	171cm	60kg	no	no	no	no	no	no	no	no	1－2	thrice	0	Yes	yes	yes	no	yes	yes	no	yes	0.25
450	F	60	married	primary	unemployed	less activity	＜1,000元	Rural cooperative medical care	<30	yes	1_5	no	170cm	85kg	yes	yes	unclear	unclear	yes	no	yes	no	≥6	twice	2	Yes	yes	no	no	no	yes	no	yes	0.75
451	F	39	married	secondary	employed	light-to-moderate activity	1,000－9,999元	Urban medical insurance	<30	yes	1_5	no	160cm	45kg	no	no	no	no	yes	no	no	yes	1－2	once	0	Yes	no	no	no	no	yes	no	yes	1
452	M	46	married	primary	employed	less activity	1,000－9,999元	Urban medical insurance	<30	yes	5-10	yes	174cm	78kg	yes	unclear	no	no	yes	yes	yes	unclear	1－2	thrice	1	Yes	yes	yes	no	yes	yes	no	no	0.5
453	F	52	married	secondary	unemployed	less activity	1,000－9,999元	Urban medical insurance	<30	yes	1_5	yes	170cm	85kg	no	no	no	no	yes	no	yes	no	3	thrice	1	Yes	no	no	no	no	yes	no	no	1
454	F	55	married	secondary	unemployed	less activity	1,000－9,999元	Urban medical insurance	<30	yes	5-10	no	160cm	75kg	no	unclear	unclear	no	no	no	no	unclear	1－2	thrice	2	no	no	no	no	no	yes	no	no	1
455	F	55	married	primary	unemployed	less activity	＜1,000元	self-funded	<30	yes	5-10	no	168cm	68kg	no	unclear	yes	unclear	yes	yes	yes	unclear	4－5	once	2	Yes	yes	yes	no	yes	yes	no	no	0.75
456	F	71	married	primary	unemployed	less activity	1,000－9,999元	Urban medical insurance	<30	yes	≥10	yes	168cm	69kg	yes	yes	yes	unclear	yes	no	no	unclear	≥6	twice	1	Yes	yes	no	no	no	yes	no	no	0.75
457	F	51	married	primary	employed	less activity	1,000－9,999元	Urban medical insurance	<30	yes	5-10	no	160cm	78kg	no	unclear	no	unclear	no	unclear	no	unclear	1－2	thrice	1	Yes	no	no	no	no	yes	no	no	1
458	M	33	married	higher	unemployed	light-to-moderate activity	1,000－9,999元	Rural cooperative medical care	<30	yes	1_5	yes	175cm	78kg	no	no	no	no	no	no	no	unclear	1－2	thrice	2	Yes	yes	no	no	no	yes	no	no	0.5
459	F	67	married	primary	unemployed	less activity	1,000－9,999元	Rural cooperative medical care	<30	yes	≥10	yes	165cm	75kg	no	yes	no	unclear	no	no	no	no	1－2	twice	2	Yes	yes	no	no	no	yes	no	no	0.75
460	M	32	married	higher	employed	light-to-moderate activity	1,000－9,999元	Urban medical insurance	<30	yes	5-10	yes	165cm	75kg	no	no	no	no	yes	yes	no	yes	1－2	thrice	2	Yes	yes	yes	yes	yes	yes	yes	yes	0.25
461	F	51	married	secondary	employed	less activity	＜1,000元	Rural cooperative medical care	<30	yes	≥10	yes	160cm	60kg	no	no	no	unclear	yes	no	no	no	1－2	thrice	0	Yes	no	no	no	no	yes	no	no	1
462	F	56	married	primary	unemployed	heavy activity	1,000－9,999元	self-funded	<30	yes	≥10	no	160cm	65kg	no	yes	yes	no	yes	yes	yes	unclear	1－2	once	0	Yes	no	no	no	no	yes	no	no	1
463	F	70	married	primary	unemployed	less activity	＜1,000元	Rural cooperative medical care	<30	yes	≥10	no	160cm	60kg	no	yes	unclear	no	yes	no	yes	no	1－2	thrice	0	Yes	no	no	no	yes	yes	no	no	1
464	M	51	married	secondary	employed	light-to-moderate activity	1,000－9,999元	Urban medical insurance	<30	yes	5-10	no	179cm	100kg	no	yes	yes	no	yes	no	yes	yes	3	thrice	1	Yes	yes	no	no	no	yes	no	no	0.75
465	F	66	married	primary	unemployed	less activity	＜1,000元	Rural cooperative medical care	<30	yes	≥10	no	160cm	75kg	no	yes	no	unclear	yes	yes	yes	no	3	once	2	Yes	yes	no	no	no	yes	no	no	0.5
466	M	53	married	primary	unemployed	less activity	1,000－9,999元	Urban medical insurance	<30	yes	≥10	yes	180cm	80kg	no	yes	no	no	yes	no	no	no	1－2	once	2	Yes	yes	yes	yes	no	yes	yes	no	0.5
467	F	57	married	secondary	unemployed	light-to-moderate activity	1,000－9,999元	Urban medical insurance	<30	yes	≥10	no	158cm	70kg	no	unclear	unclear	unclear	yes	yes	yes	unclear	1－2	thrice	1	Yes	no	yes	no	yes	yes	no	yes	0.25
468	M	63	married	secondary	unemployed	light-to-moderate activity	1,000－9,999元	Urban medical insurance	≥30	yes	≥10	no	177cm	70kg	no	yes	yes	yes	yes	no	unclear	yes	1－2	once	1	Yes	yes	yes	no	no	yes	yes	yes	0.5
469	F	52	married	secondary	unemployed	less activity	1,000－9,999元	Urban medical insurance	<30	yes	5-10	yes	163cm	75kg	yes	no	unclear	unclear	no	yes	yes	no	1－2	twice	1	Yes	no	no	no	no	yes	no	no	0.75
470	F	73	single	primary	unemployed	less activity	＜1,000元	Urban medical insurance	<30	yes	≥10	no	162cm	75kg	no	yes	unclear	unclear	yes	yes	yes	unclear	3	once	2	Yes	no	no	no	no	yes	no	yes	1
471	M	62	married	primary	unemployed	less activity	1,000－9,999元	Urban medical insurance	<30	yes	≥10	no	170cm	65kg	no	no	yes	yes	yes	no	no	no	1－2	thrice	0	Yes	yes	no	no	no	yes	no	no	0.75
472	M	60	married	secondary	unemployed	less activity	1,000－9,999元	Urban medical insurance	<30	yes	≥10	yes	164cm	74kg	no	no	no	unclear	yes	no	no	no	1－2	twice	1	Yes	yes	no	no	no	yes	no	no	0.75
473	F	60	married	primary	unemployed	less activity	1,000－9,999元	Urban medical insurance	<30	yes	1_5	yes	153cm	70	no	no	no	unclear	no	yes	yes	unclear	1－2	once	1	Yes	no	no	no	no	yes	no	yes	1
474	M	55	married	secondary	employed	light-to-moderate activity	1,000－9,999元	Urban medical insurance	<30	yes	5-10	yes	173cm	70kg	no	yes	yes	no	yes	yes	yes	unclear	3	quartic	1	Yes	yes	no	no	yes	yes	no	no	0.75
475	M	58	married	secondary	unemployed	less activity	1,000－9,999元	Urban medical insurance	<30	yes	5-10	yes	175cm	72.5kg	no	yes	yes	no	yes	yes	yes	unclear	4-5	quartic	1	Yes	no	no	no	no	yes	no	no	0.75
476	M	53	married	secondary	employed	light-to-moderate activity	1,000－9,999元	Urban medical insurance	<30	yes	5-10	no	173cm	78kg	no	yes	no	unclear	yes	yes	no	yes	1－2	twice	2	Yes	no	no	no	no	yes	no	no	1
477	M	73	married	secondary	unemployed	less activity	＜1,000元	Rural cooperative medical care	<30	yes	≥10	no	172cm	80kg	no	no	yes	no	unclear	yes	no	unclear	1－2	once	1	Yes	yes	yes	no	no	yes	no	no	0.5
478	F	54	married	secondary	employed	less activity	1,000－9,999元	Urban medical insurance	<30	yes	≥10	yes	176cm	80kg	no	yes	yes	unclear	yes	no	no	unclear	1－2	once	0	Yes	yes	no	yes	no	yes	no	no	0.75
479	F	58	married	secondary	unemployed	less activity	1,000－9,999元	Urban medical insurance	<30	yes	5-10	yes	163cm	69kg	yes	yes	no	no	yes	no	no	no	1－2	quartic	2	no	yes	no	yes	yes	yes	yes	no	0.75
480	F	75	single	secondary	unemployed	less activity	1,000－9,999元	Urban medical insurance	<30	yes	5-10	no	170cm	62kg	no	yes	no	yes	no	no	yes	no	1－2	twice	1	Yes	no	no	no	no	yes	no	no	1
481	M	30	single	secondary	employed	heavy activity	1,000－9,999元	Rural cooperative medical care	<30	yes	<1	no	170cm	62kg	no	unclear	unclear	no	no	no	no	unclear	1－2	thrice	0	Yes	no	no	no	no	yes	no	no	1
482	F	64	married	secondary	unemployed	less activity	1,000－9,999元	Urban medical insurance	<30	yes	≥10	yes	152cm	54kg	no	yes	no	no	yes	yes	yes	no	4－5	quartic	≥3	no	yes	no	no	yes	yes	no	no	0.75
483	F	79	single	secondary	unemployed	less activity	1,000－9,999元	Urban medical insurance	<30	no	5-10	no	150cm	65kg	yes	yes	yes	unclear	yes	yes	yes	unclear	3	quartic	2	Yes	yes	no	no	no	no	no	no	0.75
484	M	52	married	secondary	employed	less activity	1,000－9,999元	Urban medical insurance	<30	yes	≥10	no	174cm	90lg	no	yes	yes	unclear	yes	yes	yes	no	1－2	once	1	Yes	yes	no	no	yes	no	no	no	1
485	F	63	married	primary	unemployed	less activity	1,000－9,999元	Urban medical insurance	<30	yes	≥10	no	163cm	57kg	no	yes	yes	unclear	no	yes	yes	no	4－5	quartic	≥3	no	no	no	no	no	yes	no	no	1
486	F	64	married	primary	unemployed	less activity	1,000－9,999元	Urban medical insurance	<30	yes	5-10	yes	163cm	70kg	unclear	yes	yes	unclear	yes	no	yes	no	4－5	quartic	2	Yes	no	no	no	yes	yes	no	yes	0.75
487	F	51	married	secondary	unemployed	less activity	1,000－9,999元	Urban medical insurance	<30	no	<1	no	156cm	66kg	no	no	no	no	no	no	no	no	1－2	twice	0	Yes	no	no	no	yes	yes	no	no	1
488	F	55	married	secondary	employed	less activity	1,000－9,999元	Urban medical insurance	<30	yes	1_5	yes	175cm	73kg	unclear	yes	yes	no	no	no	no	no	1－2	twice	1	Yes	yes	no	no	yes	yes	no	no	0.75
489	M	56	married	secondary	employed	less activity	1,000－9,999元	Urban medical insurance	<30	yes	1_5	no	169cm	82kg	no	yes	no	no	yes	no	yes	no	3	quartic	1	Yes	yes	yes	no	yes	yes	no	no	0.5
490	M	47	married	secondary	employed	less activity	1,000－9,999元	Urban medical insurance	<30	yes	5-10	no	170cm	60kg	no	yes	no	no	no	no	no	no	1－2	once	1	Yes	yes	no	yes	yes	yes	no	no	0.75
491	M	39	married	secondary	employed	less activity	1,000－9,999元	Urban medical insurance	<30	yes	≥10	yes	170cm	70kg	no	no	yes	no	yes	no	no	no	1－2	once	0	yes	no	no	no	yes	yes	no	no	1
492	M	70	married	primary	employed	less activity	＜1,000元	Rural cooperative medical care	<30	yes	1_5	yes	178cm	95kg	no	yes	no	no	yes	yes	unclear	unclear	1－2	quartic	1	Yes	yes	no	no	yes	yes	no	no	0.5
493	F	69	married	primary	unemployed	less activity	＜1,000元	Rural cooperative medical care	<30	yes	≥10	no	156cm	74kg	no	no	no	no	yes	no	yes	yes	4－5	twice	≥3	no	no	no	no	yes	yes	no	no	0.75
494	F	62	married	secondary	unemployed	less activity	1,000－9,999元	Urban medical insurance	<30	yes	≥10	no	165cm	63kg	no	yes	no	unclear	yes	no	yes	yes	≥6	quartic	≥3	no	yes	no	no	yes	no	no	no	1
495	F	71	married	secondary	unemployed	less activity	1,000－9,999元	Urban medical insurance	<30	yes	≥10	no	158cm	60kg	no	yes	no	no	yes	no	yes	unclear	≥6	quartic	≥3	no	yes	no	no	yes	yes	no	no	0.75
496	F	59	single	secondary	unemployed	less activity	1,000－9,999元	Urban medical insurance	<30	yes	≥10	no	163cm	79kg	yes	yes	yes	no	yes	yes	yes	no	3	quartic	1	Yes	yes	no	no	no	yes	no	no	0.75
497	F	65	married	primary	unemployed	less activity	＜1,000元	Rural cooperative medical care	<30	yes	≥10	no	158cm	45kg	no	yes	no	no	yes	yes	no	unclear	1－2	thrice	0	Yes	yes	no	no	yes	yes	no	no	1
498	M	44	married	primary	unemployed	light-to-moderate activity	1,000－9,999元	Rural cooperative medical care	<30	yes	1_5	no	176cm	66.5kg	no	yes	unclear	no	yes	yes	no	yes	1－2	once	0	Yes	no	no	no	no	yes	no	no	1
499	M	57	married	secondary	unemployed	less activity	1,000－9,999元	Urban medical insurance	<30	yes	≥10	no	180cm	73kg	no	yes	yes	no	yes	no	no	no	1－2	quartic	2	Yes	yes	no	no	no	yes	no	no	0.75
500	F	62	married	secondary	unemployed	less activity	1,000－9,999元	Urban medical insurance	<30	yes	≥10	yes	168cm	78kg	no	yes	yes	no	yes	yes	yes	yes	3	quartic	2	Yes	yes	no	no	yes	yes	no	no	0.75
501	M	59	single	secondary	unemployed	less activity	1,000－9,999元	Urban medical insurance	<30	yes	5-10	no	163cm	60kg	no	yes	no	yes	yes	no	no	unclear	1－2	quartic	1	Yes	yes	no	no	yes	yes	no	no	0.5
502	M	52	married	secondary	employed	less activity	1,000－9,999元	Urban medical insurance	<30	yes	≥10	yes	170cn	78kg	no	yes	yes	unclear	yes	yes	yes	yes	3	quartic	1	Yes	no	no	no	no	yes	no	no	0.75
503	M	52	married	primary	unemployed	light-to-moderate activity	＜1,000元	Rural cooperative medical care	≥30	yes	5-10	no	175cm	65kg	no	yes	yes	unclear	yes	yes	yes	unclear	4－5	quartic	≥3	no	yes	no	yes	no	no	no	yes	0.75
504	F	63	married	secondary	unemployed	less activity	1,000－9,999元	Urban medical insurance	<30	yes	≥10	yes	160cm	55kg	no	yes	yes	no	yes	no	no	no	1－2	quartic	2	Yes	no	no	no	no	yes	no	no	1
505	M	58	married	primary	employed	less activity	1,000－9,999元	Urban medical insurance	<30	yes	≥10	yes	177cm	73kg	no	no	no	no	yes	no	no	unclear	1－2	quartic	2	Yes	yes	no	no	yes	no	no	no	0.75
506	F	59	married	secondary	unemployed	less activity	1,000－9,999元	Urban medical insurance	<30	yes	≥10	no	165cm	65kg	no	yes	yes	unclear	yes	unclear	yes	unclear	1－2	quartic	2	Yes	no	no	no	no	yes	no	no	1
507	M	50	married	secondary	employed	less activity	1,000－9,999元	Urban medical insurance	<30	yes	≥10	no	180cm	95kg	no	yes	unclear	yes	yes	yes	yes	no	3	quartic	0	yes	yes	no	no	no	yes	no	no	0.75
508	M	62	married	secondary	unemployed	less activity	1,000－9,999元	Urban medical insurance	<30	yes	5-10	no	180cm	97kg	no	unclear	no	no	no	no	no	no	1－2	quartic	1	Yes	no	no	no	no	yes	no	no	1
509	F	44	married	primary	unemployed	less activity	＜1,000元	Rural cooperative medical care	<30	yes	≥10	no	160cm	70kg	no	yes	no	unclear	yes	yes	no	unclear	3	quartic	1	Yes	yes	yes	no	yes	yes	no	no	0.25
510	M	66	married	secondary	unemployed	less activity	1,000－9,999元	Urban medical insurance	<30	yes	≥10	no	174cm	80kg	yes	yes	no	no	yes	yes	no	no	3	quartic	≥3	no	yes	no	yes	yes	no	no	no	0.75
511	M	46	married	secondary	employed	less activity	1,000－9,999元	Urban medical insurance	<30	yes	5-10	yes	169cm	78kg	no	no	no	no	yes	no	no	no	3	quartic	≥3	no	yes	yes	no	yes	yes	no	no	0.75
512	M	51	married	secondary	employed	less activity	1,000－9,999元	Urban medical insurance	<30	yes	≥10	no	167cm	75kg	no	no	yes	yes	yes	yes	no	no	1－2	twice	1	Yes	yes	no	no	no	yes	no	no	0.75
513	F	69	married	secondary	unemployed	less activity	1,000－9,999元	Urban medical insurance	<30	yes	≥10	yes	150cm	70kg	no	yes	no	no	yes	no	no	unclear	3	thrice	0	Yes	yes	no	no	no	yes	no	no	0.75
514	M	53	married	secondary	employed	light-to-moderate activity	1,000－9,999元	Urban medical insurance	<30	no	1_5	no	167cm	84kg	no	yes	no	no	yes	yes	no	unclear	1－2	twice	1	Yes	yes	no	yes	yes	yes	yes	yes	0.25
515	M	48	married	secondary	unemployed	light-to-moderate activity	1,000－9,999元	Urban medical insurance	<30	yes	≥10	yes	170cm	94kg	no	yes	no	no	yes	yes	yes	no	1－2	quartic	1	Yes	no	no	no	no	yes	no	no	1
516	M	56	single	primary	employed	less activity	1,000－9,999元	Urban medical insurance	≥30	yes	1_5	no	170cm	84kg	no	no	no	no	yes	no	no	no	≥6	quartic	≥3	no	no	no	no	no	no	no	no	0.75
517	M	50	single	primary	employed	light-to-morderate activity	1,000－9,999元	Urban medical insurance	<30	yes	5－10	yes	172cm	75kg	no	yes	no	no	no	unclear	no	no	1－2	once	2	Yes	yes	no	no	no	no	no	no	1
518	M	47	married	primary	unemployed	light-to-morderate activity	1,000－9,999元	Rural cooperative medical care	<30	yes	1_5	no	170cm	80kg	no	no	no	no	no	no	yes	no	1－2	quartic	2	Yes	yes	yes	yes	no	yes	no	no	1
519	M	70	single	primary	unemployed	light-to-morderate activity	1,000－9,999元	Rural cooperative medical care	≥30	no	1_5	no	165cm	75kg	no	yes	unclear	unclear	yes	yes	no	unclear	1－2	quartic	2	no	yes	yes	yes	yes	yes	yes	no	0.25
520	F	48	married	primary	unemployed	less activity	＜1,000元	Rural cooperative medical care	<30	yes	1_5	yes	158cm	75kg	no	unclear	no	no	no	yes	no	no	1－2	once	0	Yes	no	no	no	no	no	no	no	1
521	F	78	married	primary	unemployed	less activity	＜1,000元	Rural cooperative medical care	≥30	yes	≥10	yes	160cm	85kg	yes	yes	no	yes	yes	yes	yes	unclear	4－5	quartic	2	yes	yes	no	no	no	no	no	no	1
522	M	56	married	primary	unemployed	light-to-morderate activity	1,000－9,999元	Rural cooperative medical care	<30	yes	1_5	yes	176cm	70kg	no	unclear	no	unclear	no	yes	yes	no	1－2	twice	0	yes	no	yes	no	no	no	yes	no	0.75
523	F	78	married	primary	unemployed	less activity	＜1,000元	Rural cooperative medical care	≥30	no	≥10	yes	16cm	85kg	yes	yes	no	yes	yes	yes	yes	no	4－5	quartic	2	Yes	yes	no	no	no	no	no	no	1
524	M	56	married	primary	unemployed	heavy activity	＜1,000元	Rural cooperative medical care	≥30	yes	<1	no	164cm	60kg	yes	yes	no	no	no	no	no	no	3	thrice	0	Yes	no	yes	no	yes	yes	no	yes	0.75
525	F	75	single	primary	unemployed	less activity	＜1,000元	Urban medical insurance	<30	yes	≥10	yes	163cm	60kg	unclear	no	yes	no	yes	yes	yes	unclear	4-5	twice	≥3	no	yes	no	no	no	no	no	no	0.75
526	F	51	married	primary	unemployed	less activity	1,000－9,999元	self-funded	≥30	yes	5－10	yes	160cm	54kg	no	unclear	unclear	unclear	yes	no	no	unclear	1－2	thrice	2	Yes	no	yes	yes	no	yes	yes	yes	0.25
527	M	48	married	secondary	employed	less activity	1,000－9,999元	Urban medical insurance	<30	yes	1_5	yes	175cm	80kg	no	no	no	no	no	no	no	no	1－2	once	1	Yes	no	no	no	no	no	no	no	0.75
528	F	45	single	secondary	employed	less activity	1,000－9,999元	Urban medical insurance	<30	no	<1	no	165cm	69kg	no	no	no	no	no	no	no	no	1－2	once	0	Yes	no	no	no	no	no	no	no	1
529	M	43	married	primary	employed	light-to-morderate activity	＜1,000元	Rural cooperative medical care	<30	yes	<1	no	176cm	71kg	unclear	unclear	unclear	unclear	no	yes	yes	unclear	1－2	once	0	Yes	yes	yes	yes	yes	yes	yes	yes	0.75
530	M	26	single	secondary	employed	less activity	1,000－9,999元	Rural cooperative medical care	≥30	yes	1_5	yes	173cm	58kg	unclear	unclear	unclear	unclear	unclear	unclear	unclear	unclear	1－2	once	0	yes	yes	yes	no	no	no	no	no	0.75
531	M	39	married	primary	employed	heavy activity	1,000－9,999元	self-funded	≥30	no	5－10	no	171cm	65kg	no	no	no	no	no	yes	yes	no	1－2	once	1	Yes	yes	no	yes	no	yes	yes	no	0.75
532	M	60	single	primary	employed	light-to-morderate activity	＜1,000元	self-funded	≥30	no	1_5	yes	181cm	100kg	no	no	no	no	unclear	yes	yes	unclear	1－2	once	1	Yes	yes	yes	no	yes	no	no	no	0.75
533	M	77	married	primary	unemployed	less activity	1,000－9,999元	Rural cooperative medical care	≥30	yes	<1	yes	156c m	60kg	no	yes	no	no	no	yes	yes	no	1－2	quartic	1	Yes	no	yes	no	no	no	no	no	0.75
534	F	78	married	primary	unemployed	less activity	1,000－9,999元	Rural cooperative medical care	≥30	yes	<1	yes	145c m	50kg	no	yes	no	no	no	no	no	no	1－2	quartic	1	Yes	no	no	no	no	no	no	no	0.75
535	F	48	married	primary	unemployed	less activity	＜1,000元	Rural cooperative medical care	<30	yes	<1	no	158cm	70kg	no	no	no	no	no	no	no	no	1－2	quartic	2	Yes	no	yes	no	no	no	no	no	1
536	F	67	married	secondary	unemployed	less activity	1,000－9,999元	Urban medical insurance	<30	yes	<1	no	158cm	51kg	no	no	no	no	no	yes	yes	no	1－2	quartic	1	Yes	no	no	no	no	no	no	no	1
537	M	48	married	secondary	unemployed	less activity	1,000－9,999元	Rural cooperative medical care	<30	yes	5－10	no	168cm	70kg	no	no	yes	yes	no	no	yes	yes	3	quartic	2	Yes	yes	yes	no	no	no	no	no	0.75
538	F	68	married	primary	unemployed	less activity	1,000－9,999元	Urban medical insurance	<30	yes	≥10	yes	158cm	62kg	yes	yes	yes	unclear	yes	unclear	yes	no	≥6	quartic	2	Yes	yes	yes	no	no	no	no	yes	总是
539	M	58	married	secondary	employed	less activity	1,000－9,999元	Urban medical insurance	<30	yes	<1	yes	168cm	60kg	no	no	no	no	no	no	no	no	1－2	quartic	1	Yes	no	no	no	no	no	no	no	1
540	M	46	married	secondary	employed	less activity	1,000－9,999元	Urban medical insurance	<30	yes	<1	yes	173cm	75kg	no	no	no	no	no	no	no	no	1－2	once	0	Yes	no	yes	yes	no	no	no	yes	0.75
541	F	52	married	primary	unemployed	less activity	1,000－9,999元	Urban medical insurance	≥30	yes	5－10	no	165cm	53kg	no	no	no	no	no	no	no	no	1－2	thrice	0	Yes	no	no	no	no	no	no	no	1
542	M	38	married	secondary	employed	less activity	1,000－9,999元	Urban medical insurance	≥30	yes	1_5年	yes	175cm	82kg	no	no	no	no	no	no	unclear	no	1－2	quartic	2	Yes	yes	yes	no	no	no	no	no	0.75
543	F	20	single	primary	unemployed	less activity	1,000－9,999元	Rural cooperative medical care	≥30	no	<1	no	160cm	73kg	no	no	no	no	no	no	no	no	1－2	quartic	1	Yes	no	no	no	no	no	no	no	1
544	M	57	married	secondary	employed	less activity	1,000－9,999元	Urban medical insurance	≥30	yes	5－10	no	169cm	73kg	no	no	no	unclear	no	no	yes	no	1－2	quartic	1	Yes	no	no	no	no	no	no	no	0.75
545	M	50	single	secondary	employed	less activity	1,000－9,999元	Urban medical insurance	<30	yes	1_5	no	170cm	75kg	no	no	no	no	no	no	no	no	1－2	once	1	Yes	no	no	no	no	no	no	no	1
546	M	43	married	primary	employed	less activity	1,000－9,999元	Rural cooperative medical care	<30	yes	<1	no	168cm	60kg	no	no	no	no	no	no	no	no	1－2	once	0	Yes	no	no	no	no	no	no	no	1
547	M	56	married	higher	employed	less activity	1,000－9,999元	Urban medical insurance	<30	yes	≥10	yes	179cm	81kg	yes	yes	yes	yes	no	unclear	yes	yes	3	once	≥3	no	yes	no	yes	no	no	no	no	1
548	M	35	single	primary	employed	heavy activity	1,000－9,999元	Rural cooperative medical care	≥30	yes	1_5	no	160cm	65kg	no	unclear	no	unclear	no	no	yes	yes	1－2	quartic	2	Yes	yes	yes	no	yes	yes	yes	yes	0.75
549	F	65	married	primary	employed	less activity	1,000－9,999元	Urban medical insurance	≥30	yes	1_5	yes	175cm	73kg	no	no	no	no	yes	no	no	unclear	1－2	quartic	2	Yes	yes	yes	no	no	no	no	yes	1
550	M	50	married	secondary	unemployed	less activity	1,000－9,999元	Urban medical insurance	≥30	yes	5－10	no	160cm	60kg	no	yes	yes	yes	yes	unclear	no	no	1－2	quartic	2	Yes	no	yes	no	no	yes	no	no	0.75
551	M	48	married	primary	unemployed	light-to-morderate activity	1,000－9,999元	Rural cooperative medical care	<30	yes	1_5	no	156cm	53kg	no	no	no	no	no	no	no	no	1－2	thrice	0	Yes	no	no	yes	no	no	no	yes	0.75
552	F	32	married	primary	unemployed	less activity	1,000－9,999元	Rural cooperative medical care	<30	yes	<1	yes	158cm	71kg	no	no	no	no	no	no	no	no	4－5	quartic	≥3	no	yes	no	no	no	no	no	no	1
553	M	68	married	primary	unemployed	less activity	1,000－9,999元	Rural cooperative medical care	≥30	yes	≥10	yes	178cm	74kg	yes	yes	yes	no	yes	no	no	no	4－5	once	≥3	no	yes	no	no	no	no	no	no	1
554	M	35	married	primary	unemployed	less activity	1,000－9,999元	Rural cooperative medical care	≥30	yes	<1	no	169cm	63kg	no	no	no	no	no	no	no	no	1－2	quartic	2	Yes	yes	no	no	no	no	no	no	1
555	M	47	married	secondary	employed	less activity	1,000－9,999元	Urban medical insurance	<30	yes	5－10	yes	170cm	73.5kg	no	no	no	unclear	yes	yes	yes	unclear	4－5	quartic	≥3	no	yes	yes	no	no	no	no	no	0.5
556	M	64	married	primary	unemployed	heavy activity	1,000－9,999元	Rural cooperative medical care	≥30	no	≥10	yes	175cm	75kg	no	no	yes	yes	yes	yes	yes	unclear	≥6	twice	≥3	no	yes	yes	yes	no	no	no	no	1
557	M	56	married	secondary	unemployed	less activity	1,000－9,999元	Urban medical insurance	<30	yes	≥10	yes	179cm	86kg	yes	yes	no	yes	yes	yes	yes	no	1－2	once	1	Yes	yes	no	yes	yes	no	no	no	1
558	F	42	married	primary	unemployed	less activity	＜1,000元	Rural cooperative medical care	<30	yes	1_5	no	160cm	70kg	no	no	yes	yes	yes	no	no	no	1－2	twice	1	Yes	yes	no	yes	no	no	no	no	1
559	M	69	married	primary	unemployed	light-to-morderate activity	＜1,000元	Rural cooperative medical care	<30	no	5－10	no	168cm	70kg	no	unclear	unclear	unclear	no	unclear	yes	unclear	4－5	twice	≥3	no	no	yes	yes	no	no	no	no	1
560	F	38	married	primary	unemployed	less activity	＜1,000元	self-funded	≥30	yes	≥10	yes	164cm	89kg	no	unclear	unclear	no	yes	yes	no	unclear	1－2	once	0	Yes	no	no	yes	yes	yes	no	no	0.75
561	F	28	married	secondary	unemployed	less activity	＜1,000元	self-funded	≥30	yes	≥10	no	155cm	53kg	no	no	no	yes	no	no	no	yes	1－2	thrice	0	Yes	no	no	no	no	no	no	no	1
562	M	27	married	secondary	unemployed	less activity	1,000－9,999元	Urban medical insurance	<30	yes	≥10	yes	175cm	75kg	no	unclear	no	no	no	no	yes	no	3	quartic	2	Yes	yes	no	no	no	no	no	no	1
563	M	65	married	primary	unemployed	less activity	1,000－9,999元	Urban medical insurance	<30	yes	1_5	no	165cm	65kg	yes	yes	unclear	unclear	no	yes	yes	yes	1－2	once	0	Yes	no	yes	yes	yes	yes	yes	no	0.75
564	M	62	married	secondary	unemployed	light-to-morderate activity	1,000－9,999元	Urban medical insurance	<30	yes	≥10	no	173cm	78kg	no	yes	unclear	no	no	no	yes	no	1－2	thrice	0	Yes	yes	no	yes	no	no	no	no	1
565	M	61	married	secondary	unemployed	less activity	1,000－9,999元	Urban medical insurance	<30	yes	≥10	yes	170cm	69kg	no	yes	unclear	no	no	no	no	no	1－2	twice	1	Yes	yes	yes	no	no	yes	no	no	1
566	F	60	married	secondary	unemployed	less activity	1,000－9,999元	Urban medical insurance	<30	yes	<1	yes	162cm	60kg	no	yes	no	no	no	no	yes	no	1－2	once	0	Yes	yes	no	yes	no	no	no	no	1
567	M	63	married	primary	unemployed	less activity	1,000－9,999元	Rural cooperative medical care	<30	yes	≥10	yes	162cm	65kg	no	no	no	no	no	no	no	no	1－2	once	1	Yes	no	no	no	no	no	yes	no	1
568	M	46	married	secondary	employed	less activity	1,000－9,999元	Urban medical insurance	<30	yes	5－10	no	180cm	82.5kg	no	no	no	no	yes	no	no	no	1－2	quartic	2	Yes	yes	yes	yes	no	yes	yes	no	0.5
569	F	38	married	primary	unemployed	less activity	1,000－9,999元	Rural cooperative medical care	<30	yes	≥10	yes	162	93kg	no	no	no	no	no	no	no	no	1－2	once	1	Yes	no	no	no	no	no	no	yes	1
570	M	62	married	primary	unemployed	less activity	＜1,000元	Urban medical insurance	<30	yes	≥10	yes	175	75kg	yes	yes	yes	yes	yes	yes	no	unclear	1－2	once	1	Yes	no	no	no	no	no	yes	yes	0.5
571	F	47	married	higher	employed	less activity	1,000－9,999元	Urban medical insurance	<30	yes	1_5	yes	155	49kg	no	yes	no	no	no	no	no	unclear	3	quartic	≥3	no	yes	no	no	no	no	no	yes	1
572	F	59	married	secondary	unemployed	less activity	1,000－9,999元	Urban medical insurance	≥30	yes	≥10	yes	156	50kg	no	no	no	no	no	yes	yes	no	3	quartic	2	Yes	yes	no	no	no	no	no	no	0.75
573	M	56	married	secondary	employed	less activity	1,000－9,999元	Urban medical insurance	≥30	yes	≥10	yes	169	74kg	no	yes	unclear	yes	no	yes	yes	unclear	4－5	quartic	≥3	no	no	yes	no	no	yes	no	no	0.25
574	M	43	married	secondary	employed	light-to-morderate activity	10,000-19,999元	Urban medical insurance	<30	yes	≥10	yes	175	90kg	no	yes	yes	unclear	yes	yes	yes	yes	4－5	quartic	≥3	no	yes	yes	yes	yes	yes	no	yes	0.5
575	M	57	married	secondary	employed	less activity	1,000－9,999元	Urban medical insurance	≥30	yes	≥10	yes	172	82kg	no	unclear	yes	unclear	no	unclear	yes	unclear	≥6	quartic	0	Yes	no	no	yes	no	no	no	no	1
576	M	41	married	secondary	employed	less activity	1,000－9,999元	Urban medical insurance	<30	yes	5－10	yes	175	64kg	no	yes	no	no	no	no	no	no	1－2	once	1	Yes	no	yes	yes	no	yes	yes	yes	0.25
577	M	52	married	secondary	employed	light-to-morderate activity	1,000－9,999元	Urban medical insurance	≥30	yes	5－10	no	176	85kg	no	unclear	unclear	unclear	no	yes	no	no	1－2	once	2	no	yes	yes	no	no	no	no	no	0.75
578	M	31	married	secondary	employed	less activity	1,000－9,999元	Urban medical insurance	<30	yes	<1	yes	183	117kg	no	no	no	yes	no	yes	no	no	1－2	once	0	yes	no	no	no	no	no	no	no	1
579	F	65	married	primary	unemployed	less activity	10,000-19,999元	Urban medical insurance	<30	no	5－10	yes	158	57kg	yes	yes	yes	no	yes	no	yes	yes	≥6	quartic	≥3	no	yes	no	no	no	no	yes	no	1
580	M	42	married	primary	employed	less activity	10,000-19,999	Urban medical insurance	<30	yes	≥10	yes	170	87kg	no	no	no	yes	yes	yes	yes	yes	≥6	quartic	≥3	no	yes	yes	no	no	no	yes	yes	0.5
581	M	63	married	primary	unemployed	less activity	1,000－9,999元	Urban medical insurance	≥30	yes	≥10	no	170	60kg	no	yes	yes	no	yes	no	no	no	4－5	quartic	≥3	no	no	yes	no	no	no	no	no	0.75
582	F	69	married	primary	unemployed	less activity	＜1,000元	Urban medical insurance	≥30	yes	≥10	no	165	70kg	no	yes	no	no	yes	yes	yes	unclear	4－5	quartic	≥3	no	yes	no	no	no	no	no	no	1
583	F	36	married	primary	unemployed	light-to-morderate activity	＜1,000元	Urban medical insurance	<30	yes	≥10	yes	160	52.5kg	no	no	no	no	yes	no	no	yes	3	thrice	0	Yes	no	no	no	no	no	no	no	1
584	M	50	married	primary	unemployed	less activity	＜1,000元	Rural cooperative medical care	≥30	yes	≥10	no	180	85kg	yes	yes	unclear	no	no	yes	no	no	4－5	quartic	≥3	no	no	yes	no	no	no	no	no	0.25
585	M	53	married	secondary	employed	less activity	1,000－9,999元	Urban medical insurance	<30	no	5－10	no	173c m	87.5kg	no	yes	yes	yes	yes	yes	yes	no	≥6	quartic	≥3	no	no	yes	no	yes	yes	no	no	0.75
586	F	29	married	primary	unemployed	less activity	1,000－9,999元	Rural cooperative medical care	<30	yes	1_5	no	155	63kg	no	yes	no	no	yes	unclear	yes	no	1－2	quartic	1	Yes	no	yes	no	no	no	no	no	1
587	F	55	married	primary	unemployed	less activity	1,000－9,999元	Urban medical insurance	<30	yes	≥10	no	155	60kg	no	no	yes	unclear	yes	no	no	no	1－2	quartic	2	no	yes	yes	yes	yes	no	no	no	1
588	M	43	married	secondary	employed	less activity	1,000－9,999元	Urban medical insurance	≥30	no	5－10	no	178	95kg	no	no	no	no	no	no	no	no	1－2	quartic	2	Yes	yes	yes	no	no	no	no	yes	0.75
589	F	65	married	primary	unemployed	light-to-morderate activity	1,000－9,999元	Urban medical insurance	≥30	yes	5－10	yes	158	68kg	yes	yes	unclear	unclear	yes	yes	yes	unclear	≥6	quartic	≥3	no	yes	yes	no	no	yes	no	yes	0.75
590	F	48	married	primary	unemployed	less activity	1,000－9,999元	Rural cooperative medical care	≥30	yes	5－10	no	151cm	56kg	yes	no	no	no	yes	no	no	no	3	quartic	≥3	no	yes	yes	no	no	no	yes	no	0.75
591	F	66	married	primary	unemployed	light-to-morderate activity	1,000－9,999元	Urban medical insurance	≥30	no	1_5	no	157	50kg	yes	unclear	unclear	unclear	unclear	unclear	no	unclear	4－5	quartic	≥3	no	no	yes	no	no	no	no	no	0.75
592	M	51	married	primary	unemployed	light-to-morderate activity	1,000－9,999元	Rural cooperative medical care	≥30	yes	<1	no	170	68kg	unclear	unclear	unclear	unclear	unclear	unclear	yes	unclear	1－2	twice	0	Yes	no	yes	yes	yes	yes	yes	yes	0.5
593	F	59	married	secondary	unemployed	less activity	1,000－9,999元	Urban medical insurance	<30	yes	1_5	yes	160	65kg	no	no	no	no	no	no	yes	no	1－2	quartic	1	Yes	no	yes	yes	no	no	no	no	0.5
594	M	54	married	secondary	employed	less activity	1,000－9,999元	Urban medical insurance	<30	no	<1	no	161	65kg	no	no	no	no	no	yes	yes	no	1－2	quartic	1	Yes	no	yes	yes	no	no	no	yes	1
595	M	70	married	primary	unemployed	less activity	＜1,000元	Rural cooperative medical care	≥30	yes	5－10	no	170	75kg	no	unclear	yes	no	yes	unclear	no	unclear	1－2	once	0	Yes	no	no	no	no	no	no	no	1
596	F	57	single	primary	unemployed	less activity	＜1,000元	Rural cooperative medical care	<30	yes	5－10	yes	160	60kg	no	no	no	no	no	no	no	no	1－2	quartic	1	Yes	no	yes	yes	no	no	no	no	0.75
597	F	67	married	primary	unemployed	less activity	1,000－9,999元	Urban medical insurance	≥30	yes	1_5	yes	150	56kg	no	yes	yes	unclear	no	unclear	yes	unclear	4－5	quartic	≥3	no	yes	yes	no	no	no	no	no	0.5
598	M	60	married	secondary	employed	less activity	1,000－9,999元	Urban medical insurance	≥30	yes	1_5	yes	172	70kg	no	no	no	no	yes	yes	no	no	3	quartic	1	Yes	no	no	yes	no	no	no	no	1
599	F	63	married	secondary	unemployed	less activity	＜1,000元	Rural cooperative medical care	≥30	yes	5－10	no	165	64kg	no	unclear	unclear	unclear	no	yes	no	unclear	1－2	once	0	Yes	no	no	no	no	no	no	no	1
600	F	27	single	secondary	employed	less activity	1,000－9,999元	Rural cooperative medical care	≥30	yes	<1	no	158c m	67kg	no	no	no	no	no	no	no	no	≥6	quartic	≥3	no	yes	no	no	no	no	no	no	1
601	F	65	married	primary	unemployed	less activity	＜1,000元	Rural cooperative medical care	≥30	no	<1	no	155	57kg	no	unclear	unclear	unclear	yes	yes	yes	unclear	1－2	once	0	Yes	no	no	no	no	no	no	no	1
602	M	69	married	secondary	unemployed	light-to-morderate activity	1,000－9,999元	Urban medical insurance	<30	yes	5－10	no	173	70kg	no	yes	yes	no	no	yes	yes	yes	4－5	once	≥3	no	no	yes	no	no	no	no	no	1
603	M	51	married	primary	employed	less activity	1,000－9,999元	Urban medical insurance	<30	yes	1_5	yes	166	70kg	no	no	no	no	yes	yes	yes	no	1－2	once	0	Yes	no	no	no	yes	no	no	no	1
604	M	33	married	secondary	employed	less activity	1,000－9,999元	Urban medical insurance	<30	yes	<1	no	177c m	86kg	no	no	no	no	no	yes	no	no	1－2	quartic	1	Yes	no	no	yes	no	no	no	no	1
605	M	78	married	secondary	unemployed	light-to-morderate activity	1,000－9,999元	Urban medical insurance	<30	yes	≥10	yes	169	63kg	no	yes	yes	unclear	yes	unclear	yes	unclear	≥6	twice	≥3	no	no	yes	no	no	no	yes	no	1
606	M	66	married	primary	unemployed	less activity	＜1,000元	Rural cooperative medical care	<30	no	<1	no	167	61.5kg	unclear	unclear	unclear	unclear	no	unclear	yes	unclear	4－5	quartic	≥3	no	no	no	no	no	no	no	no	1
607	F	73	married	primary	unemployed	less activity	1,000－9,999元	Rural cooperative medical care	<30	yes	≥10	no	158	80kg	no	no	yes	unclear	no	yes	yes	no	3	once	1	Yes	no	yes	no	no	no	yes	no	1
608	F	65	married	primary	unemployed	light-to-morderate activity	＜1,000元	Rural cooperative medical care	<30	no	≥10	no	170	81.5kg	no	unclear	yes	unclear	no	yes	yes	unclear	≥6	once	≥3	no	yes	yes	no	no	no	no	no	1
609	M	56	married	secondary	unemployed	less activity	1,000－9,999元	Urban medical insurance	<30	yes	≥10	yes	170	89kg	no	yes	yes	no	no	yes	yes	no	4－5	quartic	≥3	no	yes	yes	no	no	yes	no	no	0.5
610	F	59	single	primary	unemployed	heavy activity	1,000－9,999元	Rural cooperative medical care	≥30	yes	<1	no	156cm	45kg	no	no	no	no	no	no	no	no	3	quartic	2	Yes	yes	no	no	no	no	no	no	0.75
611	F	50	married	primary	unemployed	less activity	＜1,000元	Rural cooperative medical care	≥30	no	5－10	yes	162	65kg	yes	yes	yes	unclear	yes	yes	yes	unclear	≥6	quartic	≥3	no	no	yes	no	no	no	no	no	0.75
612	M	65	married	primary	unemployed	heavy activity	1,000－9,999元	Urban medical insurance	≥30	yes	1_5	no	163	80kg	yes	yes	unclear	unclear	no	yes	yes	yes	4－5	thrice	0	Yes	no	no	no	no	no	no	no	1
613	M	49	single	primary	unemployed	less activity	1,000－9,999元	Rural cooperative medical care	<30	yes	1_5	yes	170	90kg	unclear	unclear	unclear	unclear	yes	yes	yes	unclear	3	twice	0	yes	yes	yes	yes	no	yes	yes	yes	0.25
614	M	78	married	secondary	unemployed	less activity	1,000－9,999元	Urban medical insurance	<30	yes	≥10	yes	162	65kg	no	yes	unclear	unclear	unclear	unclear	yes	unclear	4－5	quartic	≥3	no	yes	no	no	no	no	no	no	1
615	F	68	married	primary	unemployed	less activity	＜1,000元	Rural cooperative medical care	≥30	yes	≥10	no	162	45kg	yes	yes	no	unclear	yes	yes	yes	unclear	4－5	quartic	≥3	no	yes	yes	yes	no	yes	no	no	0.75
616	F	62	married	primary	unemployed	less activity	＜1,000元	Rural cooperative medical care	<30	yes	≥10	yes	167	61kg	yes	no	no	no	yes	yes	yes	no	4－5	twice	≥3	no	yes	yes	no	yes	no	no	no	0.75
617	M	63	married	secondary	unemployed	heavy activity	10,000-19,999元	Rural cooperative medical care	≥30	yes	1_5	no	170	42kg	yes	yes	no	no	no	unclear	no	no	4－5	quartic	≥3	no	no	yes	no	no	no	no	no	0.25
618	M	61	married	secondary	unemployed	light-to-morderate activity	10,000-19,999元	Urban medical insurance	<30	yes	≥10	no	165	61kg	no	yes	unclear	unclear	no	yes	no	unclear	4－5	thrice	0	Yes	no	no	no	no	no	no	no	1
619	F	79	married	primary	unemployed	less activity	＜1,000元	Rural cooperative medical care	≥30	yes	1_5	no	165	75kg	no	unclear	no	unclear	no	unclear	yes	unclear	4－5	once	≥3	no	no	no	no	no	no	no	no	1
620	M	61	married	primary	unemployed	less activity	1,000－9,999元	Urban medical insurance	≥30	yes	1_5	no	168cm	95kg	no	yes	yes	unclear	no	yes	yes	unclear	3	quartic	1	Yes	no	yes	no	yes	yes	yes	yes	0.25
621	F	73	married	primary	unemployed	less activity	1,000－9,999元	Urban medical insurance	<30	yes	≥10	yes	165	62kg	unclear	yes	yes	yes	no	yes	yes	yes	3	once	1	Yes	no	yes	no	no	no	no	no	0.75
622	M	54	married	secondary	employed	less activity	1,000－9,999元	Urban medical insurance	<30	yes	≥10	yes	173	70kg	yes	yes	no	unclear	yes	no	yes	unclear	3	thrice	0	Yes	no	no	no	no	no	no	no	1
623	F	75	married	primary	unemployed	less activity	1,000－9,999元	Urban medical insurance	≥30	yes	≥10	yes	166	59kg	yes	yes	yes	unclear	yes	yes	no	unclear	≥6	twice	≥3	no	yes	no	no	no	no	no	no	1
624	M	52	married	secondary	employed	less activity	10,000-19,999元	Urban medical insurance	<30	yes	5－10	yes	170	71kg	no	no	unclear	no	no	yes	no	no	3	quartic	2	no	yes	no	no	no	no	no	no	0.75
625	M	57	married	secondary	employed	less activity	10,000-19,999元	Urban medical insurance	<30	yes	≥10	no	180	110kg	yes	yes	no	unclear	no	yes	yes	yes	≥6	quartic	≥3	no	no	yes	no	yes	yes	no	no	0.5
626	F	71	married	primary	unemployed	less activity	＜1,000元	Rural cooperative medical care	<30	no	≥10	no	165	70kg	yes	yes	yes	unclear	no	yes	yes	unclear	1－2	quartic	1	Yes	no	no	no	no	no	no	no	1
627	M	53	married	secondary	employed	less activity	1,000－9,999元	Urban medical insurance	<30	no	5－10	no	176cm	85kg	no	no	no	unclear	yes	yes	yes	yes	1－2	thrice	0	Yes	no	no	no	no	no	no	no	1
628	M	66	married	secondary	unemployed	less activity	1,000－9,999元	Urban medical insurance	≥30	yes	≥10	yes	170	85kg	no	no	yes	yes	no	no	yes	yes	3	thrice	0	Yes	no	no	no	no	no	no	no	1
629	M	63	married	primary	unemployed	less activity	＜1,000元	Urban medical insurance	<30	yes	≥10	yes	173	75kg	no	no	yes	unclear	yes	unclear	yes	yes	≥6	quartic	≥3	no	no	yes	no	no	yes	no	no	0.25
630	M	76	single	secondary	unemployed	less activity	1,000－9,999元	Urban medical insurance	<30	yes	≥10	no	170	79kg	no	unclear	yes	no	no	yes	yes	yes	1－2	twice	1	Yes	no	no	yes	no	no	no	no	1
631	F	64	married	primary	unemployed	less activity	＜1,000元	Rural cooperative medical care	≥30	yes	1_5	no	155	80kg	no	unclear	unclear	yes	yes	yes	yes	yes	1－2	twice	1	Yes	no	no	no	no	no	no	no	1
632	M	61	married	primary	unemployed	heavy activity	1,000－9,999元	Rural cooperative medical care	≥30	yes	5－10	yes	165	65kg	yes	yes	unclear	unclear	yes	yes	yes	unclear	≥6	quartic	≥3	no	no	yes	no	no	yes	no	no	1
633	M	43	married	primary	unemployed	less activity	10,000-19,999元	Rural cooperative medical care	≥30	no	≥10	no	170	80kg	no	unclear	no	yes	yes	no	no	no	1－2	once	0	yes	no	yes	yes	no	yes	no	no	0.75
634	M	55	married	secondary	employed	less activity	1,000－9,999元	Urban medical insurance	<30	yes	≥10	yes	183	80kg	yes	yes	yes	unclear	yes	no	no	no	≥6	twice	≥3	no	no	yes	no	no	no	no	yes	0.75
635	F	63	married	secondary	unemployed	less activity	1,000－9,999元	Urban medical insurance	<30	yes	1_5	yes	156	75kg	no	yes	yes	unclear	no	yes	no	no	4－5	quartic	≥3	no	yes	yes	no	no	no	no	no	1
636	F	57	married	primary	unemployed	heavy activity	＜1,000元	Rural cooperative medical care	≥30	yes	≥10	no	158	62.5kg	no	unclear	no	unclear	no	unclear	yes	unclear	3	quartic	1	Yes	no	yes	no	no	yes	no	no	0.25
637	F	58	married	secondary	unemployed	heavy activity	1,000－9,999元	Urban medical insurance	<30	yes	≥10	no	158	69kg	no	no	yes	unclear	yes	unclear	no	unclear	1－2	quartic	2	Yes	yes	yes	no	no	yes	no	no	0.75
638	F	68	married	primary	unemployed	less activity	1,000－9,999元	Urban medical insurance	<30	yes	≥10	yes	162	59kg	yes	unclear	unclear	unclear	no	unclear	yes	unclear	1－2	quartic	1	Yes	no	no	no	no	no	no	no	1
639	M	69	married	primary	unemployed	less activity	＜1,000元	Urban medical insurance	≥30	no	≥10	no	173	76kg	no	yes	no	no	yes	yes	yes	yes	4－5	quartic	1	Yes	no	no	no	no	no	no	no	0.75
640	M	54	married	primary	unemployed	light-to-morderate activity	1,000－9,999元	Rural cooperative medical care	≥30	yes	≥10	no	165	83kg	no	yes	no	yes	no	yes	yes	unclear	1－2	quartic	0	yes	no	yes	no	no	no	no	no	1
641	F	54	married	primary	unemployed	light-to-morderate activity	＜1,000元	Urban medical insurance	≥30	yes	1_5	yes	162	70kg	unclear	no	no	unclear	no	yes	no	unclear	1－2	quartic	1	Yes	no	yes	yes	no	yes	yes	no	0.25
642	M	54	married	secondary	unemployed	less activity	1,000－9,999元	Urban medical insurance	<30	yes	5－10	no	170	80kg	no	unclear	unclear	unclear	unclear	unclear	yes	unclear	3	twice	2	Yes	yes	yes	no	no	yes	yes	yes	0.75
643	M	50	married	primary	employed	less activity	1,000－9,999元	Urban medical insurance	<30	yes	1_5	no	172	85kg	unclear	yes	no	unclear	no	yes	yes	unclear	1－2	quartic	0	yes	no	yes	no	no	yes	no	yes	0.75
644	M	50	married	secondary	employed	light-to-morderate activity	1,000－9,999元	Urban medical insurance	≥30	yes	5－10	no	169	75kg	no	no	no	no	no	no	no	no	1－2	quartic	1	Yes	no	yes	no	no	yes	no	no	0.5
645	F	50	married	primary	unemployed	heavy activity	1,000－9,999元	Urban medical insurance	<30	yes	≥10	no	155	55kg	no	no	no	no	no	unclear	no	unclear	4－5	thrice	0	Yes	no	yes	yes	no	no	no	no	0.25
646	F	53	married	primary	unemployed	light-to-morderate activity	1,000－9,999元	Urban medical insurance	≥30	yes	5－10	yes	154	60kg	no	no	unclear	unclear	no	unclear	no	unclear	4－5	quartic	≥3	no	yes	no	no	no	no	no	no	1
647	F	70	married	primary	unemployed	heavy activity	＜1,000元	Urban medical insurance	<30	yes	≥10	yes	153	51kg	no	yes	yes	no	no	no	yes	no	1－2	once	0	Yes	no	no	yes	no	no	no	no	1
648	M	53	married	primary	employed	less activity	1,000－9,999元	Urban medical insurance	<30	yes	≥10	no	174	82kg	yes	yes	yes	unclear	no	yes	no	unclear	4－5	once	≥3	no	no	no	no	no	no	no	no	1
649	M	60	married	secondary	unemployed	less activity	＜1,000元	Urban medical insurance	<30	yes	5－10	no	170	75kg	no	yes	no	unclear	yes	yes	no	unclear	4－5	quartic	≥3	no	yes	yes	no	yes	yes	no	yes	0.75
650	M	59	married	secondary	unemployed	less activity	＜1,000元	Rural cooperative medical care	≥30	yes	1_5	yes	170	70kg	no	unclear	yes	unclear	yes	yes	no	unclear	4－5	quartic	2	Yes	yes	yes	no	no	yes	no	yes	1
651	M	67	married	primary	unemployed	light-to-morderate activity	1,000－9,999元	Urban medical insurance	<30	yes	<1	yes	175	67kg	yes	yes	yes	no	no	yes	yes	no	≥6	quartic	≥3	no	yes	yes	no	no	no	no	yes	0.5
652	F	60	married	primary	unemployed	less activity	＜1,000元	Rural cooperative medical care	≥30	yes	<1	no	160	60kg	no	unclear	unclear	unclear	yes	yes	yes	no	4－5	thrice	0	Yes	yes	no	no	no	no	no	no	1
653	M	60	married	primary	employed	heavy activity	1,000－9,999元	Urban medical insurance	≥30	yes	≥10	yes	168	60kg	yes	yes	unclear	no	yes	no	no	no	3	thrice	0	Yes	no	no	no	no	no	no	no	1
654	M	42	married	primary	employed	light-to-morderate activity	1,000－9,999元	Urban medical insurance	<30	yes	5－10	no	162c m	66kg	no	no	no	no	yes	yes	yes	no	1－2	quartic	2	Yes	yes	yes	no	no	no	no	no	0.75
655	M	60	married	primary	unemployed	less activity	1,000－9,999元	Urban medical insurance	<30	yes	≥10	no	176	60kg	no	no	yes	no	no	no	yes	no	1－2	quartic	1	Yes	no	yes	no	no	yes	no	no	0.75
656	M	64	married	secondary	unemployed	less activity	1,000－9,999元	Rural cooperative medical care	<30	yes	<1	no	170c m	52kg	no	no	no	no	yes	no	no	no	4－5	quartic	≥3	no	yes	no	no	no	no	no	no	1
657	M	33	married	primary	employed	less activity	1,000－9,999元	Urban medical insurance	<30	yes	<1	no	175	84kg	no	no	no	no	no	yes	no	yes	4－5	once	≥3	no	yes	yes	no	no	no	no	no	0.5
658	M	33	married	primary	employed	less activity	1,000－9,999元	Urban medical insurance	≥30	yes	<1	no	176	86kg	no	no	no	no	no	yes	no	yes	4－5	quartic	≥3	no	no	yes	no	no	no	no	no	0.5
659	F	74	married	primary	unemployed	less activity	＜1,000元	Urban medical insurance	<30	yes	1_5年	no	155	55kg	no	no	no	no	no	yes	yes	no	3	once	1	Yes	yes	yes	yes	no	no	no	no	1
660	M	52	married	secondary	employed	less activity	1,000－9,999元	Urban medical insurance	<30	yes	5－10	yes	169cm	74kg	no	no	no	no	yes	yes	yes	no	4-5	quartic	≥3	no	no	yes	no	yes	no	no	no	0.75
661	M	65	married	primary	unemployed	less activity	1,000－9,999元	Urban medical insurance	<30	no	5－10	yes	174	60kg	yes	yes	yes	no	yes	yes	yes	yes	4－5	quartic	≥3	no	yes	no	no	no	no	no	no	0.75
662	F	39	married	primary	unemployed	less activity	1,000－9,999元	Rural cooperative medical care	<30	yes	1_5	no	165cm	110kg	no	no	no	no	no	no	no	no	1－2	quartic	1	Yes	no	no	no	no	no	no	no	0.75
663	M	39	married	primary	employed	heavy activity	1,000－9,999元	Rural cooperative medical care	<30	yes	<1	no	165cm	60kg	no	no	no	no	no	no	no	no	1－2	quartic	2	Yes	yes	no	no	no	no	no	no	0.75
664	M	65	married	primary	unemployed	less activity	1,000－9,999元	Urban medical insurance	<30	yes	<1	yes	180	102kg	no	no	no	unclear	yes	yes	yes	unclear	≥6	twice	≥3	no	yes	yes	no	no	no	no	yes	0.75
665	F	60	married	primary	unemployed	less activity	1,000－9,999元	Urban medical insurance	<30	yes	5－10	yes	156	56kg	yes	yes	yes	yes	yes	yes	yes	yes	4－5	quartic	≥3	no	no	yes	no	no	yes	no	yes	0.75
666	F	56	married	primary	employed	less activity	1,000－9,999元	Urban medical insurance	<30	yes	5－10	no	172	70kg	no	yes	no	unclear	yes	no	no	no	1－2	thrice	0	Yes	no	yes	no	no	no	no	no	0.75
667	F	56	single	primary	unemployed	less activity	1,000－9,999元	Rural cooperative medical care	≥30	yes	5－10	yes	160	60kg	no	yes	no	no	yes	no	yes	no	3	quartic	2	Yes	yes	no	no	no	yes	yes	no	0.75
668	F	67	married	primary	employed	less activity	1,000－9,999元	Urban medical insurance	<30	yes	1_5	yes	150	60kg	no	no	no	no	yes	yes	yes	no	4－5	quartic	≥3	no	yes	yes	yes	no	no	no	yes	0.25
669	M	50	married	secondary	employed	less activity	1,000－9,999元	Urban medical insurance	<30	yes	<1	yes	179	75公斤	no	no	no	no	no	no	no	no	1－2	once	0	Yes	yes	yes	yes	no	yes	yes	yes	0.75
670	F	47	married	secondary	employed	less activity	1,000－9,999元	Urban medical insurance	≥30	yes	5－10	yes	160cm	55c m	no	no	no	no	no	no	yes	no	1－2	quartic	2	Yes	yes	yes	no	no	no	no	no	0.75
671	M	46	single	primary	employed	light-to-morderate activity	1,000－9,999元	Rural cooperative medical care	<30	yes	5－10	yes	170	65kg	no	yes	yes	no	yes	yes	yes	no	1－2	once	2	Yes	yes	yes	no	yes	yes	yes	yes	1
672	M	46	married	primary	unemployed	less activity	1,000－9,999元	Rural cooperative medical care	<30	no	<1	no	170cm	80kg	no	no	no	no	no	yes	no	no	1－2	once	0	Yes	no	no	yes	no	yes	yes	yes	0.75
673	F	51	single	secondary	employed	less activity	1,000－9,999元	Urban medical insurance	<30	yes	5－10	no	175cm	58kg	no	no	no	no	no	no	no	no	1－2	thrice	0	Yes	no	no	no	no	no	no	no	1
674	F	58	married	primary	unemployed	less activity	1,000－9,999元	Urban medical insurance	<30	yes	≥10	no	163	55kg	yes	no	yes	unclear	no	no	yes	unclear	1－2	once	0	Yes	no	yes	no	no	yes	no	no	0.75
675	F	79	married	primary	unemployed	less activity	1,000－9,999元	Urban medical insurance	<30	yes	5－10	yes	164	65kg	yes	yes	yes	no	no	yes	yes	no	4－5	quartic	≥3	no	no	no	yes	no	no	yes	no	1
676	F	51	married	primary	unemployed	heavy activity	1,000－9,999元	Rural cooperative medical care	≥30	yes	<1	yes	153c m	64kg	no	no	no	no	no	no	yes	no	1－2	quartic	2	Yes	yes	yes	no	no	no	no	no	0.75
677	F	41	married	primary	unemployed	heavy activity	1,000－9,999元	Rural cooperative medical care	≥30	yes	<1	no	165c m	80kg	no	no	no	no	no	no	no	no	1－2	quartic	1	Yes	yes	no	no	no	no	no	no	0.75
678	M	39	married	secondary	unemployed	light-to-morderate activity	1,000－9,999元	Rural cooperative medical care	<30	yes	5－10	yes	169cm	70kg	no	no	no	no	no	yes	no	yes	4－5	quartic	≥3	no	yes	yes	no	no	no	no	no	0.75
679	M	51	single	primary	employed	less activity	1,000－9,999元	Rural cooperative medical care	<30	yes	<1	no	168cm	56kg	no	no	no	no	no	yes	no	no	1－2	quartic	2	no	yes	yes	no	no	yes	no	no	0.75
680	M	67	married	primary	unemployed	less activity	1,000－9,999元	Rural cooperative medical care	≥30	yes	≥10	yes	160cm	70kg	yes	yes	yes	yes	yes	yes	yes	yes	1－2	once	1	Yes	no	yes	no	no	no	no	no	1
681	F	56	married	primary	unemployed	less activity	1,000－9,999元	Rural cooperative medical care	<30	yes	<1	no	160cm	60kg	no	no	no	no	no	no	yes	no	≥6	quartic	≥3	no	yes	no	no	no	no	no	no	0.75
682	F	50	single	primary	unemployed	less activity	1,000－9,999元	Urban medical insurance	≥30	yes	<1	yes	164	65kg	no	unclear	unclear	unclear	no	no	no	unclear	1－2	quartic	1	Yes	yes	yes	no	yes	yes	yes	yes	0.75
683	M	46	married	secondary	employed	light-to-morderate activity	1,000－9,999元	Urban medical insurance	<30	yes	5－10	no	180	85kg	no	no	unclear	unclear	yes	no	yes	unclear	1－2	once	0	Yes	no	no	no	no	no	no	no	1
684	F	56	married	higher	employed	less activity	1,000－9,999元	Urban medical insurance	<30	yes	5－10	no	164	78kg	no	yes	yes	no	yes	yes	no	no	1－2	quartic	0	yes	yes	yes	no	no	yes	no	no	1
685	M	62	married	primary	employed	less activity	1,000－9,999元	Urban medical insurance	≥30	yes	≥10	yes	170	70kg	no	yes	unclear	unclear	no	no	no	unclear	1－2	once	0	Yes	no	no	no	no	no	no	no	1
686	M	59	married	secondary	employed	heavy activity	1,000－9,999元	Urban medical insurance	<30	yes	1_5	yes	172	80kg	yes	yes	unclear	unclear	yes	yes	yes	unclear	≥6	quartic	≥3	no	yes	no	no	no	no	no	no	1
687	M	68	married	secondary	unemployed	less activity	1,000－9,999元	Urban medical insurance	<30	yes	≥10	no	174	80kg	no	yes	unclear	unclear	yes	no	yes	no	4－5	quartic	≥3	no	yes	no	no	no	no	no	no	1
688	F	61	married	primary	unemployed	light-to-morderate activity	＜1,000元	Urban medical insurance	<30	yes	1_5	no	162	72kg	yes	yes	yes	unclear	yes	yes	yes	unclear	1－2	quartic	1	Yes	no	yes	no	no	yes	no	yes	0.5
689	M	35	married	secondary	employed	less activity	10,000-19,999元	Urban medical insurance	<30	yes	≥10	no	170	75kg	no	yes	unclear	unclear	yes	yes	yes	unclear	1－2	quartic	1	Yes	yes	yes	no	no	yes	no	no	0.5
690	M	35	married	higher	employed	less activity	1,000－9,999元	Urban medical insurance	≥30	yes	1_5	no	175	80kg	no	yes	unclear	unclear	no	yes	yes	unclear	3	twice	2	Yes	yes	yes	no	no	yes	no	no	1
691	M	59	married	secondary	unemployed	less activity	＜1,000元	Urban medical insurance	<30	yes	1_5	yes	174	90kg	yes	yes	unclear	unclear	no	yes	yes	no	≥6	quartic	≥3	no	yes	no	no	no	no	no	no	1
692	M	56	married	higher	employed	less activity	1,000－9,999元	Urban medical insurance	<30	yes	≥10	no	179	80kg	yes	yes	yes	no	yes	yes	yes	unclear	≥6	quartic	≥3	no	yes	no	no	no	no	no	no	1
693	M	29	married	secondary	employed	less activity	10,000-19,999	Urban medical insurance	<30	yes	1_5	yes	170	85kg	yes	yes	unclear	unclear	no	yes	no	no	1－2	twice	1	Yes	no	yes	yes	yes	yes	yes	yes	0.5
694	M	64	married	primary	unemployed	heavy activity	1,000－9,999元	Rural cooperative medical care	≥30	yes	≥10	yes	180	75kg	no	yes	unclear	unclear	yes	yes	yes	unclear	≥6	twice	≥3	no	yes	yes	no	no	yes	no	no	0.75
695	M	58	married	secondary	employed	light-to-morderate activity	1,000－9,999元	Urban medical insurance	<30	yes	5－10	yes	175	65.4kg	no	yes	unclear	no	yes	no	yes	no	1－2	quartic	1	Yes	no	yes	no	no	no	no	no	1
696	M	63	married	secondary	unemployed	less activity	1,000－9,999元	Urban medical insurance	<30	yes	5－10	yes	180	85kg	no	yes	no	unclear	no	yes	yes	no	4－5	twice	≥3	no	yes	yes	no	no	yes	no	yes	0.75
697	F	28	married	higher	employed	less activity	1,000－9,999元	Urban medical insurance	<30	yes	5－10	no	154	55kg	no	no	no	no	no	no	no	no	1－2	once	0	Yes	no	no	no	no	no	no	no	1
698	M	41	single	primary	unemployed	less activity	＜1,000元	Rural cooperative medical care	≥30	no	<1	yes	164	70kg	no	no	no	no	no	no	no	no	1－2	quartic	1	Yes	yes	no	no	no	no	no	no	1
699	F	57	married	primary	employed	light-to-morderate activity	1,000－9,999元	Urban medical insurance	≥30	yes	≥10	no	165	56kg	no	yes	yes	unclear	yes	unclear	no	unclear	3	quartic	1	Yes	yes	yes	no	yes	yes	yes	yes	0.75
700	M	45	married	secondary	employed	light-to-morderate activity	1,000－9,999元	Urban medical insurance	≥30	yes	5－10	no	172	68kg	no	yes	yes	unclear	yes	no	yes	no	1－2	quartic	2	Yes	yes	yes	no	no	yes	no	yes	0.75
701	F	62	married	primary	unemployed	light-to-morderate activity	＜1,000元	Urban medical insurance	≥30	yes	≥10	yes	160	56kg	no	yes	unclear	unclear	no	no	no	unclear	3	quartic	1	Yes	yes	yes	no	yes	yes	no	no	0.75
702	F	59	married	secondary	employed	light-to-morderate activity	1,000－9,999元	Urban medical insurance	<30	yes	≥10	yes	164	71kg	no	yes	yes	unclear	yes	yes	no	no	≥6	once	≥3	no	yes	yes	no	no	yes	no	no	1
703	M	59	married	secondary	employed	less activity	1,000－9,999元	Urban medical insurance	<30	yes	<1	yes	173	84kg	no	yes	yes	unclear	yes	no	yes	yes	4－5	quartic	≥3	no	yes	yes	no	no	yes	no	yes	0.75
704	M	61	married	secondary	unemployed	less activity	1,000－9,999元	Urban medical insurance	<30	yes	≥10	yes	178	90kg	yes	yes	yes	yes	yes	yes	no	no	≥6	quartic	≥3	no	yes	yes	no	yes	yes	yes	yes	0.5
705	M	48	married	secondary	employed	less activity	1,000－9,999元	Urban medical insurance	<30	no	≥10	yes	168	68.5kg	no	yes	no	no	yes	yes	no	no	4－5	quartic	≥3	no	yes	yes	no	no	no	no	no	1
706	M	55	married	secondary	employed	less activity	1,000－9,999元	Urban medical insurance	<30	yes	5－10	no	168	70kg	no	yes	yes	unclear	yes	yes	yes	no	≥6	quartic	≥3	no	yes	yes	no	no	yes	no	no	0.75
707	F	65	married	secondary	unemployed	less activity	1,000－9,999元	Urban medical insurance	<30	yes	≥10	no	162	76kg	no	yes	no	unclear	yes	yes	no	no	≥6	once	≥3	no	yes	yes	no	yes	yes	yes	yes	0.75
708	M	45	married	secondary	employed	heavy activity	1,000－9,999元	Urban medical insurance	<30	yes	1_5	yes	170	68kg	no	yes	unclear	unclear	yes	yes	yes	unclear	4－5	quartic	≥3	no	yes	yes	no	no	yes	no	no	0.75
709	M	52	married	primary	unemployed	light-to-morderate activity	1,000－9,999元	Urban medical insurance	<30	yes	≥10	no	170	88kg	no	unclear	unclear	unclear	yes	yes	yes	unclear	3	quartic	2	Yes	yes	yes	no	no	yes	no	no	1
710	M	56	married	secondary	employed	light-to-morderate activity	1,000－9,999元	Urban medical insurance	<30	yes	1_5	no	173	95kg	no	yes	unclear	unclear	yes	yes	yes	unclear	4－5	twice	≥3	no	yes	no	no	no	no	no	no	1
711	F	48	married	secondary	employed	less activity	1,000－9,999元	Urban medical insurance	<30	yes	≥10	yes	170	71kg	yes	yes	no	unclear	yes	yes	no	unclear	4－5	quartic	≥3	no	yes	yes	no	no	yes	no	no	1
712	M	42	married	secondary	unemployed	light-to-morderate activity	1,000－9,999元	Urban medical insurance	<30	no	1_5	no	167	73kg	no	yes	no	unclear	yes	no	yes	unclear	1－2	thrice	0	Yes	no	no	no	no	no	no	no	1
713	F	31	single	secondary	employed	less activity	1,000－9,999元	Urban medical insurance	<30	yes	1_5	no	173	92.5kg	no	no	unclear	unclear	no	yes	no	yes	3	quartic	1	Yes	no	yes	no	no	yes	no	yes	0.5
714	M	55	single	secondary	employed	light-to-morderate activity	1,000－9,999元	Urban medical insurance	≥30	yes	≥10	no	169	74kg	no	yes	unclear	unclear	yes	yes	yes	unclear	3	thrice	0	Yes	yes	yes	no	no	yes	no	no	1
715	F	62	married	primary	unemployed	light-to-morderate activity	＜1,000元	Urban medical insurance	<30	yes	5－10	yes	165	70kg	no	yes	unclear	unclear	yes	yes	yes	unclear	≥6	once	≥3	no	yes	yes	no	no	yes	no	yes	0.75
716	F	62	married	secondary	unemployed	less activity	1,000－9,999元	Urban medical insurance	<30	yes	≥10	yes	163	75kg	yes	yes	unclear	unclear	yes	unclear	no	unclear	3	quartic	0	yes	yes	yes	no	no	yes	yes	no	0.5
717	M	60	married	primary	unemployed	less activity	＜1,000元	Urban medical insurance	≥30	yes	5－10	no	178	90kg	no	yes	unclear	unclear	yes	no	yes	unclear	≥6	quartic	≥3	no	yes	yes	no	no	yes	no	yes	0.75
718	F	74	married	secondary	unemployed	less activity	1,000－9,999元	Urban medical insurance	≥30	yes	5－10	yes	163	72kg	yes	unclear	yes	unclear	yes	no	yes	unclear	4－5	once	≥3	no	yes	yes	no	no	yes	no	no	1
719	M	55	married	secondary	employed	light-to-morderate activity	1,000－9,999元	Urban medical insurance	<30	yes	1_5	no	174	85kg	yes	yes	yes	unclear	yes	yes	no	unclear	≥6	quartic	≥3	no	yes	no	no	no	no	no	no	1
720	F	55	married	primary	unemployed	light-to-morderate activity	1,000－9,999元	Urban medical insurance	<30	yes	5－10	no	155	60kg	no	yes	unclear	unclear	yes	unclear	no	unclear	4－5	quartic	≥3	no	yes	yes	no	no	yes	yes	yes	0.75
721	M	39	married	secondary	employed	less activity	1,000－9,999元	Urban medical insurance	<30	no	<1	yes	176	80kg	no	no	unclear	unclear	no	no	no	unclear	1－2	quartic	1	Yes	no	yes	no	no	yes	no	yes	1
722	F	49	married	primary	unemployed	light-to-morderate activity	＜1,000元	Urban medical insurance	<30	yes	5－10	no	158	64kg	no	yes	unclear	unclear	yes	no	no	unclear	4－5	quartic	≥3	no	yes	yes	no	yes	yes	no	yes	0.75
723	M	75	married	secondary	unemployed	less activity	1,000－9,999元	Urban medical insurance	≥30	yes	5－10	no	173	80kg	no	no	no	unclear	yes	no	yes	unclear	4－5	quartic	≥3	no	yes	yes	no	no	yes	no	no	1
724	M	40	married	secondary	employed	less activity	1,000－9,999元	Urban medical insurance	<30	yes	1_5	no	171	91.5kg	no	yes	yes	unclear	yes	yes	yes	no	4－5	twice	≥3	no	yes	yes	no	no	yes	no	yes	0.75
725	M	60	married	secondary	employed	less activity	1,000－9,999元	Urban medical insurance	<30	yes	≥10	no	180	75kg	no	yes	yes	yes	yes	no	yes	unclear	3	quartic	0	yes	yes	no	no	no	no	no	yes	1
726	M	39	married	primary	employed	light-to-morderate activity	1,000－9,999元	Urban medical insurance	<30	yes	1_5	yes	173	65kg	no	no	no	unclear	no	no	no	unclear	3	quartic	2	no	yes	yes	yes	yes	yes	yes	yes	0.25
727	M	54	single	secondary	unemployed	less activity	1,000－9,999元	Urban medical insurance	<30	yes	1_5	yes	167	65kg	no	yes	no	unclear	no	yes	no	unclear	4－5	thrice	0	yes	yes	no	no	no	no	no	no	1
728	F	65	married	primary	unemployed	light-to-morderate activity	＜1,000元	Rural cooperative medical care	<30	yes	≥10	yes	160	54kg	no	yes	yes	yes	yes	yes	yes	yes	≥6	twice	≥3	no	yes	yes	yes	yes	yes	no	yes	0.5
729	F	46	married	primary	unemployed	light-to-morderate activity	＜1,000元	Urban medical insurance	<30	yes	5－10	yes	175	74kg	no	yes	no	no	yes	yes	no	no	3	twice	2	Yes	yes	no	yes	yes	yes	no	no	0.5
730	M	33	single	higher	employed	less activity	1,000－9,999元	Urban medical insurance	<30	yes	<1	no	175	90kg	no	no	unclear	yes	no	yes	no	yes	1－2	quartic	2	Yes	yes	yes	no	no	yes	no	yes	0.25
731	M	50	married	secondary	employed	less activity	1,000－9,999元	Urban medical insurance	<30	yes	≥10	yes	160	57kg	no	yes	yes	unclear	yes	no	no	unclear	1－2	thrice	0	Yes	yes	no	no	no	no	no	no	1
732	M	54	married	primary	unemployed	less activity	1,000－9,999元	Rural cooperative medical care	<30	yes	≥10	yes	175	63.3kg	no	no	no	no	yes	no	no	no	1－2	once	0	Yes	yes	no	no	no	no	no	no	1
733	F	57	married	secondary	unemployed	less activity	＜1,000元	Urban medical insurance	<30	yes	≥10	yes	163	63kg	no	yes	yes	unclear	no	unclear	unclear	unclear	3	quartic	2	Yes	yes	no	no	no	no	no	no	1
734	M	67	married	primary	unemployed	less activity	＜1,000元	Urban medical insurance	<30	yes	≥10	no	174	82kg	no	no	yes	yes	yes	no	yes	unclear	4－5	quartic	≥3	no	yes	yes	no	no	yes	no	yes	0.75
735	F	56	married	secondary	unemployed	less activity	1,000－9,999元	Urban medical insurance	<30	yes	≥10	yes	155	65kg	no	yes	no	no	yes	yes	yes	yes	≥6	quartic	≥3	no	yes	yes	no	no	yes	no	yes	1
736	M	66	married	secondary	employed	less activity	1,000－9,999元	Urban medical insurance	<30	yes	≥10	yes	178	82kg	no	no	yes	no	yes	no	yes	unclear	3	quartic	≥3	no	yes	yes	no	no	yes	no	no	1
737	M	48	married	secondary	employed	less activity	1,000－9,999元	Urban medical insurance	<30	yes	≥10	yes	163	78kg	no	yes	yes	yes	yes	no	no	unclear	3	quartic	1	Yes	no	yes	no	no	yes	no	no	1
738	F	70	married	primary	unemployed	less activity	＜1,000元	Rural cooperative medical care	≥30	yes	≥10	no	155	74kg	no	yes	unclear	unclear	yes	yes	yes	unclear	≥6	twice	≥3	no	yes	yes	no	no	yes	no	yes	0.75
739	M	48	married	secondary	employed	less activity	1,000－9,999元	Urban medical insurance	<30	yes	<1	no	172	75kg	no	no	yes	yes	yes	yes	no	unclear	4－5	quartic	≥3	no	no	yes	no	no	yes	no	no	1
740	M	53	married	primary	unemployed	light-to-morderate activity	＜1,000元	Urban medical insurance	<30	yes	<1	no	166	71kg	no	no	unclear	unclear	no	no	no	unclear	4－5	quartic	≥3	no	no	yes	no	no	yes	no	yes	0.75
741	F	72	married	primary	unemployed	less activity	＜1,000元	Rural cooperative medical care	≥30	yes	≥10	yes	155	75kg	no	yes	unclear	unclear	yes	yes	no	unclear	4－5	quartic	≥3	no	yes	yes	no	no	yes	no	yes	0.75
742	F	52	married	primary	unemployed	light-to-morderate activity	＜1,000元	Rural cooperative medical care	≥30	yes	5－10	no	160	56kg	yes	yes	yes	unclear	yes	no	yes	unclear	≥6	quartic	≥3	no	yes	yes	no	yes	yes	yes	yes	0.75
743	M	32	married	higher	employed	light-to-morderate activity	1,000－9,999元	Urban medical insurance	<30	yes	1_5	yes	180	80kg	no	yes	no	unclear	no	no	no	unclear	1－2	thrice	0	Yes	no	no	no	no	no	no	no	1
744	F	74	married	primary	unemployed	less activity	＜1,000元	Rural cooperative medical care	≥30	yes	≥10	no	160	70kg	no	yes	unclear	unclear	yes	yes	no	unclear	4－5	thrice	≥3	no	yes	yes	no	yes	yes	no	no	0.75
745	M	57	married	secondary	employed	less activity	1,000－9,999元	Urban medical insurance	<30	yes	1_5	no	170	65kg	no	no	no	no	no	no	no	no	1－2	twice	1	Yes	no	no	no	no	no	no	no	1
746	M	66	married	secondary	unemployed	less activity	1,000－9,999元	Urban medical insurance	<30	yes	≥10	no	167	73kg	no	yes	yes	no	no	yes	yes	no	3	thrice	≥3	no	yes	no	no	no	no	no	yes	1
747	F	67	single	primary	unemployed	less activity	1,000－9,999元	Urban medical insurance	<30	no	5－10	no	154	50kg	no	yes	unclear	unclear	no	yes	yes	no	1－2	thrice	1	Yes	yes	yes	no	no	no	no	no	0.75
748	M	46	married	primary	employed	light-to-morderate activity	1,000－9,999元	Urban medical insurance	<30	yes	5－10	yes	178	85Kg	yes	no	no	no	no	yes	no	yes	4－5	once	≥3	no	yes	no	no	no	no	no	no	0.75
749	M	45	married	secondary	employed	less activity	1,000－9,999元	Urban medical insurance	<30	yes	1_5	no	175	90kg	yes	unclear	no	unclear	no	yes	yes	no	≥6	twice	≥3	no	yes	yes	no	yes	yes	yes	yes	0.75
750	F	47	single	secondary	unemployed	light-to-morderate activity	1,000－9,999元	Urban medical insurance	≥30	yes	5－10	yes	168	63kg	no	no	no	no	no	yes	yes	no	3	once	1	Yes	no	yes	no	no	no	no	no	0.75
751	M	38	married	secondary	employed	light-to-morderate activity	1,000－9,999元	Urban medical insurance	≥30	yes	5－10	yes	173	74kg	no	unclear	unclear	unclear	no	yes	yes	yes	4－5	thrice	≥3	no	yes	yes	no	no	yes	no	yes	0.75
752	M	58	married	secondary	employed	less activity	1,000－9,999元	Urban medical insurance	<30	yes	5－10	yes	180	89kg	no	yes	unclear	unclear	no	yes	yes	yes	1－2	thrice	1	Yes	no	no	no	no	no	no	no	1
753	M	39	married	higher	employed	less activity	1,000－9,999元	Urban medical insurance	≥30	yes	1_5	no	180cm	101kg	no	no	no	no	no	yes	no	unclear	1－2	thrice	0	yes	no	yes	no	no	yes	no	no	0.75
