# Supplementary material for: Predicting population: development and validation of a new predictive nomogram for evaluating medication nonadherence risk in a type 2 diabetes
Source: PeerJ. 2022 Mar 15;10:e13102. doi: 10.7717/peerj.13102 (PMC8932313; doi:10.7717/peerj.13102)
Supplement: Supplemental Information 2 [file peerj-10-13102-s002.xlsx]

## Sheet: Sheet1
id	Status	sex	age	BMI	Marial-status	education	Employment	Working-strength	income	insurance	distance	Blood-glucose-meter	Disease-duration	family-history	Comorbidities	Complications	Types-of-pills-prescribed-daily	Types-of-hypoglycemic-pills-daily	Dosing-frequency-daily-of-hypoglycemic	Current-use-of-insulin	Current-use-of-GLP-1	Dosing-frequency-daily-of-hypoglycemic-agents-(pills, insulin, GLP-1)
1	0	0	1	3	0	0	0	0	1	0	0	0	1	1	1	1	3	2	3	1	1	0
2	0	0	1	2	1	0	0	1	1	0	1	0	2	0	1	1	0	1	1	1	1	0
3	1	0	1	2	0	0	1	1	1	1	1	0	1	1	1	0	0	1	3	1	1	0
4	1	0	2	2	1	0	1	1	1	1	0	1	1	1	1	1	0	1	3	1	1	0
5	0	1	1	3	0	0	1	0	0	1	1	0	1	0	1	2	0	3	0	1	1	0
6	0	1	2	3	0	0	1	0	0	1	0	0	3	0	2	2	2	1	3	0	0	3
7	1	0	1	1	0	0	1	1	1	1	1	0	1	0	1	1	0	0	2	1	0	0
8	0	1	2	3	0	0	1	0	0	1	0	0	3	0	2	2	2	1	3	0	1	3
9	1	0	1	0	0	0	1	2	0	1	0	0	0	1	1	1	1	0	0	1	1	1
10	0	1	2	1	1	0	1	0	0	0	1	0	3	0	1	1	0	0	2	0	1	2
11	1	1	1	1	0	0	1	0	1	2	0	0	2	0	1	1	0	1	0	1	1	0
12	0	0	1	2	0	1	0	0	1	0	1	0	1	0	0	0	0	0	1	1	1	0
13	0	1	1	2	1	1	0	0	1	0	1	1	0	1	0	0	0	3	0	1	1	0
14	0	0	1	1	0	0	0	1	0	1	1	0	0	1	1	2	0	0	1	1	1	1
15	0	0	0	1	1	1	0	0	1	1	0	0	1	0	2	2	0	3	0	0	0	1
16	1	0	0	1	0	0	0	2	1	0	0	1	2	1	1	0	0	0	1	1	1	1
17	1	0	2	1	0	0	0	1	0	2	0	1	1	0	1	1	0	0	1	1	1	1
18	1	0	2	2	0	0	1	0	1	1	0	0	0	0	1	1	0	0	3	1	1	0
19	0	1	2	1	0	0	1	0	1	1	0	0	0	0	0	1	0	0	3	0	1	3
20	0	1	1	3	0	0	1	0	0	1	1	0	0	1	0	0	0	1	3	1	1	0
21	0	1	2	1	0	1	1	0	1	0	1	0	0	1	1	0	0	0	3	0	1	1
22	1	0	1	2	0	1	1	0	1	1	1	0	2	1	1	1	1	1	3	0	1	1
23	1	1	2	2	0	0	1	0	1	0	1	0	3	0	1	2	3	1	3	0	1	3
24	0	0	1	1	0	1	0	0	1	0	1	0	0	0	0	0	0	0	3	0	1	1
25	1	0	1	2	0	1	0	0	1	0	1	0	0	0	0	0	0	0	0	1	1	0
26	0	1	1	1	0	0	1	0	1	0	1	0	2	1	0	0	0	3	0	0	1	3
27	0	0	0	2	0	1	0	0	1	0	0	0	1	0	1	0	0	1	3	1	1	0
28	0	1	0	3	1	0	1	0	1	1	0	1	0	1	0	0	0	0	3	1	1	1
29	0	0	1	2	0	1	0	0	1	0	0	0	2	1	1	1	0	0	3	1	1	3
30	0	0	1	2	0	1	0	0	1	0	1	0	1	1	0	0	0	0	1	1	1	0
31	0	0	1	1	0	0	0	0	1	1	1	0	0	1	0	0	0	0	1	1	1	0
32	0	0	1	2	0	2	0	0	1	0	1	0	3	0	0	2	1	2	1	0	1	1
33	1	0	0	2	0	0	0	1	1	1	0	0	1	1	1	1	0	1	3	1	1	0
34	1	1	1	1	0	0	0	0	1	0	0	0	1	0	1	1	0	1	3	1	1	0
35	1	0	1	1	0	1	1	0	1	0	0	0	2	1	1	2	0	1	3	0	1	3
36	1	0	1	1	0	0	1	1	1	1	1	0	1	1	0	0	0	3	0	0	1	3
37	0	1	0	3	0	0	1	0	1	1	1	0	0	0	0	0	2	2	3	1	1	0
38	0	0	2	1	0	0	1	0	1	0	0	0	3	0	1	2	2	0	1	0	1	2
39	0	0	0	1	0	0	1	0	1	1	0	0	0	1	0	0	0	1	3	1	1	0
40	1	0	1	2	0	1	0	0	1	0	1	0	2	0	1	1	2	1	3	1	0	0
41	1	0	2	2	0	0	1	2	1	1	0	0	3	0	1	2	3	1	2	0	1	3
42	0	0	1	2	0	1	1	0	1	0	1	0	3	0	2	2	0	0	2	0	1	3
43	0	1	1	2	0	0	1	0	0	1	1	0	1	1	1	2	0	0	2	0	1	3
44	5	0	2	2	0	0	1	1	0	1	1	1	2	1	1	2	2	0	2	1	1	0
45	1	1	0	3	0	0	1	0	0	2	0	0	3	0	1	1	0	3	0	0	1	3
46	0	1	0	1	0	1	1	0	0	2	0	0	3	1	1	1	0	3	0	0	1	3
47	0	0	2	2	0	1	1	0	1	0	1	0	3	0	1	0	1	1	3	0	1	2
48	1	0	2	1	0	0	1	0	1	0	1	0	1	1	2	1	0	3	0	1	1	0
49	0	0	2	2	0	1	1	1	1	0	1	0	3	1	1	1	0	3	0	0	1	3
50	5	0	2	1	0	1	1	0	1	0	1	0	3	0	0	1	0	0	2	0	1	2
51	0	1	2	1	0	1	1	0	1	0	1	0	0	0	1	1	0	3	0	0	1	3
52	0	0	2	2	0	0	1	0	1	1	1	0	3	0	0	0	0	0	1	0	1	1
53	1	0	1	2	0	1	0	0	1	0	1	0	2	1	0	1	0	1	3	0	1	1
54	0	1	0	3	0	0	1	0	1	1	1	0	3	0	0	0	0	0	0	0	1	3
55	1	0	2	2	0	0	1	0	0	0	1	0	3	0	1	2	0	0	1	0	1	3
56	0	1	1	1	0	2	0	0	1	0	1	0	1	0	1	1	1	2	3	0	1	1
57	1	1	1	1	0	1	1	0	1	0	0	0	3	0	1	0	1	1	3	0	1	3
58	1	0	1	2	0	1	0	0	1	0	0	0	3	0	1	1	2	0	3	0	1	3
59	1	0	1	3	0	1	0	1	2	0	1	0	3	0	2	2	2	1	3	0	1	3
60	0	0	1	2	0	1	0	0	1	0	0	0	3	0	1	1	3	3	0	0	1	0
61	1	0	1	1	0	1	0	0	1	0	1	0	2	0	0	1	0	0	1	0	1	1
62	1	0	1	2	0	1	0	1	1	0	0	0	2	1	1	2	0	1	2	1	1	0
63	0	0	0	0	0	1	0	0	1	0	1	0	0	0	1	1	0	0	1	1	0	0
64	0	1	2	1	0	0	1	0	2	0	1	1	2	0	2	2	3	1	3	0	1	1
65	1	0	1	3	0	0	0	0	2	0	1	0	3	0	2	1	3	2	3	0	1	1
66	1	0	2	1	0	0	1	0	1	0	0	0	3	1	0	2	2	0	3	1	1	0
67	0	1	2	2	0	0	1	0	0	0	0	0	3	1	1	1	2	1	3	0	1	2
68	0	1	0	1	0	0	1	1	0	0	1	0	3	0	1	1	1	3	0	0	1	3
69	1	0	1	2	0	0	1	0	0	1	0	0	3	1	1	1	2	0	3	1	1	0
70	1	0	1	3	0	1	0	0	1	0	1	0	2	1	1	2	0	0	3	1	1	0
71	0	1	2	2	0	0	1	0	1	1	1	0	1	1	1	1	0	0	3	0	1	1
72	1	1	1	2	0	0	1	0	1	0	1	0	3	1	0	1	0	1	3	1	1	0
73	1	0	1	3	0	1	0	0	1	0	0	1	2	1	0	0	0	1	3	1	1	0
74	1	1	2	2	0	0	1	1	1	0	0	0	2	0	2	1	3	1	3	0	1	3
75	1	1	1	2	0	0	1	0	1	1	0	0	2	1	1	1	1	2	3	0	1	1
76	1	1	2	1	0	0	1	1	1	0	1	1	1	1	1	2	2	0	3	0	1	1
77	1	0	1	1	0	0	1	1	1	1	0	0	0	1	1	2	0	0	2	1	1	0
78	1	1	1	2	0	1	1	0	1	0	1	0	1	0	1	0	0	0	3	1	1	0
79	1	0	1	2	0	1	0	0	1	0	1	0	0	1	1	0	0	0	3	1	1	0
80	0	0	2	2	0	0	1	0	0	1	0	0	2	1	2	1	0	3	0	0	1	0
81	1	1	2	1	0	0	1	0	0	1	1	0	2	0	0	0	0	0	3	0	1	3
82	1	1	2	2	0	0	1	0	1	0	0	0	1	0	1	1	2	1	3	0	1	2
83	0	0	2	1	0	1	0	0	1	0	0	0	1	0	1	1	1	0	3	0	1	2
84	0	1	2	1	0	1	1	0	0	1	0	0	2	1	1	2	0	3	0	0	1	3
85	0	1	0	2	0	1	0	0	1	1	0	0	0	1	0	0	3	2	3	1	1	0
86	0	1	2	1	0	0	1	0	0	1	0	1	0	1	1	1	0	3	0	0	1	0
87	0	0	2	1	0	1	1	1	1	0	1	0	2	1	2	1	2	0	1	0	1	1
88	0	0	1	2	0	0	0	0	1	0	1	0	1	0	2	1	0	3	1	0	1	2
89	0	0	0	2	0	1	0	0	1	0	1	0	0	1	1	0	0	0	3	1	1	0
90	1	0	2	1	0	1	1	1	1	0	1	0	3	0	1	2	3	0	2	0	1	3
91	0	0	2	1	0	0	1	0	0	1	1	1	0	1	1	2	2	0	3	1	1	0
92	1	1	2	3	0	0	1	0	1	1	1	0	3	1	1	1	1	0	1	0	1	1
93	0	1	2	3	0	0	1	1	0	1	1	1	3	1	1	1	3	0	2	0	1	1
94	1	0	1	3	0	1	1	0	1	0	1	0	3	0	1	1	2	1	3	0	1	1
95	1	1	1	1	0	0	1	2	1	1	0	0	0	1	0	0	1	1	3	0	1	1
96	1	1	2	2	0	0	1	0	0	1	0	1	2	0	2	2	3	0	3	1	1	0
97	0	0	2	3	0	0	1	2	1	0	0	0	1	1	2	1	2	3	0	1	1	0
98	1	0	1	3	1	0	1	0	1	1	1	0	1	0	1	1	1	0	2	0	0	2
99	0	0	2	2	0	1	1	0	1	0	1	0	3	0	1	1	2	1	3	0	1	2
100	1	1	2	0	0	0	1	0	0	1	0	0	3	1	2	1	2	0	3	0	1	3
101	1	1	2	1	0	0	1	0	0	1	1	0	3	0	2	1	2	1	2	0	1	3
102	1	0	2	0	0	1	1	2	2	1	0	0	1	1	1	1	2	0	3	1	1	0
103	0	0	2	1	0	1	1	1	2	0	1	0	3	1	1	1	2	3	0	1	1	0
104	0	1	2	2	0	0	1	0	0	1	0	0	1	1	1	2	2	0	1	1	1	0
105	1	0	2	3	0	0	1	0	1	0	0	0	1	1	1	1	1	0	3	1	1	0
106	1	1	2	1	0	0	1	0	1	0	1	0	3	0	2	2	1	0	1	0	1	2
107	0	0	1	1	0	1	0	0	1	0	1	0	3	0	1	1	1	3	0	1	1	0
108	0	1	2	1	0	0	1	0	1	0	0	0	3	0	1	2	3	1	2	0	1	1
109	0	0	1	2	0	1	0	0	2	0	1	0	2	0	1	1	1	1	3	0	0	1
110	1	0	1	3	0	1	0	0	2	0	1	0	3	1	2	1	3	0	3	1	1	0
111	0	1	2	2	0	0	1	0	0	1	1	0	3	1	2	1	0	0	3	0	1	2
112	0	0	1	2	0	1	0	0	1	0	1	1	2	1	2	1	0	3	0	1	1	0
113	0	0	2	3	0	1	1	0	1	0	0	0	3	0	1	1	1	3	0	0	1	2
114	1	0	2	2	0	0	1	0	0	0	1	0	3	0	1	1	3	0	3	0	1	3
115	0	0	2	2	0	1	1	0	1	0	1	0	3	1	2	1	0	0	2	0	1	3
116	0	1	2	3	0	0	1	0	0	1	0	0	1	1	2	1	0	0	2	1	1	0
117	1	0	2	1	0	0	1	2	1	1	0	0	2	0	2	1	3	0	3	0	0	2
118	1	0	1	2	0	0	1	0	2	1	0	0	3	1	0	1	0	0	1	0	0	1
119	1	0	1	1	0	1	0	0	1	0	1	0	3	0	1	2	3	0	2	0	1	3
120	0	1	2	3	0	1	1	0	1	0	1	0	1	0	1	1	2	2	3	0	1	3
121	1	1	1	2	0	0	1	2	0	1	0	0	3	1	1	1	1	0	3	0	1	2
122	1	1	1	2	0	1	1	2	1	0	1	0	3	1	2	1	0	1	3	0	1	3
123	0	1	2	1	0	0	1	0	1	0	1	0	3	0	1	2	0	0	3	0	1	3
124	0	0	2	2	0	0	1	0	0	0	0	1	3	1	2	1	2	0	3	0	1	1
125	0	0	1	3	0	0	1	1	1	1	0	0	3	1	1	1	0	0	3	0	0	1
126	1	1	1	2	0	0	1	1	0	0	0	0	1	0	1	1	0	0	3	1	1	0
127	1	0	1	2	0	1	1	0	1	0	1	0	2	1	1	2	1	1	2	1	1	0
128	1	0	1	3	0	0	0	0	1	0	1	0	1	1	1	1	0	0	3	0	0	1
129	1	0	1	2	0	1	0	1	1	0	0	0	2	1	0	0	0	0	3	1	1	0
130	1	1	2	1	0	0	1	2	1	0	1	0	3	1	2	0	2	3	0	1	1	0
131	0	1	1	2	0	0	1	1	1	0	0	0	2	0	2	1	2	2	3	0	1	3
132	0	1	2	1	0	0	1	2	0	0	1	0	3	0	1	1	0	3	0	0	1	3
133	0	0	1	2	0	0	0	0	1	0	1	0	3	1	1	1	2	0	1	0	1	2
134	1	0	2	2	0	1	1	0	0	0	1	0	2	1	1	1	2	0	3	0	0	1
135	1	0	1	2	0	1	1	0	0	1	0	0	1	0	1	1	2	1	3	0	1	1
136	1	0	2	1	0	0	1	1	1	0	1	0	0	0	2	1	3	2	3	0	1	2
137	0	1	2	1	0	0	1	0	0	1	0	0	0	1	1	1	2	3	0	0	1	3
138	0	0	2	1	0	0	0	2	1	0	0	0	3	0	1	1	1	3	0	0	1	2
139	1	0	1	2	0	0	0	1	1	0	1	0	2	1	1	1	0	1	3	1	1	1
140	1	0	2	3	0	0	1	0	1	0	1	0	3	1	1	1	0	0	3	0	1	2
141	0	0	2	0	0	1	1	0	1	1	1	0	0	1	0	1	2	1	3	0	1	3
142	1	0	0	2	0	0	0	0	1	0	1	0	0	1	1	0	2	1	2	1	1	0
143	1	0	0	2	0	0	0	0	1	0	0	0	0	1	1	0	2	1	3	1	1	0
144	1	1	2	3	0	0	1	0	0	0	1	0	1	1	1	0	1	0	1	0	1	3
145	1	0	1	2	0	1	0	0	1	0	1	0	2	0	1	1	0	0	3	0	1	1
146	0	0	2	3	0	0	1	0	1	0	1	0	2	0	2	2	2	1	3	0	1	3
147	0	1	0	3	0	0	1	0	1	1	1	0	1	1	0	0	0	0	3	0	1	1
148	0	0	0	1	0	0	0	1	1	1	1	0	0	1	0	0	0	1	3	1	1	0
149	1	0	2	3	0	0	1	0	1	0	1	0	0	0	1	1	3	1	2	0	1	1
150	1	1	2	1	0	0	1	0	1	0	1	0	2	0	2	2	2	1	3	0	1	2
151	1	1	1	1	0	0	0	0	1	0	1	0	2	1	0	1	0	3	0	0	1	3
152	1	1	1	1	0	0	1	0	1	1	0	0	2	0	1	1	1	1	3	0	1	3
153	1	1	2	2	0	0	0	0	1	0	1	0	1	0	1	1	2	2	3	1	1	3
154	1	0	1	1	0	1	0	0	1	0	1	0	0	0	0	0	0	0	1	0	1	2
155	1	1	1	1	0	1	0	0	1	0	0	0	2	0	1	0	0	1	3	0	1	1
156	1	0	1	1	1	0	0	1	1	1	1	0	2	0	1	1	0	1	2	0	1	2
157	1	0	1	2	0	0	1	0	1	1	1	0	0	1	1	0	0	3	0	0	1	1
158	0	1	1	1	0	1	0	0	1	0	1	0	2	1	0	0	0	3	0	0	1	3
159	1	1	1	1	0	0	1	0	1	0	1	0	3	1	1	1	0	3	0	0	1	2
160	1	1	2	2	0	0	1	0	1	0	1	0	2	0	2	1	2	1	3	0	1	3
161	1	1	1	2	0	0	1	2	1	1	0	0	0	0	1	0	0	1	3	0	1	1
162	0	1	1	3	0	0	1	2	1	1	0	0	0	1	0	0	0	0	3	0	1	2
163	1	0	0	2	0	1	1	1	1	1	1	0	2	0	1	0	2	2	3	1	1	0
164	1	0	1	1	0	0	0	0	1	1	1	0	0	1	1	0	0	1	3	0	1	1
165	0	0	2	2	0	0	1	0	1	1	0	0	3	0	2	2	0	0	1	0	1	2
166	0	1	1	1	0	0	1	0	1	1	1	0	0	1	1	0	3	0	3	0	1	3
167	1	1	1	2	0	0	1	0	1	0	0	0	0	0	1	2	0	0	3	0	1	2
168	0	0	1	2	0	1	0	1	1	0	1	0	2	1	1	1	0	3	0	1	1	0
169	1	1	1	3	0	2	0	0	1	0	1	0	2	1	1	2	0	0	3	1	0	0
170	0	0	2	2	0	0	0	0	1	0	1	0	3	0	1	1	0	3	0	0	1	2
171	0	0	1	2	0	1	0	2	1	0	1	0	1	0	2	1	3	1	3	1	1	0
172	0	0	2	2	0	1	1	0	1	0	1	0	3	1	1	1	2	1	3	0	1	1
173	1	1	2	2	0	0	1	1	0	0	1	0	1	1	2	2	0	0	3	1	1	0
174	1	0	0	2	0	1	0	0	2	0	1	0	3	1	1	1	0	0	3	0	1	3
175	1	0	0	2	0	1	0	0	1	0	0	0	1	1	1	1	1	1	2	1	1	0
176	0	0	1	3	0	1	1	0	0	0	1	0	1	0	2	1	3	1	3	1	1	0
177	0	0	1	2	0	2	0	0	1	0	1	0	3	1	2	2	3	2	3	0	1	1
178	1	0	0	3	0	1	0	0	2	0	1	0	1	0	1	1	0	0	2	1	1	0
179	1	0	2	1	0	0	1	2	1	1	0	0	3	0	1	1	3	1	2	0	1	2
180	0	0	1	1	0	1	0	1	1	0	1	0	2	0	1	1	0	0	3	1	1	0
181	1	0	2	2	0	1	1	0	1	0	1	0	2	0	1	1	2	1	2	1	1	0
182	0	1	0	1	0	2	0	0	1	0	1	0	2	1	0	0	0	3	0	0	1	3
183	0	0	0	2	1	0	1	0	0	1	0	1	0	0	0	0	0	0	3	0	1	3
184	1	1	1	1	0	0	0	1	1	0	0	0	3	1	2	2	1	0	3	0	1	1
185	1	0	1	1	0	1	0	1	1	0	0	0	2	1	1	2	0	1	3	0	1	1
186	1	1	2	1	0	0	1	1	0	0	0	0	3	0	1	1	1	0	3	0	1	2
187	1	1	1	2	0	1	0	1	1	0	1	0	3	0	1	2	3	1	2	0	0	1
188	1	0	1	3	0	1	0	0	1	0	1	0	0	0	1	2	2	1	3	1	1	0
189	1	0	2	3	0	1	1	0	1	0	1	0	3	0	1	2	3	2	3	0	1	1
190	0	0	1	2	0	1	0	0	1	0	1	0	3	0	1	2	2	0	3	0	1	3
191	1	0	1	2	0	1	0	0	1	0	1	0	2	1	1	2	3	1	3	1	1	0
192	1	1	2	3	0	1	1	0	1	0	1	0	3	1	1	1	3	0	1	0	0	2
193	1	0	1	1	0	1	0	2	1	0	1	0	1	0	1	1	2	1	3	1	1	0
194	5	0	1	3	0	0	1	1	1	0	1	0	3	1	1	1	1	1	3	0	1	1
195	0	0	1	3	0	1	0	1	1	0	1	0	1	1	1	1	2	0	2	0	1	1
196	0	1	1	2	0	1	0	0	1	0	1	0	3	0	1	1	2	0	3	0	0	1
197	0	0	1	2	0	1	1	1	1	0	1	0	1	1	1	1	0	3	0	0	1	1
198	1	1	0	3	1	1	0	0	1	0	1	0	1	1	1	1	1	0	3	1	1	0
199	1	0	1	2	0	1	0	1	1	0	0	0	3	1	1	1	1	3	0	0	1	3
200	1	1	2	2	0	0	1	1	0	0	1	0	2	0	1	1	3	0	1	0	1	3
201	1	1	2	3	0	1	1	0	1	0	1	0	3	0	1	1	1	0	3	0	0	1
202	1	0	2	3	0	0	1	0	0	0	0	0	2	1	1	1	3	1	3	1	0	0
203	1	1	2	2	0	1	1	0	1	0	0	0	2	0	1	1	2	0	1	0	1	2
204	0	0	1	3	0	1	0	1	1	0	1	0	1	1	1	2	3	2	3	0	1	1
205	1	1	1	2	0	0	1	1	1	0	1	0	2	1	2	1	2	1	3	1	1	0
206	1	0	0	2	0	1	0	0	1	0	1	1	0	0	1	2	0	0	3	1	1	0
207	1	1	1	2	0	0	1	1	0	0	1	0	2	1	1	1	2	0	3	0	1	1
208	1	0	2	2	0	1	1	0	1	0	0	0	2	1	1	1	2	2	3	1	1	0
209	1	0	1	3	0	1	0	0	1	0	1	0	1	1	1	2	2	1	2	1	1	0
210	0	0	2	1	0	1	0	0	1	0	1	0	3	1	1	2	1	0	3	0	0	1
211	1	0	0	1	0	0	0	1	1	0	1	0	1	0	1	1	1	1	3	1	1	0
212	0	0	2	1	0	1	1	0	1	0	1	0	1	0	1	1	2	3	0	0	0	1
213	1	1	2	1	0	0	1	1	0	1	1	0	3	0	2	2	3	2	2	0	1	2
214	1	1	1	2	0	0	1	1	0	0	1	0	2	0	1	1	1	1	2	1	1	0
215	1	0	0	3	1	1	0	0	1	0	1	0	0	1	1	1	0	1	3	1	1	0
216	0	0	1	1	0	1	0	0	1	0	1	0	3	0	1	2	0	3	0	0	1	3
217	0	0	1	1	0	0	1	0	1	1	1	0	3	0	0	1	0	3	0	0	1	3
218	0	1	1	1	0	1	1	0	0	0	1	0	3	0	2	1	1	1	3	0	1	3
219	1	0	2	2	0	0	1	0	0	0	1	0	3	1	1	2	2	1	3	0	1	3
220	1	1	2	2	0	1	1	0	1	0	1	0	3	0	2	1	3	1	3	0	1	1
221	1	0	2	2	0	1	0	0	1	0	1	0	3	0	1	1	1	1	3	0	1	2
222	1	0	1	3	0	1	0	0	1	0	1	0	3	0	1	2	1	0	3	1	1	0
223	1	1	2	3	0	0	1	0	0	1	0	0	3	1	1	1	3	1	2	0	1	3
224	1	0	1	2	0	1	0	0	1	0	1	0	0	1	1	2	2	0	3	1	1	0
225	1	0	1	2	0	0	1	1	0	0	1	0	0	1	1	1	2	0	3	1	1	0
226	1	1	2	3	0	0	1	0	0	1	0	0	3	0	1	1	2	0	3	0	1	1
227	1	1	1	1	0	0	1	1	0	1	0	0	2	1	1	2	3	1	3	0	1	1
228	0	0	0	2	0	1	0	1	1	0	1	0	1	0	1	1	0	3	0	0	1	2
229	1	1	2	2	0	0	1	0	0	1	0	0	3	1	1	1	2	0	3	0	1	3
230	0	0	1	1	0	1	0	0	1	0	1	0	1	1	0	0	0	0	2	1	1	0
231	0	0	2	2	0	1	1	0	1	0	1	0	3	1	1	1	1	2	3	0	0	1
232	1	1	2	1	0	0	1	0	1	0	1	0	2	1	1	1	0	0	3	1	1	0
233	0	0	1	2	0	0	0	1	1	0	1	0	2	0	2	0	2	1	1	0	1	1
234	1	0	1	3	0	1	0	0	1	0	1	0	1	1	2	1	3	1	2	1	1	0
235	1	1	1	1	0	1	1	1	1	0	0	0	2	0	1	0	1	0	2	1	1	0
236	1	0	0	2	0	1	0	1	1	0	0	0	2	0	2	2	2	2	3	1	1	0
237	0	0	1	2	0	1	0	0	1	0	1	0	2	0	2	1	0	0	3	1	1	0
238	1	0	0	3	0	2	0	0	1	0	1	0	1	1	1	0	0	0	3	1	0	0
239	1	0	1	2	0	0	1	1	1	0	1	1	0	1	2	1	0	0	1	1	0	2
240	0	1	1	1	0	1	0	0	1	0	1	0	1	1	0	2	0	0	2	0	1	4
241	1	0	1	2	0	1	0	0	1	0	1	0	1	1	0	1	2	1	2	0	1	4
242	1	0	2	2	0	2	0	0	1	0	1	0	2	0	1	1	0	0	1	1	1	0
243	1	0	1	2	0	0	1	1	0	1	0	0	1	0	1	0	1	1	1	1	1	0
244	0	1	1	1	0	0	1	0	1	0	1	0	1	0	1	0	0	1	1	1	1	0
245	1	1	0	2	0	2	0	0	1	0	1	0	0	0	1	0	0	0	2	1	1	1
246	1	0	0	1	0	2	0	1	2	0	1	0	0	0	0	0	0	0	1	1	0	0
247	1	1	2	1	0	1	1	0	1	0	1	0	1	1	1	1	2	0	2	1	1	0
248	1	0	2	2	0	1	1	0	1	0	1	0	2	1	1	1	1	0	0	1	1	0
249	1	0	0	1	0	1	0	0	1	0	1	0	2	1	1	0	1	0	0	1	1	0
250	1	0	2	1	0	0	0	0	1	0	1	0	2	0	2	1	0	0	2	0	1	3
251	1	1	2	1	0	0	1	0	0	1	1	0	1	1	1	2	2	1	1	0	1	2
252	1	0	1	2	0	1	0	0	1	0	1	0	2	1	1	1	1	2	2	1	1	0
253	1	1	2	1	0	0	1	0	1	1	1	1	1	0	1	1	0	0	0	0	1	1
254	1	0	1	2	0	1	0	1	1	0	1	1	0	1	2	0	0	1	1	0	1	4
255	1	0	2	1	0	0	1	0	0	1	1	0	1	1	1	1	0	1	1	0	1	4
256	1	0	2	1	0	0	1	0	1	0	1	0	2	1	1	1	0	1	1	1	1	0
257	1	0	2	1	0	1	1	0	1	0	1	1	1	1	1	0	0	0	1	1	0	0
258	0	0	1	1	0	1	0	0	1	0	1	0	0	1	1	1	0	1	1	0	1	4
259	0	0	1	2	0	1	0	1	1	0	1	0	0	0	1	1	0	1	2	1	1	0
260	1	0	2	0	0	0	1	0	1	0	1	0	1	1	1	2	0	0	2	0	1	1
261	1	0	2	2	0	0	1	0	1	0	1	1	1	0	0	1	0	1	1	0	1	1
262	1	0	2	2	0	1	1	0	1	0	1	0	1	1	1	1	0	0	0	1	1	0
263	0	0	2	1	0	1	1	0	1	0	1	0	2	0	1	1	0	0	2	0	1	3
264	1	1	2	2	0	0	1	0	1	0	1	0	1	1	1	2	0	2	0	0	0	1
265	1	1	2	2	0	1	1	0	1	0	1	1	2	1	1	1	0	1	2	0	1	1
266	1	1	1	2	0	1	1	0	1	1	1	0	1	0	1	1	0	0	2	0	1	3
267	1	0	2	2	0	1	1	0	1	0	1	0	2	0	1	2	0	0	0	1	1	0
268	0	0	1	2	0	1	0	0	1	0	1	1	0	1	1	0	0	1	1	0	1	4
269	1	0	1	2	0	1	0	1	1	0	1	0	2	1	1	1	0	0	2	1	1	0
270	1	1	2	1	0	0	1	0	0	1	1	0	2	1	1	2	0	0	0	0	1	2
271	0	1	2	2	0	1	1	0	1	0	1	0	0	0	2	1	0	0	2	0	1	4
272	1	0	1	1	0	1	0	0	1	0	1	0	2	1	0	1	0	0	2	0	1	1
273	1	0	2	2	0	0	1	0	0	0	1	0	1	1	2	2	0	0	0	0	1	3
274	1	0	2	1	0	0	1	0	0	0	1	1	1	1	2	1	0	2	2	1	1	0
275	1	1	1	1	0	0	1	0	0	1	1	0	0	1	0	0	0	1	1	1	1	0
276	1	0	2	2	0	1	1	0	1	0	1	0	1	1	0	2	0	0	2	0	1	2
277	1	0	1	1	0	0	1	1	0	1	1	0	1	1	0	1	0	0	1	0	0	1
278	1	0	1	2	0	0	1	0	1	1	1	0	2	0	1	1	1	2	2	1	1	0
279	0	1	2	1	0	1	1	0	1	0	1	0	1	0	2	1	0	0	2	0	0	1
280	1	1	2	1	0	1	1	0	1	0	1	0	1	1	0	1	0	0	2	1	1	0
281	0	0	2	2	0	1	1	0	1	0	1	0	1	1	2	1	0	1	2	1	1	0
282	0	0	1	1	0	1	0	1	1	2	1	0	1	1	1	1	0	0	2	0	1	1
283	1	0	0	1	0	1	0	0	1	0	1	0	0	1	0	1	1	2	1	0	1	1
284	0	0	2	2	0	0	1	0	0	1	1	1	0	0	1	2	0	0	2	1	0	0
285	1	1	1	2	0	0	1	0	1	0	1	0	1	1	2	1	0	1	1	1	1	0
286	1	0	0	2	0	0	0	1	1	1	1	0	1	1	0	0	0	1	2	1	1	0
287	0	0	0	1	0	0	0	1	1	0	1	1	0	1	0	1	0	1	1	0	1	4
288	1	0	2	2	0	0	1	0	0	0	1	0	1	0	0	2	0	1	1	0	1	4
289	1	0	2	2	0	0	1	0	1	0	1	1	0	0	0	0	0	1	1	0	1	4
290	0	0	1	1	0	1	0	0	1	0	1	0	0	0	1	1	1	2	2	1	1	0
291	1	0	1	2	0	1	0	1	2	0	1	0	1	1	2	1	0	0	0	0	1	1
292	1	1	2	2	0	1	1	0	1	0	1	0	1	1	1	1	0	0	0	0	1	1
293	0	1	1	1	0	1	0	0	2	0	1	0	0	1	1	1	0	1	1	0	1	1
294	1	1	1	1	0	1	1	0	1	0	1	0	0	1	1	0	0	1	1	0	1	4
295	1	1	2	2	0	1	1	0	1	0	1	0	1	0	1	2	0	1	2	0	1	4
296	1	1	2	0	0	0	1	0	0	1	1	0	1	0	1	1	0	1	1	0	1	4
297	1	0	2	2	0	0	1	0	0	1	1	0	2	0	1	1	0	0	0	0	1	4
298	1	1	1	1	0	0	1	0	0	1	1	0	2	1	0	1	0	1	1	0	1	4
299	1	1	1	2	1	0	1	0	0	0	1	0	2	0	1	1	1	2	2	0	1	1
300	1	1	2	0	0	1	1	0	1	0	1	0	1	1	1	1	0	0	2	1	1	0
301	1	1	2	2	0	0	1	0	0	1	1	0	1	1	1	1	0	0	2	0	0	1
302	0	0	1	1	0	1	0	0	1	0	1	0	0	0	1	1	0	0	2	0	1	4
303	1	0	1	1	0	1	0	0	2	0	1	0	1	0	1	1	1	2	2	1	1	0
304	1	0	1	1	0	1	0	1	1	0	1	0	1	1	1	1	0	1	1	0	1	1
305	1	0	2	1	0	1	1	0	1	0	1	0	1	0	1	1	0	0	2	0	1	1
306	1	1	2	1	0	0	1	0	1	0	1	0	1	0	1	1	0	0	1	0	1	4
307	1	0	1	1	0	1	0	0	1	0	1	0	0	0	1	1	0	1	1	0	1	4
308	1	0	2	2	0	1	1	0	1	0	1	0	1	0	1	2	0	1	0	1	1	0
309	1	1	2	1	0	0	1	0	1	1	1	0	1	0	0	1	0	0	2	1	1	1
310	1	0	1	2	0	1	0	1	1	0	1	0	1	1	1	2	0	1	2	0	1	1
311	1	1	2	1	0	0	1	0	1	1	1	0	1	0	0	1	0	0	2	1	1	0
312	1	0	2	1	0	1	1	0	1	0	1	0	2	0	2	0	0	0	2	0	1	1
313	1	0	0	1	0	0	0	1	1	2	1	0	1	1	0	0	0	1	1	0	1	4
314	1	0	1	2	0	1	1	0	1	0	1	0	2	1	2	1	0	1	1	0	1	1
315	0	0	1	1	0	1	0	0	1	0	1	1	0	1	0	1	0	1	1	0	1	1
316	1	1	1	1	0	0	1	0	1	0	1	0	0	1	1	1	0	0	2	1	0	0
317	1	1	2	1	0	0	1	0	1	1	1	0	2	1	2	1	1	2	2	1	1	0
318	1	0	2	2	0	1	1	0	1	0	1	0	1	1	1	2	0	1	1	1	1	0
319	1	0	1	1	0	1	0	1	2	0	1	0	1	1	1	2	0	1	2	0	1	1
320	1	1	1	1	0	1	1	0	1	0	1	0	1	1	1	1	0	1	1	0	0	1
321	0	0	1	2	0	1	0	1	1	0	1	0	1	1	1	2	0	1	1	1	1	0
322	1	1	1	1	0	0	1	0	1	1	1	0	1	0	1	2	1	2	2	1	1	0
323	1	0	1	1	0	0	0	1	1	0	1	0	1	0	0	1	0	1	2	1	1	0
324	1	1	2	2	0	0	1	0	1	0	1	0	1	1	1	1	0	0	2	0	1	1
325	0	0	2	2	0	1	1	0	1	0	1	0	1	0	1	1	0	0	0	0	1	4
326	1	1	2	2	0	0	1	0	0	1	0	1	0	1	1	0	0	1	1	0	1	2
327	1	1	1	2	0	1	1	0	1	0	1	0	2	1	1	2	0	0	2	0	1	1
328	1	0	1	1	0	1	0	1	1	0	1	0	2	1	1	2	0	1	1	0	1	1
329	1	0	2	2	0	1	1	0	1	0	1	0	1	0	0	2	0	1	1	1	1	0
330	1	0	1	1	0	0	0	1	1	1	1	0	2	0	1	1	0	0	0	0	1	2
331	1	0	2	2	0	1	1	0	2	2	1	0	1	1	1	1	0	1	1	0	0	1
332	1	1	1	1	0	0	1	0	0	1	1	1	0	1	1	1	0	1	2	0	1	1
333	1	0	1	2	0	1	1	0	0	1	1	0	1	1	1	1	0	1	2	0	1	1
334	0	0	1	2	0	1	0	1	1	0	1	0	1	1	1	2	0	1	1	0	1	4
335	1	0	1	2	0	1	0	1	1	0	1	1	0	1	2	2	0	0	2	1	1	0
336	0	1	1	2	0	1	0	1	1	0	1	0	2	1	0	1	0	0	2	0	1	1
337	1	0	1	1	0	1	0	1	1	0	1	0	2	1	1	1	1	2	2	0	1	1
338	1	0	1	2	0	0	0	1	1	0	1	0	0	1	1	1	0	1	1	1	1	0
339	0	1	0	1	1	1	0	1	1	0	1	0	1	1	1	0	0	0	2	1	0	0
340	0	0	1	1	0	1	0	0	1	0	1	0	2	1	1	1	0	1	2	1	1	0
341	1	0	2	2	0	1	1	0	1	0	1	0	1	1	1	2	0	1	1	0	0	1
342	1	1	1	1	0	1	1	0	1	0	1	0	1	0	1	1	0	1	1	0	1	4
343	1	1	1	1	1	0	1	0	0	1	1	0	1	1	1	1	0	1	1	0	1	3
344	1	0	2	2	0	1	1	0	1	0	1	0	1	1	1	2	0	1	1	0	1	4
345	1	1	2	2	1	1	1	0	1	0	1	1	0	1	1	1	0	1	1	0	1	1
346	1	0	1	1	0	1	0	1	1	0	1	0	1	1	1	1	0	1	2	0	1	4
347	1	1	0	2	0	1	0	1	1	0	1	0	1	0	1	2	0	1	2	0	1	1
348	0	0	2	2	0	1	0	0	1	0	1	0	1	1	1	2	0	0	2	0	1	4
349	1	0	0	1	0	1	0	0	1	1	1	1	0	0	1	1	0	1	1	0	1	4
350	1	0	2	2	0	0	0	1	1	1	1	0	2	0	1	0	0	0	0	0	1	2
351	1	0	1	2	0	1	0	0	1	0	1	1	0	0	0	0	0	1	1	0	1	4
352	1	1	2	2	0	0	1	0	0	1	1	0	1	0	1	1	0	1	1	0	1	2
353	0	1	2	1	0	0	0	0	0	1	0	1	0	0	2	0	0	1	1	0	1	4
354	1	1	1	2	0	0	1	0	1	0	1	0	1	0	1	1	1	2	1	1	1	0
355	1	0	2	2	0	1	1	1	1	0	1	0	1	1	1	1	0	1	1	0	1	2
356	1	0	1	1	0	0	0	0	1	0	1	0	1	0	2	2	0	1	1	0	1	4
357	1	0	1	1	0	1	0	1	1	0	1	0	0	0	1	1	1	2	2	0	1	4
358	1	1	1	1	0	1	0	1	1	0	1	0	2	1	1	1	0	1	1	0	1	4
359	1	0	1	2	0	1	0	0	1	0	1	0	2	0	0	1	0	1	2	1	0	0
360	1	0	2	1	0	1	1	0	1	0	1	0	1	1	0	1	1	2	2	0	1	1
361	1	0	1	2	0	1	0	1	2	0	1	0	1	1	0	1	0	0	2	0	1	4
362	1	1	1	1	0	0	1	0	1	0	1	0	0	1	1	2	0	0	0	1	1	0
363	1	0	1	1	0	0	0	1	1	2	1	0	1	0	0	1	0	1	1	0	1	4
364	1	0	1	1	0	1	1	0	1	0	1	0	2	0	0	1	0	0	2	0	1	4
365	1	1	2	2	0	1	1	0	1	0	1	0	1	0	2	2	0	0	2	0	0	1
366	1	0	1	1	0	1	0	0	1	0	1	0	1	0	1	1	1	2	2	1	1	0
367	1	0	2	1	0	1	1	0	1	0	1	0	1	1	2	2	0	0	2	0	1	1
368	1	0	2	1	0	1	1	0	1	0	1	0	1	1	1	1	0	0	2	1	0	0
369	1	1	0	1	1	1	1	1	0	2	1	0	1	0	1	0	0	1	1	0	1	4
370	1	0	1	1	0	2	0	1	2	0	1	0	1	0	1	0	1	2	2	1	1	0
371	1	0	2	2	0	1	0	1	1	2	1	0	1	1	1	2	0	1	1	0	1	2
372	1	0	1	2	0	0	0	1	1	1	1	0	2	1	0	1	0	1	1	0	1	4
373	1	1	2	1	0	0	1	0	0	1	0	0	2	1	0	1	0	0	2	0	1	4
374	1	1	2	2	0	1	1	0	1	0	1	0	1	0	0	1	0	1	1	0	1	4
375	1	0	1	1	0	1	0	1	1	0	1	0	2	1	1	1	0	1	1	0	1	1
376	1	0	2	1	0	0	1	2	1	1	1	1	1	1	0	1	0	1	1	0	1	4
377	1	0	1	1	0	0	0	2	1	1	1	0	0	0	0	1	0	0	1	1	1	0
378	1	1	2	2	0	1	1	0	1	0	1	0	1	0	1	2	0	0	2	0	0	1
379	1	0	1	1	0	1	0	1	1	0	1	1	1	1	1	1	0	0	0	1	1	0
380	0	0	0	1	0	1	0	1	1	0	1	1	0	1	1	0	0	0	2	1	1	0
381	1	0	1	2	0	1	0	1	1	0	0	1	1	1	1	1	0	0	0	1	1	0
382	1	0	1	2	0	1	0	0	1	0	1	0	2	1	1	1	0	0	2	0	1	1
383	1	1	2	2	0	0	1	0	1	0	1	0	2	1	1	2	0	1	1	0	1	1
384	1	0	2	1	0	1	1	0	1	0	1	0	2	0	1	1	0	1	1	0	1	1
385	1	0	2	1	0	1	1	0	1	0	1	1	0	0	1	1	0	0	2	0	1	1
386	1	0	0	1	0	0	0	2	1	1	1	0	1	0	2	0	0	1	2	0	1	1
387	0	0	2	2	0	1	1	0	1	0	1	0	1	1	1	1	0	1	1	0	1	4
388	1	0	1	1	1	1	1	1	1	1	1	0	2	1	1	2	0	0	2	0	1	4
389	1	1	1	2	0	0	1	0	1	0	1	0	1	1	2	1	0	1	2	0	1	1
390	1	1	2	1	0	0	1	0	1	0	1	0	1	0	2	1	0	0	2	0	1	4
391	1	0	2	2	0	1	1	0	1	0	1	0	1	1	0	1	0	0	0	0	1	2
392	1	1	2	1	0	0	1	0	1	0	1	1	0	1	1	1	0	1	1	1	1	0
393	1	1	1	2	0	1	1	0	0	1	1	0	2	1	1	1	0	0	0	0	1	1
394	1	1	1	1	1	0	1	0	1	0	1	0	1	1	0	1	1	2	2	1	1	0
395	1	0	2	2	0	1	1	0	1	0	1	0	1	0	0	2	0	1	1	0	0	3
396	1	0	1	2	0	1	0	1	1	0	1	0	1	0	0	1	0	0	2	0	1	1
397	1	1	1	1	0	1	1	0	1	0	1	0	2	1	1	2	0	0	2	1	0	0
398	1	1	1	1	0	1	1	0	1	0	1	0	1	1	0	2	0	0	2	0	1	4
399	1	0	2	2	0	1	1	0	1	0	1	0	1	1	1	1	0	0	2	0	1	4
400	1	1	2	2	0	1	1	0	1	0	1	0	1	1	1	1	0	1	2	1	1	0
401	1	0	1	2	0	1	0	1	1	0	1	0	2	1	2	1	0	1	2	0	1	1
402	0	0	1	2	0	1	0	1	1	2	1	1	0	1	1	1	0	1	2	0	1	1
403	0	0	2	1	0	0	1	0	0	1	1	0	1	1	2	2	0	1	1	0	1	4
404	1	0	0	2	0	1	0	0	1	0	1	0	2	1	0	1	0	0	2	0	1	1
405	1	0	1	1	0	1	0	0	1	0	1	1	0	0	2	0	0	1	1	0	1	4
406	1	1	2	1	0	0	1	0	1	1	1	0	1	0	1	2	0	1	2	0	1	1
407	1	0	2	2	0	1	1	0	1	0	1	0	2	0	1	1	0	1	1	0	1	1
408	0	0	2	1	1	1	1	0	1	0	1	0	1	1	1	2	0	1	1	0	1	2
409	1	0	1	1	0	1	1	1	1	0	1	1	0	1	1	1	0	1	1	1	1	4
410	1	0	2	2	0	0	1	1	1	1	1	0	2	0	1	1	0	1	2	0	1	1
411	0	1	2	2	0	0	1	0	1	1	1	0	1	1	1	2	0	0	2	0	1	4
412	1	1	2	2	0	1	1	0	1	0	1	0	2	1	1	1	0	1	0	0	1	1
413	1	1	2	2	0	0	1	0	1	0	1	0	2	0	1	1	0	0	0	0	1	4
414	0	1	2	2	0	0	1	0	1	0	1	0	1	1	1	1	1	2	0	0	1	2
415	1	0	2	2	0	0	1	0	1	0	1	0	2	1	2	1	0	0	2	1	1	0
416	1	1	2	2	0	0	1	0	0	1	1	0	1	1	1	1	0	1	2	0	1	1
417	1	1	2	2	0	1	1	0	1	0	1	0	1	0	2	1	0	0	0	0	1	1
418	1	1	1	1	0	1	1	0	1	0	1	0	0	1	1	1	0	1	1	0	1	4
419	0	1	2	1	0	0	1	0	1	0	1	0	1	0	1	1	0	0	2	0	1	2
420	1	0	1	2	0	1	0	0	1	0	0	0	1	1	1	2	0	0	2	1	1	0
421	0	1	1	2	0	1	1	0	1	0	1	0	1	0	1	1	0	0	2	0	1	2
422	1	1	2	1	0	0	1	0	1	0	1	0	0	1	1	1	1	1	1	1	1	0
423	1	1	2	1	0	1	1	0	1	0	1	0	1	1	2	2	2	2	2	1	1	0
424	1	1	2	1	1	0	1	0	1	1	1	0	1	1	1	2	1	1	2	1	1	0
425	1	0	1	1	0	1	0	1	1	0	1	0	1	0	2	2	2	1	1	0	1	1
426	1	1	1	2	0	1	0	1	1	0	1	0	0	0	0	1	0	1	2	1	1	0
427	1	1	1	2	0	1	1	0	1	0	1	0	1	1	0	2	1	1	2	0	1	1
428	1	1	2	2	0	0	1	0	1	0	1	0	1	0	2	2	1	1	1	0	1	2
429	1	0	1	1	0	0	1	1	1	1	1	0	1	1	1	2	1	1	1	0	1	4
430	1	1	2	2	1	1	1	0	1	1	1	0	1	1	1	1	2	1	2	1	1	0
431	1	1	2	1	0	0	1	0	1	0	1	0	1	1	2	2	0	1	2	0	1	1
432	1	0	0	2	0	1	0	1	1	0	1	0	1	1	1	1	0	1	1	1	1	0
433	1	0	2	2	0	1	1	0	1	0	1	0	1	0	1	2	2	1	1	0	1	4
434	1	0	1	2	0	1	0	0	1	0	1	0	1	1	1	1	1	1	1	0	1	2
435	0	0	2	1	0	1	1	0	1	0	1	0	1	1	2	2	1	1	1	0	1	3
436	1	0	1	2	0	1	1	0	1	0	1	0	2	1	1	2	2	1	2	1	1	0
437	1	0	2	1	0	0	1	2	1	1	1	0	2	1	0	0	1	0	2	1	1	0
438	1	1	1	1	0	1	1	0	1	0	1	0	2	1	0	1	0	1	1	0	1	4
439	1	0	1	2	0	1	0	1	1	0	1	0	2	1	1	1	1	0	2	0	1	1
440	1	0	0	1	0	1	0	1	1	1	1	1	0	0	1	1	2	1	2	0	1	4
441	1	1	2	2	0	1	1	0	1	0	1	0	1	0	1	1	0	0	2	0	1	2
442	1	1	2	2	0	0	1	0	1	0	1	0	2	1	1	1	1	1	1	0	1	1
443	1	1	2	0	0	1	0	1	1	1	0	0	1	1	2	2	2	1	1	0	1	4
444	1	0	1	1	0	0	1	0	1	1	1	0	0	1	1	0	1	1	1	0	1	4
445	1	0	1	2	0	1	0	1	1	0	1	0	2	0	1	1	2	1	1	1	1	0
446	1	0	1	2	0	1	0	1	2	0	1	0	1	0	1	1	0	0	2	0	1	2
447	0	0	1	1	0	1	0	1	1	0	1	0	1	0	2	1	1	1	1	0	0	1
448	1	0	1	1	0	1	0	1	1	0	1	0	1	0	2	2	1	0	1	0	1	2
449	1	1	2	1	0	1	1	0	1	0	1	0	1	0	2	1	1	0	0	0	1	1
450	1	1	1	1	0	0	1	2	1	1	1	0	1	0	0	1	0	1	2	0	1	4
451	1	0	1	1	0	1	0	1	1	0	1	0	2	1	0	1	1	1	2	1	1	0
452	1	1	2	2	0	1	1	0	1	0	1	1	0	1	1	0	1	1	2	1	1	0
453	1	0	1	1	0	1	0	0	1	0	1	0	1	0	1	1	1	0	2	1	1	0
454	1	0	2	1	0	0	1	0	1	0	1	0	1	1	1	1	2	1	2	0	1	1
455	1	1	2	2	0	0	1	0	0	1	1	0	2	1	1	2	0	0	2	0	1	4
456	0	0	2	2	0	0	1	0	0	1	1	0	1	0	1	1	1	1	2	0	1	1
457	0	1	1	2	0	1	0	1	1	0	1	0	1	0	1	1	0	0	2	1	1	0
458	1	1	1	1	0	1	1	0	1	0	1	0	2	0	0	1	0	0	1	0	1	1
459	1	1	2	1	0	1	1	0	1	0	1	0	1	0	1	2	1	0	2	0	1	2
460	1	0	1	2	0	1	0	0	1	0	1	0	1	1	1	1	1	1	1	0	1	2
461	1	0	2	1	0	1	1	0	1	0	1	0	1	1	1	2	2	2	2	0	1	2
462	1	0	2	1	0	0	1	0	0	1	1	0	1	1	1	1	0	0	2	1	1	0
463	1	0	0	2	0	1	0	1	1	0	1	0	0	1	1	0	0	0	0	1	1	0
464	1	0	1	2	1	1	0	1	1	0	1	0	1	1	0	1	0	0	0	0	1	4
465	1	0	0	2	0	1	0	2	1	1	1	0	2	1	1	1	1	2	2	1	1	0
466	1	1	2	2	0	0	1	1	0	1	1	1	0	1	1	1	0	0	2	1	1	0
467	0	0	2	1	0	1	1	0	1	0	1	0	1	1	0	0	0	0	1	0	1	1
468	1	1	2	2	0	0	1	0	1	0	1	0	1	1	0	1	0	0	2	1	1	0
469	1	1	1	2	0	1	1	0	1	0	1	0	2	1	0	1	1	2	1	1	1	0
470	1	0	1	1	0	1	0	1	1	0	1	0	0	1	1	1	0	0	2	0	1	4
471	1	0	1	1	0	1	0	0	1	0	1	0	1	0	1	1	0	1	2	1	1	0
472	1	0	1	1	0	0	1	0	0	1	1	0	1	1	1	1	1	0	2	0	1	1
473	0	1	1	1	0	0	1	0	0	1	1	0	1	1	1	1	1	1	1	0	1	4
474	0	0	1	2	0	1	0	1	1	0	1	1	0	1	0	1	0	0	2	0	1	1
475	1	0	2	1	0	1	1	0	1	0	1	1	0	1	0	0	0	1	1	1	0	0
476	0	1	2	1	0	0	1	0	1	0	1	0	2	0	1	1	1	1	2	0	1	2
477	1	0	2	2	0	1	1	0	1	0	1	0	1	0	1	1	0	1	1	0	1	1
478	0	0	0	1	1	1	0	0	1	2	1	0	0	1	0	1	0	0	1	0	1	4
479	1	0	1	1	0	1	0	0	1	0	1	0	2	1	1	1	0	0	2	1	1	0
480	1	1	1	1	0	0	1	0	0	1	1	1	0	0	1	0	1	0	2	1	1	0
481	1	0	2	1	0	1	1	0	1	0	1	0	1	1	0	1	0	1	1	0	1	4
482	1	0	1	2	0	1	0	0	1	1	1	0	1	1	1	1	1	1	0	1	1	0
483	1	0	1	2	0	1	0	1	1	0	1	0	1	1	1	1	0	0	1	1	1	0
484	1	1	1	2	0	1	1	0	1	0	1	0	1	0	2	1	0	0	2	0	1	1
485	1	1	1	1	0	1	1	0	1	0	1	0	1	0	1	1	0	0	2	1	1	0
486	1	0	2	2	0	1	1	0	1	0	1	0	1	1	1	1	1	0	1	1	1	0
487	1	1	2	1	0	0	1	0	0	1	1	0	1	0	1	2	2	0	0	0	1	2
488	1	1	2	2	0	0	1	0	0	1	1	0	1	1	1	2	1	1	0	0	1	4
489	1	0	1	1	0	1	0	1	1	0	1	0	2	1	2	2	2	2	2	1	1	0
490	0	0	2	2	0	1	1	0	1	0	1	0	1	0	1	2	1	1	2	0	1	2
491	1	0	1	1	0	0	1	0	1	0	1	0	1	1	1	2	2	2	2	1	0	0
492	0	0	1	1	0	1	0	1	1	0	1	0	1	0	2	1	0	0	1	0	1	1
493	1	1	2	1	1	1	1	0	1	0	1	0	1	1	1	1	2	0	1	0	1	2
494	0	0	2	1	0	1	1	0	1	0	1	0	1	0	0	1	0	1	1	0	1	2
495	0	0	1	2	0	1	0	1	2	0	1	0	1	0	0	1	0	0	0	1	1	0
496	1	0	1	2	0	1	0	0	1	0	1	0	1	0	1	1	0	1	1	0	1	2
497	1	0	2	2	0	1	1	0	1	0	1	0	0	1	1	1	0	0	2	1	1	0
498	1	0	1	2	0	1	0	0	1	0	1	0	2	1	1	1	1	1	2	0	1	1
499	0	1	2	2	0	0	1	0	1	0	1	0	1	1	2	2	1	1	2	0	1	2
500	1	1	2	2	0	1	0	1	1	0	1	0	1	0	0	1	0	0	2	1	1	0
501	1	0	2	1	0	2	1	0	1	0	1	0	2	1	2	2	2	1	1	1	1	0
502	1	0	2	2	0	1	1	0	1	0	1	0	1	1	1	2	1	0	2	0	1	1
503	1	1	2	1	0	1	1	0	1	0	1	0	2	0	1	1	1	0	2	0	1	2
504	1	1	1	1	0	1	1	1	1	1	0	0	0	1	0	1	2	1	1	0	1	4
505	1	0	2	1	0	1	1	0	1	0	0	0	2	1	0	2	0	0	1	0	1	1
506	1	0	2	2	0	1	1	0	1	0	1	0	1	0	1	2	2	0	2	0	1	4
507	0	0	2	1	0	1	1	0	1	0	1	0	1	1	1	1	0	1	1	0	0	1
508	1	0	1	2	0	1	0	0	1	0	1	0	1	1	1	0	0	1	1	0	1	4
509	1	0	0	1	0	1	0	1	1	0	0	0	0	1	1	0	0	0	0	1	1	0
510	1	1	1	1	0	0	0	1	1	1	1	0	1	0	1	1	1	2	2	1	1	0
511	1	1	2	2	0	1	1	0	1	0	1	0	2	1	1	1	1	1	2	0	1	1
512	1	0	1	1	0	1	0	1	1	0	1	0	1	0	1	1	1	1	2	1	1	0
513	1	1	2	1	0	1	1	0	1	0	1	0	1	1	1	2	2	1	2	0	1	1
514	1	0	2	1	0	1	1	0	1	0	1	0	0	1	1	1	0	1	2	1	1	0
515	1	1	2	1	0	0	1	0	0	1	1	0	0	1	1	1	0	1	1	0	1	4
516	1	0	0	1	1	1	0	1	1	1	1	0	2	1	0	0	0	1	1	0	1	3
517	1	1	1	2	0	1	1	0	1	0	1	0	0	0	1	1	0	1	2	1	1	0
518	1	1	1	1	0	1	1	1	1	0	1	0	1	1	1	1	0	1	1	0	1	2
519	1	1	2	1	0	1	1	0	1	0	1	0	2	1	0	2	0	0	0	1	1	0
520	1	0	2	1	0	1	1	0	1	0	1	0	1	1	1	2	2	1	2	0	1	1
521	0	1	2	1	1	0	1	0	1	0	1	0	1	1	1	1	0	1	1	0	1	2
522	1	1	2	2	0	1	1	0	1	0	1	0	1	0	1	1	1	0	0	0	1	2
523	1	0	2	2	0	1	1	0	1	0	1	1	0	1	1	1	0	0	2	0	1	1
524	1	1	1	2	0	0	1	1	1	2	1	0	1	1	0	1	0	1	0	0	1	2
525	1	1	2	2	0	1	1	0	1	0	1	0	1	0	0	1	0	1	2	1	1	0
526	0	1	2	1	0	1	1	0	1	0	1	1	0	0	1	1	2	1	1	0	1	4
527	0	1	2	1	0	0	1	0	1	0	1	0	1	0	1	1	1	1	2	0	1	1
528	1	1	1	1	0	0	1	0	1	0	1	0	1	1	2	1	0	0	0	0	1	2
529	1	0	1	2	0	1	0	1	1	0	1	0	1	1	0	1	0	1	1	0	1	4
530	1	1	2	1	0	0	1	0	0	1	1	0	1	1	0	1	2	1	1	0	1	1
531	1	0	1	1	0	0	1	1	1	1	1	0	1	1	0	1	0	1	1	1	1	0
532	1	1	1	1	0	0	1	1	1	1	1	0	1	1	0	1	0	1	1	0	1	4
533	1	0	2	1	1	1	1	0	1	0	1	0	1	1	0	1	0	1	2	1	1	0
534	1	0	2	2	0	1	1	0	1	0	1	0	1	1	0	0	0	1	1	1	1	0
535	1	0	0	2	1	1	1	0	0	1	1	0	2	0	1	1	0	0	0	0	1	1
536	1	1	2	2	0	0	0	0	0	0	1	0	1	0	1	1	1	0	0	0	1	2
537	1	1	2	1	0	1	1	1	1	0	1	0	1	0	1	1	1	1	0	1	1	0
538	1	0	2	2	0	0	1	0	0	1	1	0	1	0	1	1	1	0	0	0	0	1
539	1	1	2	2	0	1	1	0	1	0	1	0	1	1	0	2	0	1	1	0	1	4
540	1	0	2	1	0	1	1	0	1	0	1	0	1	0	2	2	1	0	1	0	1	2
541	1	0	1	1	0	0	1	0	1	0	1	0	0	0	0	0	0	0	2	0	1	1
542	1	0	1	1	0	1	0	1	1	0	1	0	2	0	0	1	0	0	1	0	1	1
543	1	0	0	2	0	1	0	1	1	0	1	1	0	1	1	1	1	0	2	0	1	1
544	1	0	0	1	1	1	0	1	1	0	1	0	2	1	1	1	0	0	0	1	1	0
545	0	0	2	1	0	1	1	0	1	0	1	0	1	0	1	1	0	0	2	1	1	0
546	1	1	2	2	1	0	1	0	1	0	1	0	1	1	1	2	1	0	2	1	1	0
547	1	0	1	1	0	0	0	1	1	0	1	0	1	1	1	1	0	1	1	1	1	0
548	1	0	1	1	0	0	0	1	1	1	0	0	1	1	0	2	0	0	1	1	1	0
549	0	0	1	1	0	1	0	0	1	0	1	0	0	0	1	1	0	1	1	0	1	4
550	1	0	1	1	0	1	0	1	1	0	1	0	1	0	1	1	0	1	2	0	1	4
551	1	0	0	2	0	1	0	1	1	0	1	0	1	0	1	1	1	0	1	1	1	0
552	1	1	0	1	0	0	0	1	1	2	1	0	2	1	1	1	0	1	1	0	1	4
553	1	1	2	1	0	0	1	0	0	1	1	0	2	1	0	1	1	0	0	0	1	2
554	1	1	2	2	0	1	1	0	1	0	1	0	1	1	1	1	0	0	2	1	1	0
555	1	1	2	2	0	0	1	0	1	0	1	0	1	0	1	1	0	0	1	0	0	1
556	1	1	2	2	0	1	1	0	1	0	1	0	1	1	1	1	0	1	1	0	1	2
557	1	0	1	2	0	1	0	0	1	0	1	0	2	1	1	0	0	1	1	0	1	4
558	0	0	2	2	0	1	1	0	1	0	1	0	1	1	1	2	1	1	1	1	0	0
559	0	0	2	1	0	0	1	1	1	0	1	0	1	1	1	2	2	0	2	0	1	2
560	0	1	2	2	0	0	1	0	0	1	1	0	1	0	0	1	0	1	1	0	1	2
561	1	0	1	2	0	1	0	1	1	0	1	0	1	1	0	1	0	1	2	1	1	0
562	1	1	2	1	1	0	1	0	1	0	1	0	1	0	0	0	0	0	1	0	1	3
563	0	1	2	1	0	0	1	0	1	0	1	0	1	1	1	2	1	1	1	0	1	2
564	1	0	2	1	0	0	1	0	1	0	1	0	1	1	1	2	0	0	2	0	1	2
565	1	0	2	1	0	1	1	0	1	0	1	0	1	0	1	1	0	1	2	0	1	2
566	1	1	1	2	1	1	0	0	1	0	1	0	1	0	0	1	0	1	2	0	1	1
567	1	0	1	2	0	1	0	1	1	0	1	0	1	0	0	2	0	0	2	0	1	1
568	1	1	1	1	0	1	1	0	1	0	1	0	1	1	0	1	1	0	1	0	0	1
569	1	1	1	2	0	1	0	0	1	0	1	0	1	0	1	2	0	0	1	1	1	0
570	0	1	0	1	0	1	1	1	1	1	1	0	1	1	0	0	0	1	1	0	1	4
571	1	0	2	2	0	1	1	0	1	0	1	0	1	1	1	2	1	1	2	0	1	1
572	1	1	1	1	0	0	1	0	0	1	0	0	1	1	1	2	0	1	1	0	1	4
573	1	1	2	2	0	0	1	1	1	1	1	0	2	1	1	1	2	0	1	1	1	0
574	1	1	2	2	0	1	1	1	1	0	1	0	1	0	1	2	2	0	2	0	1	2
575	1	0	0	0	0	1	0	1	1	1	1	0	1	1	1	0	0	1	1	0	1	4
576	1	0	1	1	0	0	1	1	1	1	1	0	2	1	1	1	0	0	2	1	1	0
577	1	0	2	1	0	0	1	1	1	1	1	0	1	1	0	1	0	1	2	1	1	0
578	1	1	2	2	0	0	1	0	0	1	1	0	1	1	1	1	2	1	2	0	1	2
579	1	0	1	1	0	1	1	0	1	0	1	0	1	0	1	2	2	1	2	0	1	1
580	1	0	1	1	0	1	0	1	1	0	1	0	1	0	1	2	0	1	2	0	1	1
581	1	0	2	2	0	0	1	1	0	1	1	0	2	0	1	2	1	0	0	0	1	1
582	1	0	1	1	0	0	1	0	0	1	1	0	2	1	0	1	0	2	2	1	1	0
583	0	1	2	1	0	0	1	0	1	0	1	0	1	1	1	1	0	1	1	0	1	2
584	1	0	2	1	1	0	0	1	1	0	1	0	1	0	0	1	0	0	2	0	1	2
585	0	1	2	2	0	0	1	0	1	0	1	0	2	0	1	1	0	0	2	1	1	0
586	1	1	2	2	0	1	1	0	1	0	1	0	1	0	0	1	0	0	2	0	1	1
587	0	0	1	1	0	1	0	0	1	1	1	1	0	1	1	1	1	1	1	0	1	4
588	1	0	0	2	0	0	0	0	1	1	1	0	0	1	1	1	0	0	0	1	1	0
589	1	1	1	1	0	1	0	0	1	0	1	0	1	0	0	2	0	1	1	0	1	4
590	1	1	2	1	0	1	1	1	1	0	1	0	1	0	1	1	1	1	1	0	1	4
591	1	0	2	2	0	1	1	0	1	0	1	0	1	0	1	1	0	1	1	1	1	0
592	1	1	2	2	0	1	1	0	1	0	1	0	0	1	1	0	1	0	1	1	1	0
593	1	1	1	2	0	1	1	0	1	0	1	0	2	1	1	1	1	1	1	1	1	0
594	1	0	2	1	0	0	0	0	1	0	1	0	2	0	1	0	0	0	2	1	1	0
595	1	0	1	2	1	1	0	0	1	0	1	0	2	1	1	1	2	0	2	0	1	1
596	1	0	0	1	0	1	0	0	1	1	1	1	0	1	1	0	1	1	1	0	0	1
597	1	0	2	2	0	1	1	0	1	0	1	0	1	1	0	1	0	0	1	0	1	1
598	1	1	2	1	0	1	1	0	1	0	1	0	2	0	1	1	0	0	0	0	1	1
599	1	1	1	1	0	1	0	1	1	0	1	0	2	1	1	2	0	1	1	0	0	1
600	0	0	1	1	0	1	1	0	1	0	1	0	2	0	1	2	0	1	0	1	1	0
601	1	0	2	2	0	1	1	0	1	0	1	0	1	1	0	0	0	1	1	1	1	0
602	1	0	1	1	0	1	0	1	1	0	1	0	1	0	0	1	0	0	2	1	0	0
603	1	0	2	1	0	1	1	0	1	0	1	0	1	1	0	1	0	1	1	0	1	4
604	1	0	1	2	0	1	0	1	1	0	1	0	0	0	1	1	0	0	0	1	1	0
605	1	1	2	1	1	1	1	0	1	0	1	0	1	1	1	2	0	1	1	0	1	2
606	1	1	2	2	0	0	1	0	0	1	1	0	1	1	0	1	0	1	1	0	1	1
607	1	1	2	1	0	1	1	0	1	0	1	0	1	0	0	1	0	1	1	0	1	4
608	1	0	2	2	0	1	1	0	1	0	1	0	1	1	1	2	0	1	1	0	1	4
609	1	1	1	1	0	1	1	0	1	0	1	0	2	1	0	1	0	0	2	0	1	1
610	1	0	2	2	0	1	1	0	1	0	1	0	1	1	0	1	0	0	0	1	1	0
611	1	1	2	2	0	1	1	0	1	0	1	0	1	0	1	2	1	1	1	0	1	2
612	1	0	0	1	0	2	0	1	1	0	1	0	1	0	1	1	1	0	1	0	1	4
613	1	0	1	1	0	0	1	1	1	1	0	0	1	1	0	2	0	1	1	0	1	1
614	1	0	1	1	0	1	0	1	1	0	1	0	1	1	0	1	0	1	1	0	1	4
615	0	0	1	1	0	1	0	1	1	0	1	0	2	1	1	1	1	1	2	1	0	0
616	1	1	2	1	0	1	0	1	1	1	1	1	1	0	1	1	0	1	1	0	1	2
617	0	0	1	1	0	1	0	0	1	0	1	0	0	0	1	0	1	0	2	1	1	0
618	1	1	2	1	0	0	1	0	1	0	1	0	1	1	1	2	2	0	2	0	1	2
619	1	1	1	1	0	0	1	0	1	0	1	0	1	0	2	2	1	1	2	0	0	1
620	0	1	2	2	0	0	1	0	0	1	1	0	2	1	1	0	0	1	0	0	1	2
621	1	0	2	1	0	1	1	1	2	0	1	0	1	0	2	0	2	1	1	0	1	1
622	1	0	2	1	0	1	1	0	1	0	1	0	1	0	2	1	1	1	1	0	1	1
623	1	0	2	1	0	1	1	1	1	0	1	1	2	1	1	0	0	0	1	1	1	0
624	1	0	0	1	0	0	0	1	1	1	1	0	0	0	0	0	0	1	1	0	1	1
625	1	1	2	2	0	0	1	0	0	1	1	0	2	1	1	1	0	1	0	1	1	0
626	1	1	0	1	0	0	1	1	1	1	1	1	0	1	0	1	0	0	2	0	1	4
627	1	1	1	2	0	0	1	0	1	0	1	0	1	1	0	1	0	1	1	0	0	1
628	1	0	2	2	0	1	1	0	1	0	1	0	1	1	1	1	1	0	1	0	1	2
629	1	1	2	1	0	1	1	0	1	0	0	0	1	1	2	2	1	1	1	0	1	4
630	1	1	1	1	0	0	1	0	0	1	0	0	1	0	1	1	1	1	2	0	1	1
631	1	1	2	1	0	0	1	0	0	1	1	0	2	1	0	1	1	1	1	1	1	0
632	1	0	1	2	1	1	1	0	1	0	1	0	1	1	1	2	1	0	2	0	1	4
633	0	1	2	1	0	0	1	0	1	0	1	0	1	0	1	1	0	1	1	0	1	3
634	1	1	2	1	0	1	1	0	1	0	1	0	1	1	1	1	1	1	1	0	1	1
635	1	0	2	1	0	1	1	0	1	0	1	0	1	1	0	1	0	0	2	1	1	0
636	1	1	2	1	0	1	1	0	1	0	1	0	2	0	1	2	1	0	1	1	1	0
637	1	1	2	2	0	1	1	0	1	0	1	0	2	1	1	1	1	1	2	1	1	0
638	1	0	1	1	0	0	1	0	1	2	1	0	2	1	0	2	0	1	1	0	1	3
639	0	1	2	1	0	1	1	0	1	0	1	0	1	1	1	2	1	1	2	0	1	1
640	1	0	1	1	0	1	0	1	1	0	1	0	1	1	1	2	0	1	1	0	1	1
641	1	0	2	2	0	1	1	0	1	0	1	0	1	1	1	1	1	0	1	1	1	0
642	1	1	2	2	0	0	1	0	0	1	1	0	1	1	1	2	1	1	2	0	1	4
643	1	0	1	2	0	1	0	1	1	0	1	0	2	0	1	1	1	1	1	1	1	0
644	1	0	2	2	0	0	1	1	1	0	1	0	1	0	1	1	1	0	2	0	1	4
645	1	1	1	1	0	1	1	0	1	0	1	1	0	1	1	1	1	0	2	0	1	4
646	0	0	0	2	0	1	0	1	1	0	1	0	2	0	2	2	1	1	2	0	1	1
647	1	1	2	2	0	1	1	0	1	0	1	0	1	1	1	1	1	1	2	0	1	1
648	1	0	1	2	0	1	0	1	1	0	1	0	2	1	1	1	1	1	2	1	1	0
649	1	1	2	1	0	1	1	0	1	0	1	0	1	0	1	1	1	2	2	0	1	1
650	1	0	1	2	0	1	0	1	1	0	1	0	2	1	1	1	1	2	2	1	1	0
651	1	0	2	2	0	0	1	0	1	0	1	0	2	0	1	1	1	1	1	0	1	4
652	1	1	1	1	0	0	1	1	1	1	1	0	0	1	0	0	0	1	1	1	1	0
653	1	0	2	1	0	0	1	1	1	1	1	0	1	1	1	1	0	1	1	0	1	4
654	1	0	2	2	0	1	1	0	0	1	1	0	1	0	1	0	0	0	2	0	1	4
655	1	0	0	1	1	1	0	1	1	1	1	0	1	0	1	2	0	1	1	0	1	2
656	1	0	1	1	0	1	0	0	1	0	1	0	1	1	0	1	0	0	2	0	1	1
657	1	0	1	2	0	1	0	0	1	0	1	0	1	1	1	1	1	2	2	1	1	0
658	1	0	1	2	0	1	0	1	1	0	1	0	0	0	1	0	0	0	2	0	1	1
659	0	1	2	1	0	0	1	0	1	0	1	0	1	1	1	1	0	1	1	0	1	4
660	1	0	2	1	0	0	1	0	1	0	1	0	2	1	0	2	0	0	2	0	1	1
661	1	1	1	2	0	0	1	1	1	1	1	0	1	1	0	0	0	1	2	1	1	0
662	1	1	2	2	1	1	1	0	1	0	1	0	0	0	1	1	0	0	2	1	1	0
663	1	0	1	1	0	1	0	1	1	0	1	0	1	1	1	2	0	0	2	1	1	0
664	0	1	1	2	0	0	1	1	1	1	1	0	2	1	1	1	0	1	2	0	1	2
665	1	0	1	2	0	1	0	1	1	0	1	0	1	1	1	2	1	2	2	1	1	0
666	1	1	2	2	0	1	1	0	1	0	1	0	0	1	2	1	2	0	1	1	1	0
667	1	1	1	1	1	0	1	0	0	1	1	0	0	1	1	1	0	0	1	1	1	0
668	1	1	1	2	0	1	1	0	1	0	1	0	1	1	0	1	0	0	2	1	1	0
669	1	0	1	1	0	1	0	0	1	0	1	0	1	0	1	1	1	1	0	0	1	2
670	1	0	2	1	0	1	1	0	1	0	1	0	1	1	1	2	1	2	1	1	0	0
671	0	1	2	2	0	0	1	0	1	1	1	0	1	0	1	1	1	1	1	1	1	0
672	1	0	1	2	0	1	0	1	1	0	1	0	2	1	1	1	0	0	0	0	1	2
673	1	0	1	1	0	1	0	0	1	0	1	0	1	0	1	1	0	1	2	1	1	0
674	1	0	2	2	0	1	1	0	1	0	1	0	1	1	1	1	1	1	1	0	1	4
675	1	1	2	2	0	1	1	0	1	0	1	0	2	1	1	1	1	2	0	1	1	0
676	1	0	2	2	1	1	1	0	1	0	1	0	1	0	2	1	0	1	1	0	1	4
677	1	0	1	1	0	1	0	0	1	0	1	0	1	1	1	2	0	1	1	1	1	0
678	1	0	0	1	0	0	1	0	1	0	1	0	1	1	0	0	0	0	2	0	1	2
679	1	1	2	2	0	1	1	0	1	0	1	0	2	1	1	1	1	0	2	1	1	0
680	0	1	1	2	0	1	1	0	1	0	1	0	2	1	2	1	0	1	1	0	0	1
681	1	0	0	1	0	1	0	1	1	1	1	0	2	1	0	0	0	1	1	0	1	4
682	0	1	2	1	0	0	0	0	1	0	1	0	1	0	1	1	0	0	2	1	1	0
683	1	0	1	2	0	1	0	1	1	0	1	0	1	1	1	1	2	1	1	0	1	1
684	1	1	2	1	0	1	1	0	1	0	1	0	1	0	1	2	0	1	2	1	1	0
685	1	0	1	2	0	2	0	0	2	0	1	0	1	1	2	2	1	1	2	0	1	2
686	1	0	2	1	0	0	1	0	1	0	1	0	1	1	1	1	0	0	1	0	1	2
687	1	0	0	1	0	1	0	1	1	0	1	0	1	1	0	0	0	1	1	0	1	1
688	1	1	2	1	0	0	1	0	0	1	1	0	1	1	1	1	1	1	1	0	1	1
689	1	1	0	0	0	1	0	1	1	0	1	0	1	1	1	1	0	1	1	0	1	4
690	1	0	1	2	0	0	0	0	1	0	1	0	2	0	2	1	0	0	2	1	1	0
691	0	1	1	1	0	1	1	0	1	0	1	0	1	0	1	1	1	0	2	1	1	0
692	0	1	1	1	0	1	1	0	1	0	1	0	2	1	0	0	0	1	2	1	1	0
693	1	1	1	2	0	0	1	0	0	2	1	0	2	1	1	1	2	1	1	1	1	0
694	1	1	2	2	0	0	1	0	1	0	1	0	1	0	1	1	1	0	1	0	1	2
695	0	1	1	1	0	0	0	0	1	0	1	0	2	1	0	0	0	0	2	1	1	0
696	1	0	0	2	0	1	1	1	1	1	1	0	1	0	0	0	0	1	2	1	1	0
697	1	1	2	2	0	0	1	0	1	1	1	0	1	0	0	1	0	1	1	1	1	0
698	1	0	0	2	0	1	0	1	1	0	1	0	2	0	1	1	0	1	2	0	1	1
699	0	1	1	1	0	1	0	0	0	1	1	0	1	0	0	1	0	1	1	0	1	4
700	0	1	2	2	0	0	1	2	1	2	1	0	1	1	1	2	0	1	1	0	1	2
701	1	1	2	1	0	0	1	0	0	1	1	0	1	1	1	1	0	1	1	0	1	2
702	1	0	1	1	0	1	0	1	1	0	1	0	2	1	1	2	1	0	2	1	1	0
703	1	1	2	1	0	0	1	0	0	1	1	0	1	1	1	1	1	1	0	0	1	2
704	1	0	1	2	0	0	1	0	1	0	1	0	1	0	0	1	0	1	0	1	1	0
705	1	1	1	1	0	1	1	1	1	0	1	0	1	1	1	1	0	0	2	0	1	3
706	1	0	2	1	0	1	1	1	1	0	1	0	1	1	1	2	0	0	1	0	1	1
707	0	1	1	1	0	1	1	0	1	0	1	0	2	0	2	0	0	0	1	1	1	0
708	1	1	2	1	1	0	1	0	0	0	1	0	1	1	1	1	1	1	0	0	1	2
709	1	0	2	1	0	0	1	0	1	0	1	0	1	1	0	2	0	1	1	0	1	2
710	1	0	2	2	0	1	1	0	1	0	1	0	1	0	0	1	0	0	1	0	1	1
711	1	1	2	1	0	0	1	0	1	0	1	0	1	0	1	0	0	0	0	1	1	0
712	1	0	1	1	0	1	0	1	1	0	1	0	2	0	1	2	0	0	2	0	1	1
713	0	0	1	1	0	1	1	0	1	0	1	0	2	0	1	2	0	0	2	1	1	0
714	0	0	1	2	0	1	0	1	1	0	1	0	2	1	1	1	0	1	1	1	1	0
715	1	0	2	2	0	1	1	0	0	1	1	0	1	1	1	1	0	0	0	0	1	2
716	1	1	1	2	0	1	0	0	1	0	1	0	1	0	0	2	0	1	1	0	1	1
717	1	1	1	2	0	1	1	0	1	0	1	0	2	0	1	1	0	1	2	1	1	0
718	0	1	2	1	0	1	1	0	1	0	1	0	2	1	0	1	0	0	1	1	1	0
719	0	0	0	1	0	1	0	1	1	1	1	0	0	1	0	0	0	1	1	0	1	4
720	1	1	2	1	0	1	1	0	1	0	1	0	1	0	1	1	2	0	2	0	1	4
721	1	1	2	1	1	1	1	0	1	0	1	0	2	1	2	2	1	1	2	1	1	0
722	1	0	1	1	0	1	0	0	1	0	1	0	1	1	1	2	0	0	0	0	1	2
723	0	1	2	1	0	0	1	0	1	0	1	0	1	1	1	1	2	0	2	0	1	2
724	1	1	2	2	0	0	1	0	1	0	1	0	2	0	1	2	2	1	2	0	1	1
725	1	1	1	2	0	1	1	0	1	0	1	1	0	1	0	0	0	0	2	0	1	1
726	1	1	1	1	0	1	0	0	1	0	1	0	1	0	0	1	0	0	2	1	1	0
727	1	0	1	1	0	1	0	0	1	0	1	0	1	1	1	1	1	0	2	1	1	0
728	1	0	1	1	0	1	0	0	1	0	1	0	2	1	0	1	0	0	1	1	1	0
729	1	0	0	2	0	1	0	0	1	0	1	0	1	0	0	1	0	1	1	0	0	1
730	1	0	2	1	0	0	0	0	0	1	1	0	1	0	1	1	0	0	2	1	1	0
731	1	1	2	1	0	0	1	0	0	1	1	0	1	1	1	1	2	2	1	1	1	0
732	1	1	2	1	0	1	1	0	1	0	1	0	1	1	1	1	1	0	2	1	1	0
733	1	1	2	2	0	1	1	0	1	0	1	0	1	1	1	1	1	0	2	0	1	4
734	1	1	1	1	1	1	1	0	1	0	1	0	1	1	2	2	1	0	2	0	1	1
735	1	1	2	0	0	0	1	0	0	1	1	0	1	1	1	1	0	1	1	0	1	2
736	0	0	1	1	0	0	1	1	1	1	1	0	1	1	1	1	0	1	1	0	1	4
737	1	0	1	1	0	1	1	0	1	0	1	0	1	1	0	1	0	1	2	0	1	4
738	1	1	2	2	0	1	1	0	1	0	1	0	1	0	2	2	1	1	2	0	1	3
739	1	0	2	1	1	1	1	0	1	0	1	0	2	1	0	2	0	0	2	0	1	1
740	0	0	1	2	0	1	0	0	1	0	1	0	1	0	2	2	1	0	2	0	1	2
741	1	0	1	1	0	0	1	1	0	1	0	0	2	1	1	2	2	0	2	0	1	2
742	0	1	2	1	0	1	1	0	1	0	1	0	1	0	0	2	0	1	2	0	1	2
743	1	0	1	1	0	0	0	0	1	0	1	0	1	0	0	1	0	1	2	1	1	0
744	0	1	1	1	0	1	1	0	1	0	1	0	1	1	1	2	0	1	2	0	1	4
745	1	0	1	1	0	1	0	0	1	0	1	0	1	1	1	2	1	0	2	1	0	0
746	0	0	2	1	0	1	1	0	1	0	1	0	2	1	0	0	0	0	2	1	1	0
747	1	1	1	2	0	0	1	0	0	1	1	0	1	1	1	1	1	0	2	0	1	2
748	1	0	2	2	0	1	1	0	1	0	1	0	1	1	1	1	1	2	2	1	1	0
749	1	0	1	2	0	1	0	0	1	0	1	0	2	0	0	1	1	2	2	1	1	0
750	1	0	1	2	0	1	0	0	1	0	1	0	1	1	1	2	0	0	1	1	1	0
751	1	1	2	1	0	1	1	0	1	0	1	0	1	0	0	1	1	1	1	0	1	2
752	1	0	1	1	0	1	0	1	1	0	1	0	1	1	1	1	0	0	1	1	1	0
753	0	0	1	1	0	1	1	1	1	0	1	0	1	0	1	1	0	0	2	1	1	0
